# Supplementary material
Source: publisher figshare collection journal article supplement (https://tandf.figshare.com/articles/dataset/_/5387743)
Supplement: Supplementary file 1 [file 1]

## Sheet: Sheet1
SUPPLEMENTARY TABLE 2 - Compilation of antibiotic-resistance genes from CARD database
ARO accession	ARO name	Protein accession	UniProt entry	Primary gene name	Protein names	Organism
ARO:3003952	YojI	NP_416715.1	P33941	yojI	ABC transporter ATP-binding/permease protein YojI	Escherichia coli (strain K12)
ARO:3003064	ykkD	CAB13167.1	P49857	ykkD	Multidrug resistance protein YkkD	Bacillus subtilis (strain 168)
ARO:3003063	ykkC	CAB13166.1	P49856	ykkC	Multidrug resistance protein YkkC	Bacillus subtilis (strain 168)
ARO:3001351	SHV-183	CDN33427.1	X5JZE0	blaSHV-183	Beta-lactamase (EC 3.5.2.6)	Enterobacter cloacae
ARO:3001394	TEM-217	CDN33426.1	X5JYP1	blaTEM-217	Beta-lactamase (EC 3.5.2.6)	Enterobacter cloacae
ARO:3002858	dfrA12	AHW42429.1	X5CWF8	dfrA12	Dihydrofolate reductase (EC 1.5.1.3)	Klebsiella pneumoniae subsp. pneumoniae
ARO:3002122	CMY-111	AHW47897.1	X5CK85	blaCMY-111	Beta-lactamase (EC 3.5.2.6)	Serratia marcescens
ARO:3002383	SME-5	AHV85514.1	X4Z2B6	blaSME-5	Beta-lactamase (EC 3.5.2.6)	Serratia marcescens
ARO:3002863	dfrA8	AHV80711.1	X4YBR0	dfrA8	Dihydrofolate reductase DfrA8	Salmonella typhimurium
ARO:3001577	OXA-391	AHN53381.1	X2J431	blaOXA-391	Beta-lactamase OXA-391	Acinetobacter baumannii
ARO:3001839	ACT-18	AHM76777.1	X2EXI6	blaACT-18	Beta-lactamase (EC 3.5.2.6)	Enterobacter cloacae
ARO:3001840	ACT-19	AHM76779.1	X2EXI1	blaACT-19	Beta-lactamase (EC 3.5.2.6)	Enterobacter cloacae
ARO:3001843	ACT-22	AHM76774.1	X2EXI0	blaACT-22	Beta-lactamase (EC 3.5.2.6)	Enterobacter cloacae
ARO:3002106	CMY-93	AHM76768.1	X2EXH4	blaCMY-93	Beta-lactamase (EC 3.5.2.6)	Citrobacter freundii
ARO:3002190	MOX-8	AGH56079.1	X2C6D0	blaMOX-8	Beta-lactamase (EC 3.5.2.6)	Aeromonas caviae (Aeromonas punctata)
ARO:3003794	Staphylococcus aureus walK with mutation conferring daptomycin resistance	CAG39047	Q6GKS6	walK	Sensor protein kinase WalK (EC 2.7.13.3)	Staphylococcus aureus (strain MRSA252)
ARO:3002099	CMY-86	AHL39327.1	W8QQ99	blaCMY-86	Beta-lactamase (EC 3.5.2.6)	Citrobacter freundii
ARO:3002098	CMY-85	AHL39322.1	W8QQ94	blaCMY-85	Beta-lactamase (EC 3.5.2.6)	Citrobacter freundii
ARO:3001845	ACT-25	AHL39338.1	W8Q8D7	blaACT-25	Beta-lactamase (EC 3.5.2.6)	Enterobacter cloacae
ARO:3001848	ACT-28	AHL39333.1	W8Q8D1	blaACT-28	Beta-lactamase (EC 3.5.2.6)	Enterobacter cloacae
ARO:3002095	CMY-82	AHL39324.1	W8Q4Q2	blaCMY-82	Beta-lactamase (EC 3.5.2.6)	Citrobacter freundii
ARO:3001568	OXA-382	AHL30286.1	W8Q2E0	oxa-382	Beta-lactamase OXA-382	Acinetobacter baumannii
ARO:3001569	OXA-383	AHL30281.1	W8Q2D3	oxa-383	Beta-lactamase OXA-383	Acinetobacter baumannii
ARO:3001562	OXA-376	AHL30276.1	W8Q2C8	oxa-376	Beta-lactamase OXA-376	Acinetobacter baumannii
ARO:3001847	ACT-27	AHL39340.1	W8PX01	blaACT-27	Beta-lactamase (EC 3.5.2.6)	Enterobacter cloacae
ARO:3002117	CMY-105	AHL39330.1	W8PWY8	blaCMY-105	Beta-lactamase (EC 3.5.2.6)	Citrobacter freundii
ARO:3001844	ACT-24	AHL39336.1	W8PWC8	blaACT-24	Beta-lactamase (EC 3.5.2.6)	Enterobacter cloacae
ARO:3001575	OXA-389	AHL30287.1	W8PKX2	oxa-389	Beta-lactamase OXA-389	Acinetobacter baumannii
ARO:3001570	OXA-384	AHL30282.1	W8PKW8	oxa-384	Beta-lactamase OXA-384	Acinetobacter baumannii
ARO:3001563	OXA-377	AHL30277.1	W8PKW1	oxa-377	Beta-lactamase OXA-377	Acinetobacter baumannii
ARO:3001571	OXA-385	AHL30272.1	W8PKV7	oxa-385	Beta-lactamase OXA-385	Acinetobacter baumannii
ARO:3001576	OXA-390	AHL30283.1	W8PH72	oxa-390	Beta-lactamase OXA-390	Acinetobacter baumannii
ARO:3001564	OXA-378	AHL30278.1	W8PH67	oxa-378	Beta-lactamase OXA-378	Acinetobacter baumannii
ARO:3001572	OXA-386	AHL30273.1	W8PH59	oxa-386	Beta-lactamase OXA-386	Acinetobacter baumannii
ARO:3001574	OXA-388	AHL30284.1	W8P9P1	oxa-388	Beta-lactamase OXA-388	Acinetobacter baumannii
ARO:3001565	OXA-379	AHL30279.1	W8P9N7	oxa-379	Beta-lactamase OXA-379	Acinetobacter baumannii
ARO:3001560	OXA-374	AHL30274.1	W8P9N2	oxa-374	Beta-lactamase OXA-374	Acinetobacter baumannii
ARO:3001567	OXA-381	AHL30285.1	W8P9G9	oxa-381	Beta-lactamase OXA-381	Acinetobacter baumannii
ARO:3001566	OXA-380	AHL30280.1	W8P9G3	oxa-380	Beta-lactamase OXA-380	Acinetobacter baumannii
ARO:3001561	OXA-375	AHL30275.1	W8P9F9	oxa-375	Beta-lactamase OXA-375	Acinetobacter baumannii
ARO:3001573	OXA-387	AHK51384.1	W8IL95	blaOXA-387	Beta-lactamase OXA-387	Acinetobacter baumannii
ARO:3001393	TEM-216	AHJ78622.1	W8E5Z0	blaTEM-216	Beta-lactamase (EC 3.5.2.6)	Escherichia coli
ARO:3001552	OXA-365	AHI63011.1	W6AX94	bla-oxa-51	Beta-lactamase	Acinetobacter baumannii
ARO:3004063	EdeQ	AHH86051.1	W5VTK4	edeQ	Edeine acetyltransferase	Brevibacillus brevis (Bacillus brevis)
ARO:3003733	fusC	WP_001033157	W5VSE4	fusC	Fusidic acid resistance protein	Staphylococcus aureus
ARO:3002631	spd	AGW81558.1	W1JB67	spd	Spectinomycin adenyltransferase (Spectinomycin resistance protein)	Staphylococcus aureus
ARO:3002143	DHA-12	CDL68900.1	W1I7B7	blaDHA-12	Beta-lactamase (EC 3.5.2.6)	Proteus mirabilis
ARO:3001994	CTX-M-137	BAO37256.1	W0T351	blaCTX-M-137	Beta-lactamase (EC 3.5.2.6)	Escherichia coli
ARO:3001774	OXA-370	AHF71363.1	W0HE56	blaOXA-370	Beta-lactamase (EC 3.5.2.6)	Enterobacter sp. 87F-2
ARO:3002798	QnrS9	AHF20043.1	W0FF57	qnrS	QnrS-9 (Fragment)	Klebsiella pneumoniae
ARO:3001861	IMI-4	AHE78014.1	W0C0S5	imi-4	Beta-lactamase (EC 3.5.2.6)	Enterobacter cloacae
ARO:3003061	viomycin phosphotransferase	CAA26235.1	P18623	vph	Viomycin phosphotransferase (EC 2.7.1.103) (Viomycin kinase)	Streptomyces vinaceus
ARO:3001307	VgbA	AAA98349.1	P17978	vgb	Virginiamycin B lyase (EC 4.2.99.-) (Streptogramin B lyase)	Staphylococcus aureus
ARO:3002840	vatA	AAA26683.1	P26839	vat	Virginiamycin A acetyltransferase (EC 2.3.1.-)	Staphylococcus aureus
ARO:3002962	vanZA	AAA65959.1	Q06242	vanZ	Protein VanZ	Enterococcus faecium (Streptococcus faecium)
ARO:3002955	vanYA	AAA65958.1	P37711	vanY	D-alanyl-D-alanine carboxypeptidase (DD-carboxypeptidase) (DD-peptidase) (EC 3.4.16.4)	Enterococcus faecium (Streptococcus faecium)
ARO:3002956	vanYB	AAB05624.1	Q47746	vanYB	D-alanyl-D-alanine carboxypeptidase (DD-carboxypeptidase) (DD-peptidase) (EC 3.4.16.4)	Enterococcus faecalis (strain ATCC 700802 / V583)
ARO:3002949	vanXA	AAA65957.1	Q06241	vanX	D-alanyl-D-alanine dipeptidase (D-Ala-D-Ala dipeptidase) (EC 3.4.13.22) (Vancomycin B-type resistance protein VanX)	Enterococcus faecium (Streptococcus faecium)
ARO:3002950	vanXB	AAB05628.1	Q47749	vanXB	D-alanyl-D-alanine dipeptidase (D-Ala-D-Ala dipeptidase) (EC 3.4.13.22) (Vancomycin B-type resistance protein VanXB)	Enterococcus faecalis (strain ATCC 700802 / V583)
ARO:3002964	vanWB	AAB05625.1	Q47747	vanW	Vancomycin B-type resistance protein VanW	Enterococcus faecalis (strain ATCC 700802 / V583)
ARO:3002971	vanTE	AAL27444.1	Q93A44	vanTE	Amino-acid racemase (EC 5.1.1.-) (Vancomycin E-type resistance protein VanT)	Enterococcus faecalis (Streptococcus faecalis)
ARO:3002970	vanTC	AAD22403.1	Q9X3P3	vanT	Serine/alanine racemase (EC 5.1.1.-) (EC 5.1.1.1) (Vancomycin C-type resistance protein VanT)	Enterococcus gallinarum
ARO:3002931	vanSA	AAA65954.1	Q06240	vanS	Sensor protein VanS (EC 2.7.13.3) (Vancomycin histidine protein kinase) (Vancomycin resistance protein VanS)	Enterococcus faecium (Streptococcus faecium)
ARO:3002932	vanSB	AAB05623.1	Q47745	vanSB	Sensor protein VanSB (EC 2.7.13.3) (Vancomycin B-type resistance protein VanSB) (Vancomycin histidine protein kinase)	Enterococcus faecalis (strain ATCC 700802 / V583)
ARO:3002919	vanRA	AAA65953.1	Q06239	vanR	Regulatory protein VanR	Enterococcus faecium (Streptococcus faecium)
ARO:3002921	vanRB	AAB05622.1	Q47744	vanRB	Regulatory protein VanRB	Enterococcus faecalis (strain ATCC 700802 / V583)
ARO:3002942	vanHA	AAA65955.1	Q05709	vanH	D-specific alpha-keto acid dehydrogenase (EC 1.1.1.-) (Vancomycin resistance protein VanH)	Enterococcus faecium (Streptococcus faecium)
ARO:3002943	vanHB	AAB05626.1	Q47748	vanHB	D-specific alpha-keto acid dehydrogenase (EC 1.1.1.-) (Vancomycin B-type resistance protein VanHB)	Enterococcus faecalis (strain ATCC 700802 / V583)
ARO:3000368	vanC	AAA24786.1	P29753	vanC	Vancomycin C-type resistance protein VanC (EC 6.3.2.-) (VanC ligase)	Enterococcus gallinarum
ARO:3000010	vanA	AAA65956.1	P25051	vanA	Vancomycin/teicoplanin A-type resistance protein VanA (EC 6.1.2.1) (D-alanine--D-lactate ligase) (VanA ligase)	Enterococcus faecium (Streptococcus faecium)
ARO:3002797	QnrS8	AHE41345.1	V9ZCP8	qnrS8	Plasmid-mediated quinolone resistance protein S8	Klebsiella pneumoniae
ARO:3002768	QnrB55	AHE41343.1	V9ZB17	qnrB55	Plasmid-mediated quinolone resistance protein B55	Raoultella terrigena (Klebsiella terrigena)
ARO:3000615	mefA	YP_008997285.1	V9ZAU6	mefA	Macrolide-efflux protein	Exiguobacterium sp. S3-2
ARO:3002626	ANT(6)-Ia	YP_008997281.1	V9Z7M4	aadE	Putative aminoglycoside 6-adenylyltansferase	Exiguobacterium sp. S3-2
ARO:3002796	QnrS7	AHE41344.1	V9Z6W5	qnrS7	Plasmid-mediated quinolone resistance protein S7	Escherichia coli
ARO:3001557	OXA-371	BAO09635.1	V5XVS3	OXA-371	Class D beta-lactamase	Acinetobacter baumannii
ARO:3003199	AAC(6')-Iak	BAO21229.1	V5XKM9	aac(6')-Iak	Aminoglycoside N(6')-acetyltransferase type 1 (EC 2.3.1.82) (Aminoglycoside resistance protein)	Stenotrophomonas maltophilia (Pseudomonas maltophilia) (Xanthomonas maltophilia)
ARO:3002071	CMY-110	BAO05497.1	V5XKK3	blaCMY-110	Beta-lactamase (EC 3.5.2.6)	Escherichia coli
ARO:3003013	dfrA15	AHB39758.1	V5RSE8	dfrA15	Dihydrofolate reductase	Escherichia coli
ARO:3001357	SHV-173	AHA80959.1	V5N2H6	---	Beta-lactamase (EC 3.5.2.6)	Klebsiella pneumoniae
ARO:3002114	CMY-102	AHA80103.1	V5N0W0	blaCMY-102	Beta-lactamase (EC 3.5.2.6)	Escherichia coli
ARO:3001388	TEM-211	AHA80960.1	V5N0U5	---	Beta-lactamase (EC 3.5.2.6)	Proteus mirabilis
ARO:3001361	SHV-178	AHA80963.1	V5N0A9	---	Beta-lactamase (EC 3.5.2.6)	Klebsiella pneumoniae
ARO:3001356	SHV-172	AHA80958.1	V5N0A6	---	Beta-lactamase (EC 3.5.2.6)	Klebsiella pneumoniae
ARO:3002005	CTX-M-147	AHA80961.1	V5N077	---	Beta-lactamase (EC 3.5.2.6)	Klebsiella pneumoniae
ARO:3001362	SHV-179	AHA80962.1	V5N016	---	Beta-lactamase (EC 3.5.2.6)	Klebsiella pneumoniae
ARO:3002115	CMY-103	AHA80104.1	V5MZ38	blaCMY-103	Beta-lactamase (EC 3.5.2.6)	Citrobacter freundii
ARO:3002113	CMY-101	AHA80102.1	V5MYL9	blaCMY-101	Beta-lactamase (EC 3.5.2.6)	Escherichia coli
ARO:3001841	ACT-20	AHA80105.1	V5MYE0	blaACT-20	Beta-lactamase (EC 3.5.2.6)	Enterobacter hormaechei
ARO:3001842	ACT-21	AHA80106.1	V5MYB0	blaACT-21	Beta-lactamase (EC 3.5.2.6)	Enterobacter hormaechei
ARO:3002112	CMY-100	AHA80101.1	V5MYA6	blaCMY-100	Beta-lactamase (EC 3.5.2.6)	Citrobacter freundii
ARO:3001390	TEM-213	AHA58207.1	V5LVW5	---	Beta-lactamase (EC 3.5.2.6) (Fragment)	Pseudomonas aeruginosa
ARO:3002930	vanRO	AHA41505.1	V5KW95	---	VanR	Rhodococcus hoagii (Corynebacterium equii)
ARO:3002913	vanO	AHA41500.1	V5KW92	ddl	D-alanine--D-alanine ligase (EC 6.3.2.4) (D-Ala-D-Ala ligase) (D-alanylalanine synthetase)	Rhodococcus hoagii (Corynebacterium equii)
ARO:3002954	vanXO	AHA41501.1	V5KVC0	---	D-alanyl-D-alanine dipeptidase (D-Ala-D-Ala dipeptidase) (EC 3.4.13.22)	Rhodococcus hoagii (Corynebacterium equii)
ARO:3002941	vanSO	AHA41504.1	V5KVA5	---	VanS	Rhodococcus hoagii (Corynebacterium equii)
ARO:3002948	vanHO	AHA41499.1	V5KVA1	---	VanH	Rhodococcus hoagii (Corynebacterium equii)
ARO:3002986	bacA	AAC76093.1	P60932	uppP	Undecaprenyl-diphosphatase (EC 3.6.1.27) (Bacitracin resistance protein) (Undecaprenyl pyrophosphate phosphatase)	Escherichia coli (strain K12)
ARO:3003577	PmrE	AAC75089.1	P76373	ugd	UDP-glucose 6-dehydrogenase (UDP-Glc dehydrogenase) (UDP-GlcDH) (UDPGDH) (EC 1.1.1.22)	Escherichia coli (strain K12)
ARO:3003893	Escherichia coli UhpA with mutation conferring resistance to fosfomycin	CDJ73205.1	U6NEU8	uhpA	DNA-binding transcriptional activator UhpA	Escherichia coli str. K-12 substr. MC4100
ARO:3003893	Escherichia coli UhpA with mutation conferring resistance to fosfomycin	CDJ73205.1	U6NEU8	uhpA	DNA-binding transcriptional activator UhpA	Escherichia coli str. K-12 substr. MC4100
ARO:3003899	Escherichia coli PtsI with mutation conferring resistance to fosfomycin	CDJ72759.1	U6NBN3	ptsI	phosphoenolpyruvate-protein phosphotransferase	Escherichia coli str. K-12 substr. MC4100
ARO:3003900	Escherichia coli CyaA with mutation conferring resistance to fosfomycin	CDJ73082.1	U6NA03	cyaA	adenylate cyclase	Escherichia coli str. K-12 substr. MC4100
ARO:3003900	Escherichia coli CyaA with mutation conferring resistance to fosfomycin	CDJ73082.1	U6NA03	cyaA	adenylate cyclase	Escherichia coli str. K-12 substr. MC4100
ARO:3003890	Escherichia coli UhpT with mutation conferring resistance to fosfomycin	CDJ73208.1	U6N9K0	uhpT	sugar phosphate antiporter	Escherichia coli str. K-12 substr. MC4100
ARO:3003889	Escherichia coli GlpT with mutation conferring resistance to fosfomycin	CDJ72593.1	U6N7X1	glpT	sn-glycerol-3-phosphate transporter	Escherichia coli str. K-12 substr. MC4100
ARO:3001550	OXA-363	AHA11126.1	U6A1P5	blaOXA-363	Beta-lactamase OXA-363	Acinetobacter lwoffii
ARO:3001549	OXA-362	AHA11125.1	U5ZZL4	blaOXA-362	Beta-lactamase OXA-362	Acinetobacter lwoffii
ARO:3001548	OXA-361	AHA11124.1	U5ZZ65	blaOXA-361	Beta-lactamase OXA-361	Acinetobacter lwoffii
ARO:3001544	OXA-357	AGZ83153.1	U5Y3Y7	blaOXA-357	Beta-lactamase	Acinetobacter calcoaceticus
ARO:3001545	OXA-358	AGZ83154.1	U5Y1P1	blaOXA-358	Beta-lactamase	Acinetobacter calcoaceticus
ARO:3001546	OXA-359	AGZ83155.1	U5Y0Z5	blaOXA-359	Beta-lactamase	Acinetobacter calcoaceticus
ARO:3001547	OXA-360	AGZ83156.1	U5Y0R2	blaOXA-360	Beta-lactamase	Acinetobacter schindleri
ARO:3001382	TEM-205	AGZ20205.1	U5U781	---	Beta-lactamase (EC 3.5.2.6) (Fragment)	Pseudomonas aeruginosa
ARO:3002070	CMY-99	AGU59995.1	U5KSH4	blaCMY-99	Beta-lactamase (EC 3.5.2.6)	Proteus mirabilis
ARO:3001541	OXA-354	AGW83452.1	U3Q607	blaOXA-354	Beta-lactamase	Acinetobacter calcoaceticus
ARO:3001536	OXA-349	AGW83447.1	U3Q601	blaOXA-349	Beta-lactamase	Acinetobacter calcoaceticus
ARO:3001540	OXA-353	AGW83451.1	U3Q2J0	blaOXA-353	Beta-lactamase	Acinetobacter calcoaceticus
ARO:3001535	OXA-348	AGW83446.1	U3Q2I7	blaOXA-348	Beta-lactamase	Acinetobacter calcoaceticus
ARO:3001542	OXA-355	AGW83453.1	U3Q0P4	blaOXA-355	Beta-lactamase	Acinetobacter bereziniae (Acinetobacter genomosp. 10)
ARO:3001537	OXA-350	AGW83448.1	U3Q0P0	blaOXA-350	Beta-lactamase	Acinetobacter calcoaceticus
ARO:3001539	OXA-352	AGW83450.1	U3PZ18	blaOXA-352	Beta-lactamase	Acinetobacter calcoaceticus
ARO:3001543	OXA-356	AGW83454.1	U3PYD3	blaOXA-356	Beta-lactamase	Acinetobacter bereziniae (Acinetobacter genomosp. 10)
ARO:3001538	OXA-351	AGW83449.1	U3PYC8	blaOXA-351	Beta-lactamase	Acinetobacter calcoaceticus
ARO:3001386	TEM-209	AGW25367.1	U3N8Z2	blaTEM-209	Beta-lactamase (EC 3.5.2.6)	Klebsiella pneumoniae
ARO:3002000	CTX-M-142	AGW25368.1	U3N3M8	blaCTX-M-142	Beta-lactamase (EC 3.5.2.6)	Escherichia coli
ARO:3001523	OXA-335	AGW16417.1	U3MPT9	blaOXA-335	Beta-lactamase OXA-335	Acinetobacter lwoffii
ARO:3001518	OXA-330	AGW16412.1	U3MPT5	blaOXA-330	Beta-lactamase OXA-330	Acinetobacter calcoaceticus
ARO:3001513	OXA-325	AGW16407.1	U3MPT2	blaOXA-325	Beta-lactamase OXA-325	Acinetobacter calcoaceticus
ARO:3001519	OXA-331	AGW16413.1	U3MKH7	blaOXA-331	Beta-lactamase OXA-331	Acinetobacter calcoaceticus
ARO:3001514	OXA-326	AGW16408.1	U3MKH2	blaOXA-326	Beta-lactamase OXA-326	Acinetobacter calcoaceticus
ARO:3001522	OXA-334	AGW16416.1	U3MJU0	blaOXA-334	Beta-lactamase OXA-334	Acinetobacter johnsonii
ARO:3001517	OXA-329	AGW16411.1	U3MJT7	blaOXA-329	Beta-lactamase OXA-329	Acinetobacter calcoaceticus
ARO:3001512	OXA-324	AGW16406.1	U3MJT4	blaOXA-324	Beta-lactamase OXA-324	Acinetobacter calcoaceticus
ARO:3001520	OXA-332	AGW16414.1	U3MIZ4	blaOXA-332	Beta-lactamase OXA-332	Acinetobacter calcoaceticus
ARO:3001515	OXA-327	AGW16409.1	U3MIY8	blaOXA-327	Beta-lactamase OXA-327	Acinetobacter calcoaceticus
ARO:3001510	OXA-322	AGW16404.1	U3MIY4	blaOXA-322	Beta-lactamase OXA-322	Acinetobacter calcoaceticus
ARO:3001521	OXA-333	AGW16415.1	U3MI85	blaOXA-333	Beta-lactamase (EC 3.5.2.6)	Acinetobacter johnsonii
ARO:3001516	OXA-328	AGW16410.1	U3MI81	blaOXA-328	Beta-lactamase OXA-328	Acinetobacter calcoaceticus
ARO:3001511	OXA-323	AGW16405.1	U3MI77	blaOXA-323	Beta-lactamase OXA-323	Acinetobacter calcoaceticus
ARO:3002803	QnrVC6	AGH08253.1	U3LP15	---	QnrVC6	Vibrio parahaemolyticus
ARO:3003059	tmrB	CAB12108.2	P12921	tmrB	Tunicamycin resistance protein	Bacillus subtilis (strain 168)
ARO:3003445	Mycobacterium tuberculosis tlyA mutations conferring resistance to aminoglycosides	AAK46002.1	P9WJ62	tlyA	16S/23S rRNA (cytidine-2'-O)-methyltransferase TlyA (EC 2.1.1.226) (EC 2.1.1.227) (16S rRNA (cytidine1409-2'-O)-methyltransferase) (23S rRNA (cytidine1920-2'-O)-methyltransferase) (Hemolysin TlyA)	Mycobacterium tuberculosis (strain CDC 1551 / Oshkosh)
ARO:3002827	tlrC	AAA26832.1	P25256	tlrC	Tylosin resistance ATP-binding protein TlrC	Streptomyces fradiae (Streptomyces roseoflavus)
ARO:3000205	tetX	AAA27471.1	Q01911	tetX	Tetracycline resistance protein from transposon Tn4351/Tn4400	Bacteroides fragilis
ARO:3000192	tetS	AAA25293.1	Q48791	tetS	Tetracycline resistance protein TetS (Tet(S))	Listeria monocytogenes
ARO:3000191	tetQ	CAA79727.1	Q08425	tetQ	Tetracycline resistance protein TetQ (TetA(Q)2)	Bacteroides fragilis
ARO:3000195	tetB(P)	AAA20117.1	Q46306	tetP	Tetracycline resistance protein TetP (TetB(P))	Clostridium perfringens
ARO:3000173	tet(E)	AAA71915.1	Q07282	tetA	Tetracycline resistance protein, class E (TetA(E))	Escherichia coli
ARO:3000179	tet(L)	AAA22851.1	P07561	tet	Tetracycline resistance protein	Geobacillus stearothermophilus (Bacillus stearothermophilus)
ARO:3003554	tcmA	AAA67509.1	P39886	tcmA	Tetracenomycin C resistance and export protein	Streptomyces glaucescens
ARO:3003209	FosA5	AJE60855.1	T2FKA3	fosA5	FosA5 (Fosfomycin resistance protein)	Escherichia coli
ARO:3000559	adeN	AGV28567.1	T2C8L3	adeN	AdeN	Acinetobacter baumannii
ARO:3002359	NDM-9	AGU91756.1	T2A6Y2	blaNDM-9	New Delhi metallo-beta-lactamase	Klebsiella pneumoniae subsp. pneumoniae
ARO:3001687	OXA-316	AGU69254.1	T1YXD5	bla-oxa-316	Beta-lactamase OXA-316	Acinetobacter baumannii
ARO:3001686	OXA-315	AGU69253.1	T1YWL8	bla-oxa-315	Beta-lactamase OXA-315	Acinetobacter baumannii
ARO:3001685	OXA-314	AGU69252.1	T1YW76	bla-oxa-314	Beta-lactamase OXA-314	Acinetobacter baumannii
ARO:3001688	OXA-317	AGU69255.1	T1YW33	bla-oxa-317	Beta-lactamase OXA-317	Acinetobacter baumannii
ARO:3001683	OXA-312	AGU69250.1	T1YW28	bla-oxa-312	Beta-lactamase OXA-312	Acinetobacter baumannii
ARO:3001684	OXA-313	AGU69251.1	T1YUX6	bla-oxa-313	Beta-lactamase OXA-313	Acinetobacter baumannii
ARO:3001828	ACT-23	AGU38146.1	T1WNN5	ampC	Beta-lactamase (EC 3.5.2.6)	Enterobacter cloacae
ARO:3002785	QnrB73	AGT59159.1	T1T4F2	qnrB73	Quinolone resistance protein B73	Citrobacter europaeus
ARO:3003749	salA	AGN74946	T1RRK4	sal(A)	ABC superfamily ATP binding cassette transporter	Staphylococcus sciuri subsp. sciuri
ARO:3000521	mupA	CAA53189	P41368	ileS	Isoleucine--tRNA ligase (EC 6.1.1.5) (Isoleucyl-tRNA synthetase) (IleRS)	Staphylococcus aureus
ARO:3003729	Staphylococcus aureus ileS with mutation conferring resistance to mupirocin	CAA52296.1	P41972	ileS	Isoleucine--tRNA ligase (EC 6.1.1.5) (Isoleucyl-tRNA synthetase) (IleRS)	Staphylococcus aureus
ARO:3002657	APH(6)-Ia	CAA68516.1	P08077	aphD	Streptomycin 6-kinase (EC 2.7.1.72) (APH(6)) (Streptidine kinase) (Streptomycin 6-phosphotransferase)	Streptomyces griseus
ARO:3002658	APH(6)-Ib	CAA29136.1	P18622	sph	Streptomycin 6-kinase (EC 2.7.1.72) (APH(6)) (Streptidine kinase) (Streptomycin 6-phosphotransferase)	Streptomyces glaucescens
ARO:3002659	APH(6)-Ic	CAA25854.1	P13082	str	Streptomycin 3''-kinase (EC 2.7.1.87) (Streptomycin 3''-phosphotransferase) (SPH)	Klebsiella pneumoniae
ARO:3003383	Salmonella serovars soxS with mutation conferring antibiotic resistance	NP_463130.1	Q56143	soxS	Regulatory protein SoxS	Salmonella typhimurium (strain LT2 / SGSC1412 / ATCC 700720)
ARO:3003511	Escherichia coli soxS with mutation conferring antibiotic resistance	NP_418486.1	P0A9E2	soxS	Regulatory protein SoxS	Escherichia coli (strain K12)
ARO:3003382	Salmonella enterica soxR with mutation conferring antibiotic resistance	NP_458564.1	P0A2R1	soxR	Redox-sensitive transcriptional activator SoxR	Salmonella typhi
ARO:3003381	Escherichia coli soxR with mutation conferring antibiotic resistance	AAC77033.1	P0ACS2	soxR	Redox-sensitive transcriptional activator SoxR	Escherichia coli (strain K12)
ARO:3000862	sgm	WP_063978071.1	Q7M0R2	sgm	16S rRNA (guanine(1405)-N(7))-methyltransferase (EC 2.1.1.179) (16S rRNA m7G1405 methyltransferase) (Sisomicin-gentamicin resistance methylase Sgm)	Micromonospora zionensis
ARO:3001962	CTX-M-103	CDG50843.1	S6FS81	bla-CTX-M-103	Beta-lactamase (EC 3.5.2.6)	Escherichia coli
ARO:3001347	SHV-164	CCK86744.1	S6CQJ5	blaSHV-164	Beta-lactamase (EC 3.5.2.6)	Klebsiella pneumoniae
ARO:3002360	NDM-10	AGT37351.1	S5ZIP8	blaNDM-10	Metallo-beta-lactamase NDM-10	Klebsiella pneumoniae subsp. pneumoniae
ARO:3002352	GES-23	AGT20529.1	S5YYN5	---	Beta-lactamase (EC 3.5.2.6) (Fragment)	Pseudomonas aeruginosa
ARO:3002222	IMP-31	AGS82587.1	S5WLJ9	IMP-31	Beta-lactamase (EC 3.5.2.6)	Pseudomonas aeruginosa
ARO:3002116	CMY-104	AGR82311.1	S5PZN8	blaCMY-104	Beta-lactamase (EC 3.5.2.6)	Citrobacter sp. OTESBL0707
ARO:3001793	OXA-320	AGR55864.1	S5N0B5	blaOXA-320	Beta-lactamase (EC 3.5.2.6)	Proteus mirabilis
ARO:3003176	CARB-21	AGQ93789.1	S5IYD2	---	Beta-lactamase (EC 3.5.2.6)	Vibrio parahaemolyticus O1:Kuk str. FDA_R31
ARO:3003761	eatAv	AGQ48857.1	S5FUH0	---	ABC transporter EatAv	Enterococcus faecium (Streptococcus faecium)
ARO:3002829	vgaA	AGN33258.1	S4UZ36	vgaA	ABC superfamily ATP binding cassette transporter	Staphylococcus epidermidis
ARO:3001340	SHV-119	AIG51284.1	S4TWB0	SHV-119	Beta-lactamase (EC 3.5.2.6)	Klebsiella pneumoniae
ARO:3001476	OXA-184	AFO09968.1	S4SG86	OXA-184	Oxacillinase (Oxacillinase OXA-184)	Campylobacter jejuni
ARO:3004086	APH(3')-VIII	EPF73263	S3N4B0	---	Uncharacterized protein	Acinetobacter rudis CIP 110305
ARO:3003470	Mycobacterium tuberculosis gidB mutation conferring resistance to streptomycin	CCP46748.1	P9WGW9	rsmG	Ribosomal RNA small subunit methyltransferase G (EC 2.1.1.-) (16S rRNA 7-methylguanosine methyltransferase) (16S rRNA m7G methyltransferase) (Glucose-inhibited division protein B)	Mycobacterium tuberculosis (strain ATCC 25618 / H37Rv)
ARO:3003395	Mycobacterium tuberculosis rpsL mutations conferring resistance to Streptomycin	AAK44936.1	P9WH62	rpsL	30S ribosomal protein S12	Mycobacterium tuberculosis (strain CDC 1551 / Oshkosh)
ARO:3003930	rpsJ	YP_208874.1	Q5F5S5	rpsJ	30S ribosomal protein S10	Neisseria gonorrhoeae (strain ATCC 700825 / FA 1090)
ARO:3003283	Mycobacterium tuberculosis rpoB mutants conferring resistance to rifampicin	CCP43410.1	P9WGY9	rpoB	DNA-directed RNA polymerase subunit beta (RNAP subunit beta) (EC 2.7.7.6) (RNA polymerase subunit beta) (Transcriptase subunit beta)	Mycobacterium tuberculosis (strain ATCC 25618 / H37Rv)
ARO:3003284	Mycobacterium leprae rpoB mutations conferring resistance to rifampicin	CAC30845.1	P30760	rpoB	DNA-directed RNA polymerase subunit beta (RNAP subunit beta) (EC 2.7.7.6) (RNA polymerase subunit beta) (Transcriptase subunit beta)	Mycobacterium leprae (strain TN)
ARO:3003288	Escherichia coli rpoB mutants conferring resistance to rifampicin	NP_312937.1	P0A8V4	rpoB	DNA-directed RNA polymerase subunit beta (RNAP subunit beta) (EC 2.7.7.6) (RNA polymerase subunit beta) (Transcriptase subunit beta)	Escherichia coli O157:H7
ARO:3001299	tlrB conferring tylosin resistance	AAD12162.1	Q9S1M6	rlmAII	23S rRNA (guanine(748)-N(1))-methyltransferase (EC 2.1.1.188) (23S rRNA m1G748 methyltransferase) (Tylosin-resistance methyltransferase RlmA(II))	Streptomyces fradiae (Streptomyces roseoflavus)
ARO:3000245	RbpA	ADV91011.1	A0QZ11	rbpA	RNA polymerase-binding protein RbpA	Mycobacterium smegmatis (strain ATCC 700084 / mc(2)155)
ARO:3002784	QnrB72	AGN92479.1	R9W034	qnrB72	Plasmid-mediated quinolone resistance protein	Citrobacter sp. TR21_24
ARO:3001999	CTX-M-141	AGN11769.1	R9S6T8	---	Beta-lactamase (EC 3.5.2.6)	Klebsiella pneumoniae
ARO:3003767	Bacillus Cluster B intrinsic mph	EOO80837.1	R8I749	---	Uncharacterized protein	Bacillus cereus K-5975c
ARO:3001504	OXA-309	CCW28916.1	R4ZH62	blaOXA-309	Beta-lactamase OXA-309	Acinetobacter johnsonii
ARO:3002767	QnrB54	CCI51002.2	R4Y3I3	qnrB	Quinolone resistance protein	Citrobacter freundii
ARO:3002993	AQU-1	BAM76830.1	R4WCX0	---	Beta-lactamase (EC 3.5.2.6)	Aeromonas dhakensis
ARO:3002782	QnrB70	AGL43631.1	R4NNA2	---	QnrB70	Citrobacter braakii
ARO:3002777	QnrB65	AGL43626.1	R4NN96	---	QnrB65	Citrobacter freundii
ARO:3002781	QnrB69	AGL43630.1	R4NLJ1	---	QnrB69	Citrobacter freundii
ARO:3002776	QnrB64	AGL43625.1	R4NLI4	---	QnrB64	Citrobacter freundii
ARO:3002783	QnrB71	AGL43632.1	R4NKM8	---	QnrB71	Citrobacter braakii
ARO:3002778	QnrB66	AGL43627.1	R4NKM1	---	QnrB66	Citrobacter freundii
ARO:3001385	TEM-208	AGL39384.1	R4NFA1	TEM-208	Beta-lactamase (EC 3.5.2.6)	Escherichia coli
ARO:3002780	QnrB68	AGL43629.1	R4NDE4	---	QnrB68	Citrobacter braakii
ARO:3002779	QnrB67	AGL43628.1	R4NBM1	---	QnrB67	Citrobacter braakii
ARO:3002082	CMY-69	AGE45504.1	R4IWU8	blaCMY-69	Beta-lactamase (EC 3.5.2.6)	Escherichia coli
ARO:3002162	FOX-10	AGE45503.1	R4IWH1	blaFOX-10	Beta-lactamase (EC 3.5.2.6)	Klebsiella pneumoniae
ARO:3002474	LEN-26	WP_025712239	R4ISB3	---	Beta-lactamase (EC 3.5.2.6)	Klebsiella pneumoniae
ARO:3001988	CTX-M-129	AFJ59956.1	R4I5F7	blaCTX-M-129	Beta-lactamase (EC 3.5.2.6)	Escherichia coli
ARO:3001989	CTX-M-130	AFJ59957.1	R4I5F6	blaCTX-M-130	Beta-lactamase (EC 3.5.2.6)	Escherichia coli
ARO:3002078	CMY-65	AEI52842.1	R4HFT3	blaCMY-65	Beta-lactamase (EC 3.5.2.6)	Citrobacter sp. 913
ARO:3001374	TEM-185	AEG64812.1	R4HET6	blaTEM185	Beta-lactamase (EC 3.5.2.6)	Escherichia coli
ARO:3002718	QnrB4	ABC17630.2	Q2PT27	qnrB4	Pentapeptide repeat protein QnrB4 (Plasmid-mediated quinolone resistance determinant)	Escherichia coli
ARO:3003702	Pseudomonas aeruginosa gyrA and parC conferring resistance to fluoroquinolone	BAA37152.1	Q9ZNQ0	parC	DNA topoisomerase 4 subunit A (EC 5.99.1.3) (Topoisomerase IV subunit A)	Pseudomonas aeruginosa
ARO:3003034	MexX	BAA34299.1	Q9ZNG9	mexX	MexX	Pseudomonas aeruginosa
ARO:3003033	MexY	BAA34300.1	Q9ZNG8	mexY	MexY	Pseudomonas aeruginosa
ARO:3002875	dfrE	AAD01867.1	Q9ZIG0	---	Thymidylate synthase (Fragment)	Enterococcus faecalis (Streptococcus faecalis)
ARO:3002867	dfrF	AAD01868.1	Q9ZIF9	---	Dihydrofolate reductase (EC 1.5.1.3)	Enterococcus faecalis (Streptococcus faecalis)
ARO:3000177	tet(J)	AAD12753.1	Q9ZI83	tetAJ	Tetracycline resistance protein	Proteus mirabilis
ARO:3001417	OXA-22	AAD12233.1	Q9ZHF7	oxa-22	Oxacillinase	Ralstonia pickettii (Burkholderia pickettii)
ARO:3000598	Erm(31)	AAC69327.1	Q9ZGI7	pikR2	rRNA methyltransferase PikR2	Streptomyces venezuelae
ARO:3001265	Erm(30)	AAC69328.1	Q9ZGI6	pikR1	rRNA methyltransferase PikR1	Streptomyces venezuelae
ARO:3001293	desR	AAC68679.1	Q9ZGH5	desR	Beta-glucosidase	Streptomyces venezuelae
ARO:3000882	TEM-10	AAC72362.1	Q9ZFV9	bla TEM-10	Beta-lactamase (EC 3.5.2.6)	Morganella morganii (Proteus morganii)
ARO:3002826	EreA2	AAC78336.1	Q9ZFJ8	ereA2	Erythromycin esterase	Providencia stuartii
ARO:3001074	SHV-15	CAB37325.2	Q9Z4Q6	---	Beta-lactamase (EC 3.5.2.6)	Escherichia coli
ARO:3000561	tet(30)	AAD09860.1	Q9Z479	tetA	Drug efflux protein TetA (Tetracycline resistance protein, class C TetA(C))	Rhizobium radiobacter (Agrobacterium tumefaciens) (Agrobacterium radiobacter)
ARO:3002844	vatE	AAF86220.1	Q9XCL3	satG	SatG protein (Streptogramin A acetyltransferase) (VatE)	Enterococcus faecium (Streptococcus faecium)
ARO:3001815	ACC-1	CAB46491.1	Q9XB24	bla-ACC-1	Beta-lactamase (EC 3.5.2.6)	Klebsiella pneumoniae
ARO:3002271	VIM-1	AAN63496.1	Q9XAY4	blaVIM	Beta-lactamase VIM-1 (Class B carbapenemase VIM-1) (Metallo-beta-lactamase) (Metallo-beta-lactamase VIM-1) (Metallobeta-lactamase) (VIM-1) (VIM-1 metallo-beta lactamase) (VIM-1 metallo-beta-lactamase) (VIM-1 protein)	Pseudomonas aeruginosa
ARO:3002914	vanJ	NP_627787	Q9XAL0	---	Putative membrane protein	Streptomyces coelicolor (strain ATCC BAA-471 / A3(2) / M145)
ARO:3002166	MIR-1	AAD22636.1	Q9X757	MIR-1	Beta-lactamase (EC 3.5.2.6)	Klebsiella pneumoniae
ARO:3003202	TLA-1	AAD37403.1	Q9X6W1	tla-1	Beta-lactamase (EC 3.5.2.6)	Escherichia coli
ARO:3000174	tet(G)	AAD25538.1	Q9X684	tetG	Tetracycline resistance protein	Pseudomonas sp.
ARO:3000183	tet(Z)	AAD25063.1	Q9X544	tetA	Tetracycline resistance protein TetA	Corynebacterium glutamicum (Brevibacterium saccharolyticum)
ARO:3003002	CfxA2	AAD23513.1	Q9X4S7	cfxA2	Beta-lactamase (EC 3.5.2.6)	Prevotella intermedia
ARO:3002256	IND-1	AAD20273.1	Q9X482	ind1	Type II beta-lactamase	Chryseobacterium indologenes
ARO:3002698	cmlB	AAD22144.1	Q9X2P0	cmlB	Chloramphenicol resistance determinant	Enterobacter aerogenes (Aerobacter aerogenes)
ARO:3002194	IMP-3	BAA77393.1	Q9WX48	---	Beta-lactamase (EC 3.5.2.6)	Shigella flexneri
ARO:3002017	CMY-6	CAB36902.1	Q9S6R5	CMY-6	Beta-lactamase (EC 3.5.2.6)	Escherichia coli
ARO:3002018	CMY-7	CAB36900.1	Q9S6R4	CMY-7	Beta-lactamase (EC 3.5.2.6)	Escherichia coli
ARO:3000923	TEM-54	AAD22539.1	Q9S679	blaTEM-54	Beta-lactamase (EC 3.5.2.6)	Escherichia coli
ARO:3000922	TEM-53	AAD22538.1	Q9S678	blaTEM-53	Beta-lactamase (EC 3.5.2.6)	Klebsiella pneumoniae
ARO:3000928	TEM-59	AAD45935.1	Q9S534	TEM-59	Beta-lactamase (EC 3.5.2.6) (Fragment)	Klebsiella oxytoca
ARO:3003479	tetR	CAD09823.1	Q9S455	tetR	TetR (Tetracycline repressor protein)	Salmonella typhi
ARO:3002596	AAC(6')-IIc	AAD46626.1	Q9S445	aac(6')-IIc	Aminoglycoside 6'-N-acetyltransferase	Pseudomonas aeruginosa
ARO:3000936	TEM-70	AAF01046.1	Q9RN48	blaTEM-70	Beta-lactamase (EC 3.5.2.6)	Escherichia coli
ARO:3001871	CTX-M-8	AAF04388.1	Q9RMT4	blaCTX-M-8	Beta-lactamase (EC 3.5.2.6)	Citrobacter amalonaticus
ARO:3000946	TEM-79	AAF05611.1	Q9RMS4	blaTEM-79	Beta-lactamase (EC 3.5.2.6)	Escherichia coli
ARO:3000944	TEM-78	AAF05612.1	Q9RMS3	blaTEM-78	Beta-lactamase (EC 3.5.2.6)	Escherichia coli
ARO:3000942	TEM-76	AAF05613.1	Q9RMS2	blaTEM-76	Beta-lactamase (EC 3.5.2.6)	Escherichia coli
ARO:3000849	SFH-1	AAF09244.1	Q9RMI1	sfhI	Beta-lactamase (EC 3.5.2.6)	Serratia fonticola
ARO:3000193	tetT	AAF01499.1	Q9RLW0	tetT	TetT	Streptococcus pyogenes
ARO:3002606	aadA6	CAJ32504.1	Q9RGC2	aadA6	Streptomycin 3''-adenylyltransferase (EC 2.7.7.47)	Pseudomonas aeruginosa
ARO:3003066	smeR	AAD51348.1	Q9RBZ1	smeR	DNA-binding response regulator (SmeR) (Two-component system response regulator)	Stenotrophomonas maltophilia (Pseudomonas maltophilia) (Xanthomonas maltophilia)
ARO:3003067	smeS	AAD51347.1	Q9RBZ0	smeS	SmeS	Stenotrophomonas maltophilia (Pseudomonas maltophilia) (Xanthomonas maltophilia)
ARO:3003051	smeA	AAD51344.1	Q9RBY9	smeA	SmeA	Stenotrophomonas maltophilia (Pseudomonas maltophilia) (Xanthomonas maltophilia)
ARO:3003052	smeB	AAD51345.1	Q9RBY8	smeB	SmeB	Stenotrophomonas maltophilia (Pseudomonas maltophilia) (Xanthomonas maltophilia)
ARO:3003053	smeC	AAD51346.1	Q9RBY7	smeC	SmeC	Stenotrophomonas maltophilia (Pseudomonas maltophilia) (Xanthomonas maltophilia)
ARO:3000850	GOB-1 beta-lactamase	AAF04458.1	Q9RB00	---	GOB-1 carbapenemase	Elizabethkingia meningoseptica (Chryseobacterium meningosepticum)
ARO:3002580	AAC(6')-Ib9	AAD02244.1	Q9R977	aac(6')-Ib9	Aminoglycoside 6'-N-acetyltransferase	Pseudomonas aeruginosa
ARO:3001075	SHV-16	AAC98092.2	Q9R8D1	---	Beta-lactamase (EC 3.5.2.6)	Klebsiella pneumoniae
ARO:3002678	catB6	CAA11473.1	Q9R818	catB6	CATB6 chloramphenicol acetyltransferase (CatB6 protein)	Pseudomonas aeruginosa
ARO:3000916	TEM-47	CAA71322.1	Q9R771	bla TEM-47	Beta-lactamase (EC 3.5.2.6)	Klebsiella pneumoniae
ARO:3000918	TEM-49	CAA71324.1	Q9R770	bla TEM-49	Beta-lactamase (EC 3.5.2.6)	Escherichia coli
ARO:3000175	tet(H)	CAA75663.1	Q9R758	tetH	Tetracycline resistance efflux protein of class H	Pasteurella multocida
ARO:3000891	TEM-20	CAA76793.1	Q9R748	blaTEM-20	Beta-lactamase (EC 3.5.2.6) (Fragment)	Klebsiella pneumoniae
ARO:3000892	TEM-21	CAA76794.1	Q9R747	blaTEM-21	Beta-lactamase (EC 3.5.2.6) (Fragment)	Klebsiella pneumoniae
ARO:3000893	TEM-22	CAA76795.1	Q9R746	blaTEM-22	Beta-lactamase (EC 3.5.2.6) (Fragment)	Klebsiella pneumoniae
ARO:3000899	TEM-29	CAA76796.1	Q9R745	blaTEM-29	Beta-lactamase (EC 3.5.2.6) (Fragment)	Escherichia coli
ARO:3000921	TEM-52	CAA73933.1	Q9R435	blaTEM-52	Beta-lactamase (EC 3.5.2.6)	Klebsiella pneumoniae
ARO:3000938	TEM-72	AAF19151.1	Q9R429	---	Beta-lactamase (EC 3.5.2.6)	Morganella morganii (Proteus morganii)
ARO:3002605	aadA5	AAF17880.1	Q9R3A9	aadA5	AadA5 aminoglycoside (3'') adenylyltransferase confers resistance to streptomycin and spectinomycin (AadA5 aminoglycoside (3'')(9) adenylyltransferase confers resistance to streptomycin and spectinomycin) (Aminoglycoside 3'-adenylyltransferase A5) (Aminoglycoside adenyltransferase) (Aminoglycoside adenyltransferase ANT(3'')) (Aminoglycoside adenylyltransferase) (Aminoglycoside-3''-adenyltransfera…	Escherichia coli
ARO:3000939	TEM-73	CAB65358.1	Q9R312	bla IRT-18	Beta-lactamase (EC 3.5.2.6)	Proteus mirabilis
ARO:3000943	TEM-77	CAB65358.1	Q9R312	bla IRT-18	Beta-lactamase (EC 3.5.2.6)	Proteus mirabilis
ARO:3003309	Ureaplasma urealyticum parC conferring resistance to fluoroquinolone	WP_010891786.1	Q9PQ23	gyrA	DNA topoisomerase (ATP-hydrolyzing) (EC 5.99.1.3)	Ureaplasma parvum serovar 3 (strain ATCC 700970)
ARO:3001077	SHV-19	AAF34333.1	Q9LAR9	---	Beta-lactamase (EC 3.5.2.6) (Fragment)	Klebsiella pneumoniae
ARO:3001078	SHV-20	AAF34334.1	Q9LAR8	---	Beta-lactamase (EC 3.5.2.6) (Fragment)	Klebsiella pneumoniae
ARO:3001079	SHV-21	AAF34335.1	Q9LAR7	---	Beta-lactamase (EC 3.5.2.6) (Fragment)	Klebsiella pneumoniae
ARO:3001080	SHV-22	AAF34336.1	Q9LAR6	---	Beta-lactamase (EC 3.5.2.6) (Fragment)	Klebsiella pneumoniae
ARO:3001081	SHV-23	AAF34337.1	Q9LAR5	---	Beta-lactamase (EC 3.5.2.6) (Fragment)	Klebsiella pneumoniae
ARO:3001076	SHV-18	AAF64386.1	Q9LAJ9	bla SHV-18	Beta-lactamase (EC 3.5.2.6)	Klebsiella pneumoniae
ARO:3000959	TEM-92	AAF66653.1	Q9LAC0	---	Beta-lactamase (EC 3.5.2.6)	Proteus mirabilis
ARO:3002958	vanYF	AAF36805.1	Q9LA11	vanYF	Putative carboxypeptidase	Paenibacillus popilliae (Bacillus popilliae)
ARO:3002963	vanZF	AAF36806.1	Q9LA10	vanZF	VanZF	Paenibacillus popilliae (Bacillus popilliae)
ARO:3002945	vanHF	AAF36802.1	Q9LA09	vanHE	Putative lactate dehydrogenase VanHE	Paenibacillus popilliae (Bacillus popilliae)
ARO:3002952	vanXF	AAF36804.1	Q9LA08	vanXE	D-alanyl-D-alanine dipeptidase (D-Ala-D-Ala dipeptidase) (EC 3.4.13.22)	Paenibacillus popilliae (Bacillus popilliae)
ARO:3003744	vatF	AAF63432	Q9L9H6	sat	Streptogramin A acetyl transferase (Streptogramin acetyl transferase) (Transferase hexapeptide repeat containing protein) (EC 2.3.1.-)	Yersinia enterocolitica
ARO:3002522	novA	AAF67494.2	Q9L9G7	novA	NovA	Streptomyces niveus (Streptomyces spheroides)
ARO:3001083	SHV-25	AAF37209.2	Q9L8E2	shv-25	Beta-lactamase (EC 3.5.2.6)	Klebsiella pneumoniae
ARO:3001084	SHV-26	AAF36719.1	Q9L760	SHV-26	Beta-lactamase (EC 3.5.2.6)	Klebsiella pneumoniae
ARO:3001423	OXA-28	AAF72942.1	Q9L6X7	oxa-28	Beta-lactamase (EC 3.5.2.6)	Pseudomonas aeruginosa
ARO:3001872	CTX-M-9	AAF05311.2	Q9L5C8	blaCTX-M-9a	Beta-lactamase (EC 3.5.2.6)	Escherichia coli
ARO:3001877	CTX-M-14	AAF72530.1	Q9L5C7	blaCTX-M-14	Beta-lactamase (EC 3.5.2.6)	Escherichia coli
ARO:3001876	CTX-M-13	AAF72531.1	Q9L5C6	blaCTX-M-13	Beta-lactamase (EC 3.5.2.6)	Klebsiella pneumoniae
ARO:3003847	ADC-1	WP_004714775.1	Q9L4R5	ampC	Beta-lactamase (EC 3.5.2.6)	Acinetobacter baumannii
ARO:3001418	OXA-23	AAV65289.1	Q9L4P2	ari-1	Beta-lactamase (Beta-lactamase OXA-23) (Beta-lactamase oxa23) (Carbapenem-hydrolyzing beta-lactamase OXA-23) (Carbapenemase OXA-23) (Class D beta-lactamase) (Class D beta-lactamase Oxa-23) (OXA-23 carbapenemase) (OXA-23 class D beta-lactamase) (OXA23 carbapenemase)	Acinetobacter baumannii
ARO:3002183	MOX-2	CAB82578.1	Q9L3G2	blaMOX-2	Beta-lactamase (EC 3.5.2.6)	Klebsiella pneumoniae
ARO:3002158	FOX-4	CAB89086.1	Q9L387	fox-4	Beta-lactamase (EC 3.5.2.6)	Escherichia coli
ARO:3002193	IMP-2	CAB94707.1	Q9KVZ2	blaIMP-2	Beta-lactamase (EC 3.5.2.6)	Acinetobacter baumannii
ARO:3002330	GES-1	AAF27723.1	Q9KJY7	ges-1	Beta-lactamase (EC 3.5.2.6)	Klebsiella pneumoniae
ARO:3002694	cmlA4	AAF27726.1	Q9KJY5	cmlA4	Chloramphenicol transporter CMLA4	Klebsiella pneumoniae
ARO:3002922	vanRC	AAF86641.1	Q9KJT4	vanRc	Reponse regulator (Response regulator VanRc)	Enterococcus gallinarum
ARO:3002933	vanSC	AAF86642.1	Q9KJT3	vanSc	Sensor-histidine kinase VanSc	Enterococcus gallinarum
ARO:3002019	CMY-8	AAD50818.2	Q9KJJ2	cmy8	Beta-lactamase (EC 3.5.2.6)	Klebsiella pneumoniae
ARO:3001816	ACC-2	AAF86691.1	Q9KJD5	acc-2	Beta-lactamase (EC 3.5.2.6)	Hafnia alvei
ARO:3003069	vanXYG	ABA71732.1	Q9KHL8	vanYG2	D,D-dipeptidase/D,D-carboxypeptidase (D,D-peptidase) (VanXYG)	Enterococcus faecalis (Streptococcus faecalis)
ARO:3001874	CTX-M-11	AAF93177.1	Q9K5K0	---	Beta-lactamase (EC 3.5.2.6) (Fragment)	Klebsiella pneumoniae
ARO:3000935	TEM-68	CAB92324.1	Q9K582	bla-TEM-68	Beta-lactamase (EC 3.5.2.6)	Klebsiella pneumoniae
ARO:3000606	FEZ-1 beta-lactamase	CAB96921.1	Q9K578	blaFEZ-1	FEZ-1 protein (Metallo-beta-lactamase L1) (EC 3.5.2.6)	Fluoribacter gormanii
ARO:3001817	ACC-3	AAF86697.1	Q9K373	acc-3	Beta-lactamase (EC 3.5.2.6) (Fragment)	Hafnia alvei
ARO:3000375	ErmB	AAF86219.1	Q9K2Z3	erm(B)	ErmB (Erythromycin resistance methylase)	Enterococcus faecium (Streptococcus faecium)
ARO:3002272	VIM-2	ABR10840.1	Q9K2N0	blaVIM-2	Beta-lactamase class B VIM-2 (BlaVIM-2) (Metallo beta lactamase VIM-2) (Metallo beta-lactamase) (Metallo-beta lactamase protein) (Metallo-beta-lactamase VIM-2) (VIM-2) (VIM-2 class B beta-lactamase) (VIM-2 class B metallo b-lactamase) (VIM-2 type metallo-beta-lactamase)	Pseudomonas aeruginosa
ARO:3003961	farA	NP_273367.1	Q9K160	farA	Fatty acid efflux system protein	Neisseria meningitidis serogroup B (strain MC58)
ARO:3003962	farB	NP_273368.1	Q9K159	farB	Fatty acid efflux system protein	Neisseria meningitidis serogroup B (strain MC58)
ARO:3000811	mtrD	NP_274718.1	Q9JY67	mtrD	Multiple transferable resistance system protein MtrD	Neisseria meningitidis serogroup B (strain MC58)
ARO:3000810	mtrC	NP_274719.1	Q9JY66	mtrC	Membrane fusion protein	Neisseria meningitidis serogroup B (strain MC58)
ARO:3000582	L1 beta-lactamase	CAB75346.1	Q9JRP7	blaL1	Metallo beta-lactamase	Stenotrophomonas maltophilia (Pseudomonas maltophilia) (Xanthomonas maltophilia)
ARO:3002244	CARB-5	AAF61417.1	Q9JP71	blaCARB-5	Beta-lactamase (EC 3.5.2.6)	Acinetobacter calcoaceticus subsp. anitratus
ARO:3002966	vanXYC	AAF61331.1	Q9JN36	vanXYc	D,D-dipeptidase/D,D-carboxypeptidase (D,D-dipeptidase/D,D-carboxypeptidase VanXYc)	Enterococcus gallinarum
ARO:3003679	TriA	NP_248846.1	Q9I6X6	---	Probable Resistance-Nodulation-Cell Division (RND) efflux membrane fusion protein	Pseudomonas aeruginosa (strain ATCC 15692 / DSM 22644 / CIP 104116 / JCM 14847 / LMG 12228 / 1C / PRS 101 / PAO1)
ARO:3003680	TriB	NP_248847.1	Q9I6X5	---	Probable Resistance-Nodulation-Cell Division (RND) efflux membrane fusion protein	Pseudomonas aeruginosa (strain ATCC 15692 / DSM 22644 / CIP 104116 / JCM 14847 / LMG 12228 / 1C / PRS 101 / PAO1)
ARO:3003681	TriC	NP_248848.1	Q9I6X4	---	Probable Resistance-Nodulation-Cell Division (RND) efflux transporter	Pseudomonas aeruginosa (strain ATCC 15692 / DSM 22644 / CIP 104116 / JCM 14847 / LMG 12228 / 1C / PRS 101 / PAO1)
ARO:3003895	Pseudomonas mutant PhoP conferring resistance to colistin	NP_249870.1	Q9I4F9	phoP	Two-component response regulator PhoP	Pseudomonas aeruginosa (strain ATCC 15692 / DSM 22644 / CIP 104116 / JCM 14847 / LMG 12228 / 1C / PRS 101 / PAO1)
ARO:3003896	Pseudomonas mutant PhoQ conferring resistance to colistin	NP_249871.1	Q9I4F8	phoQ	Two-component sensor PhoQ	Pseudomonas aeruginosa (strain ATCC 15692 / DSM 22644 / CIP 104116 / JCM 14847 / LMG 12228 / 1C / PRS 101 / PAO1)
ARO:3000814	MexT	NP_251182.1	Q9I0Z0	mexT	Transcriptional regulator MexT	Pseudomonas aeruginosa (strain ATCC 15692 / DSM 22644 / CIP 104116 / JCM 14847 / LMG 12228 / 1C / PRS 101 / PAO1)
ARO:3000803	MexE	NP_251183.1	Q9I0Y9	mexE	Resistance-Nodulation-Cell Division (RND) multidrug efflux membrane fusion protein MexE	Pseudomonas aeruginosa (strain ATCC 15692 / DSM 22644 / CIP 104116 / JCM 14847 / LMG 12228 / 1C / PRS 101 / PAO1)
ARO:3000804	MexF	NP_251184.1	Q9I0Y8	mexF	Resistance-Nodulation-Cell Division (RND) multidrug efflux transporter MexF	Pseudomonas aeruginosa (strain ATCC 15692 / DSM 22644 / CIP 104116 / JCM 14847 / LMG 12228 / 1C / PRS 101 / PAO1)
ARO:3000805	OprN	NP_251185.1	Q9I0Y7	oprN	Multidrug efflux outer membrane protein OprN	Pseudomonas aeruginosa (strain ATCC 15692 / DSM 22644 / CIP 104116 / JCM 14847 / LMG 12228 / 1C / PRS 101 / PAO1)
ARO:3004072	OpmB	NP_251215.1	Q9I0V8	---	Probable outer membrane protein	Pseudomonas aeruginosa (strain ATCC 15692 / DSM 22644 / CIP 104116 / JCM 14847 / LMG 12228 / 1C / PRS 101 / PAO1)
ARO:3004075	MuxC	NP_251216.1	Q9I0V7	---	Probable Resistance-Nodulation-Cell Division (RND) efflux transporter	Pseudomonas aeruginosa (strain ATCC 15692 / DSM 22644 / CIP 104116 / JCM 14847 / LMG 12228 / 1C / PRS 101 / PAO1)
ARO:3004074	MuxB	NP_251217.1	Q9I0V6	---	Probable Resistance-Nodulation-Cell Division (RND) efflux transporter	Pseudomonas aeruginosa (strain ATCC 15692 / DSM 22644 / CIP 104116 / JCM 14847 / LMG 12228 / 1C / PRS 101 / PAO1)
ARO:3004073	MuxA	NP_251218.1	Q9I0V5	---	Probable Resistance-Nodulation-Cell Division (RND) efflux membrane fusion protein	Pseudomonas aeruginosa (strain ATCC 15692 / DSM 22644 / CIP 104116 / JCM 14847 / LMG 12228 / 1C / PRS 101 / PAO1)
ARO:3000819	nalD	NP_252264.1	Q9HY46	nalD	NalD	Pseudomonas aeruginosa (strain ATCC 15692 / DSM 22644 / CIP 104116 / JCM 14847 / LMG 12228 / 1C / PRS 101 / PAO1)
ARO:3003693	MexK	AAG07064.1	Q9HXW4	---	Probable Resistance-Nodulation-Cell Division (RND) efflux transporter	Pseudomonas aeruginosa (strain ATCC 15692 / DSM 22644 / CIP 104116 / JCM 14847 / LMG 12228 / 1C / PRS 101 / PAO1)
ARO:3003692	MexJ	NP_252367.1	Q9HXW3	---	Probable Resistance-Nodulation-Cell Division (RND) efflux membrane fusion protein	Pseudomonas aeruginosa (strain ATCC 15692 / DSM 22644 / CIP 104116 / JCM 14847 / LMG 12228 / 1C / PRS 101 / PAO1)
ARO:3003710	MexL	NP_252368.1	Q9HXW2	---	Probable transcriptional regulator	Pseudomonas aeruginosa (strain ATCC 15692 / DSM 22644 / CIP 104116 / JCM 14847 / LMG 12228 / 1C / PRS 101 / PAO1)
ARO:3004056	ArmR	NP_252408.1	Q9HXS2	armR	Antirepressor for MexR, ArmR	Pseudomonas aeruginosa (strain ATCC 15692 / DSM 22644 / CIP 104116 / JCM 14847 / LMG 12228 / 1C / PRS 101 / PAO1)
ARO:3000818	nalC	NP_252410.1	Q9HXS0	nalC	NalC	Pseudomonas aeruginosa (strain ATCC 15692 / DSM 22644 / CIP 104116 / JCM 14847 / LMG 12228 / 1C / PRS 101 / PAO1)
ARO:3000806	MexG	NP_252894.1	Q9HWH6	mexG	Uncharacterized protein	Pseudomonas aeruginosa (strain ATCC 15692 / DSM 22644 / CIP 104116 / JCM 14847 / LMG 12228 / 1C / PRS 101 / PAO1)
ARO:3000807	MexH	NP_252895.1	Q9HWH5	mexH	Probable Resistance-Nodulation-Cell Division (RND) efflux membrane fusion protein	Pseudomonas aeruginosa (strain ATCC 15692 / DSM 22644 / CIP 104116 / JCM 14847 / LMG 12228 / 1C / PRS 101 / PAO1)
ARO:3000808	MexI	NP_252896.1	Q9HWH4	mexI	Probable Resistance-Nodulation-Cell Division (RND) efflux transporter	Pseudomonas aeruginosa (strain ATCC 15692 / DSM 22644 / CIP 104116 / JCM 14847 / LMG 12228 / 1C / PRS 101 / PAO1)
ARO:3000809	OpmD	NP_252897.1	Q9HWH3	opmD	Probable outer membrane protein	Pseudomonas aeruginosa (strain ATCC 15692 / DSM 22644 / CIP 104116 / JCM 14847 / LMG 12228 / 1C / PRS 101 / PAO1)
ARO:3004069	MvaT	NP_253005.1	Q9HW86	mvaT	MvaT (Transcriptional regulator MvaT, P16 subunit)	Pseudomonas aeruginosa (strain ATCC 15692 / DSM 22644 / CIP 104116 / JCM 14847 / LMG 12228 / 1C / PRS 101 / PAO1)
ARO:3003030	MexV	AAG07762.1	Q9HW28	---	Probable Resistance-Nodulation-Cell Division (RND) efflux membrane fusion protein	Pseudomonas aeruginosa (strain ATCC 15692 / DSM 22644 / CIP 104116 / JCM 14847 / LMG 12228 / 1C / PRS 101 / PAO1)
ARO:3003031	MexW	AAG07763.1	Q9HW27	---	Probable Resistance-Nodulation-Cell Division (RND) efflux transporter	Pseudomonas aeruginosa (strain ATCC 15692 / DSM 22644 / CIP 104116 / JCM 14847 / LMG 12228 / 1C / PRS 101 / PAO1)
ARO:3003582	basR	NP_253464.1	Q9HV32	pmrA	PmrA: two-component regulator system response regulator PmrA	Pseudomonas aeruginosa (strain ATCC 15692 / DSM 22644 / CIP 104116 / JCM 14847 / LMG 12228 / 1C / PRS 101 / PAO1)
ARO:3003682	OpmH	NP_253661.1	Q9HUJ1	---	Probable outer membrane protein	Pseudomonas aeruginosa (strain ATCC 15692 / DSM 22644 / CIP 104116 / JCM 14847 / LMG 12228 / 1C / PRS 101 / PAO1)
ARO:3001085	SHV-27	AAG01039.1	Q9FD24	bla-SHV-27	Beta-lactamase (EC 3.5.2.6)	Klebsiella pneumoniae
ARO:3002197	IMP-6	BAB15941.1	Q9FAD5	---	Beta-lactamase (EC 3.5.2.6)	Serratia marcescens
ARO:3000958	TEM-91	BAB16308.1	Q9FAA2	TEM-91	Beta-lactamase (EC 3.5.2.6)	Escherichia coli
ARO:3002020	CMY-9	BAB72158.1	Q9FAA1	blaCMY-9	Class C beta-lactamase	Escherichia coli
ARO:3002258	IND-2a	AAG29760.1	Q9F922	blaIND-13	Class B carbapenemase IND-13 (Metallo-beta-lactamase IND-2a)	Chryseobacterium indologenes
ARO:3002260	IND-4	AAG29765.2	Q9F921	---	Metallo-beta-lactamase IND-4	Chryseobacterium indologenes
ARO:3001073	SHV-14	AAG17550.1	Q9F918	bla	Beta-lactamase (EC 3.5.2.6)	Klebsiella pneumoniae
ARO:3002705	floR	AAG16656.1	Q9F8W2	floR	Florfenicol exporter	Escherichia coli
ARO:3002380	SME-2	AAG29813.1	Q9F7U6	blaSME-2	Beta-lactamase (EC 3.5.2.6)	Serratia marcescens
ARO:3002195	IMP-4	AAK13078.1	Q9F6Z8	blaIMP-4	Beta-lactamase (EC 3.5.2.6)	Acinetobacter baumannii
ARO:3001086	SHV-28	AAG15384.1	Q9F643	blaSHV-28	Beta-lactamase (EC 3.5.2.6)	Klebsiella pneumoniae
ARO:3002273	VIM-3	AAG27703.1	Q9F629	blaVIM-3	BlaVIM-3 (Metallo-beta-lactamase VIM-3) (VIM-3) (VIM-3 metallo-beta-lactamase)	Pseudomonas aeruginosa
ARO:3001430	OXA-36	AAG24866.1	Q9F613	oxa-2-related	Beta-lactamase (EC 3.5.2.6) (Fragment)	Pseudomonas aeruginosa
ARO:3001875	CTX-M-12	AAG34108.1	Q9F5U0	blaCTX-M-12	Beta-lactamase (EC 3.5.2.6)	Klebsiella pneumoniae
ARO:3002159	FOX-5	AAG12974.1	Q9F4K3	FOX-6	Beta-lactamase (EC 3.5.2.6)	Klebsiella pneumoniae
ARO:3001427	OXA-33	AAG23871.1	Q9F4G5	---	Beta-lactamase (EC 3.5.2.6) (Fragment)	Pseudomonas aeruginosa
ARO:3002528	AAC(3)-Ia	AAG15269.1	Q9F3Y6	aacC1 or aacC-A1	Aminoglycoside-(3)-acetyltransferase AAC-(3)-Ia	Pseudomonas aeruginosa
ARO:3003055	smeD	CAC14594.1	Q9F241	smeD	Putative membrane fusion protein	Stenotrophomonas maltophilia (Pseudomonas maltophilia) (Xanthomonas maltophilia)
ARO:3003056	smeE	CAC14595.1	Q9F240	smeE	Putative RND protein	Stenotrophomonas maltophilia (Pseudomonas maltophilia) (Xanthomonas maltophilia)
ARO:3003057	smeF	CAC14596.1	Q9F239	smeF	Outer membrane protein	Stenotrophomonas maltophilia (Pseudomonas maltophilia) (Xanthomonas maltophilia)
ARO:3002825	ErmY	BAB20748.1	Q9F233	ermGM	ErmGM (ErmGM protein)	Staphylococcus aureus
ARO:3001420	OXA-25	AAG35607.1	Q9F0V3	bla-OXA25	Beta-lactamase OXA-25	Acinetobacter baumannii
ARO:3001421	OXA-26	AAG35608.1	Q9F0V2	bla-OXA26	Beta-lactamase OXA-26	Acinetobacter baumannii
ARO:3000954	TEM-87	AAG44570.1	Q9F0F5	---	Beta-lactamase (EC 3.5.2.6)	Proteus mirabilis
ARO:3002133	DHA-2	AAG36927.1	Q9F0D2	bla	Beta-lactamase (EC 3.5.2.6)	Klebsiella pneumoniae
ARO:3002944	vanHD	AAM09850.1	Q9EZR0	vanHD4	Alpha keto acid dehydrogenase (D-lactate dehydrogenase)	Enterococcus faecium (Streptococcus faecium)
ARO:3000005	vanD	AAM09849.1	Q9EZQ9	vanD4	D-alanine--D-alanine ligase (EC 6.3.2.4) (D-Ala-D-Ala ligase) (D-alanylalanine synthetase)	Enterococcus faecium (Streptococcus faecium)
ARO:3001384	TEM-207	AGK40892.1	Q9EYX1	blaTEM-207	Beta-lactamase (EC 3.5.2.6)	Escherichia coli
ARO:3001431	OXA-37	AAG33665.1	Q9EY51	oxa-37	Beta-lactamase (EC 3.5.2.6)	Acinetobacter baumannii
ARO:3001878	CTX-M-15	AAL02127.1	Q9EXV5	blaUOE-1	Beta-lactamase (EC 3.5.2.6)	Escherichia coli
ARO:3002854	dfrA1	CAC19929.1	Q9EXQ6	dfr1	Dihydrofolate reductase	Campylobacter jejuni
ARO:3002515	OCH-2	CAC17622.1	Q9EXA4	bla OCH-2	Beta-lactamase (EC 3.5.2.6)	Ochrobactrum anthropi
ARO:3002516	OCH-3	CAC17623.1	Q9EXA3	bla OCH-3	Beta-lactamase (EC 3.5.2.6)	Ochrobactrum anthropi
ARO:3002517	OCH-4	CAC17624.1	Q9EXA2	bla OCH-4	Beta-lactamase (EC 3.5.2.6)	Ochrobactrum anthropi
ARO:3002518	OCH-5	CAC17625.1	Q9EXA1	bla OCH-5	Beta-lactamase (EC 3.5.2.6)	Ochrobactrum anthropi
ARO:3002519	OCH-6	CAC17626.1	Q9EXA0	bla OCH-6	Beta-lactamase (EC 3.5.2.6)	Ochrobactrum anthropi
ARO:3002520	OCH-7	CAC17627.1	Q9EX99	bla OCH-7	Beta-lactamase (EC 3.5.2.6)	Ochrobactrum anthropi
ARO:3002514	OCH-1	CAC04522.1	Q9EX97	ampC	Beta-lactamase (EC 3.5.2.6)	Ochrobactrum anthropi
ARO:3002259	IND-3	AAG29761.2	Q9EU43	---	Metallo-beta-lactamase IND-3	Chryseobacterium indologenes
ARO:3002257	IND-2	AAG29757.1	Q9ETN2	blaIND-2b	Class B carbapenemase IND-2 (Metallo-beta-lactamase IND-2)	Chryseobacterium indologenes
ARO:3002819	msrC	AAK01167.1	Q9APB1	---	MsrC	Enterococcus faecium (Streptococcus faecium)
ARO:3002238	IMP-47	AAK13430.1	Q9AMR1	blaIMP-8	Beta-lactamase (EC 3.5.2.6)	Klebsiella pneumoniae
ARO:3002199	IMP-8	AAK13430.1	Q9AMR1	blaIMP-8	Beta-lactamase (EC 3.5.2.6)	Klebsiella pneumoniae
ARO:3003711	VEB-1a	AAK14293.1	Q9AMJ7	bla	Beta-lactamase (EC 3.5.2.6)	Pseudomonas aeruginosa
ARO:3002378	VEB-9	AAK14293.1	Q9AMJ7	bla	Beta-lactamase (EC 3.5.2.6)	Pseudomonas aeruginosa
ARO:3003712	VEB-1b	AAK14294.1	Q9AMJ6	bla	Beta-lactamase (EC 3.5.2.6)	Pseudomonas aeruginosa
ARO:3003385	Enterobacter aerogenes omp36 with mutation	AAK11270.1	Q9ALY0	omp36	Osmoporin Omp36	Enterobacter aerogenes (Aerobacter aerogenes)
ARO:3002583	AAC(6')-29a	AAK26252.2	Q9AIK9	aacA29a	6'-N-aminoglycoside acetyltransferase type I (Aminoglycoside acetyltransferase) (Aminoglycoside acetyltransferase AAC(6')-29a) (Aminoglycoside-6'N-acetyltransferase) (Aminoglycoside-6'N-acetyltransferase AAC(6')-29a)	Pseudomonas aeruginosa
ARO:3002584	AAC(6')-29b	ACI31326.1	Q9AIK8	aacA29b	Aminoglycoside acetyltransferase AAC(6')-29b (Aminoglycoside acetyltransferase type I) (Aminoglycoside-6'N-acetyltransferase) (Aminoglycoside-6'N-acetyltransferase AAC(6')-29b)	Pseudomonas aeruginosa
ARO:3002196	IMP-5	AAK27847.1	Q9AHY6	blaIMP-5	Beta-lactamase (EC 3.5.2.6)	Acinetobacter baumannii
ARO:3002337	GES-8	AAK18183.1	Q9AGN8	blaIBC-2	Beta-lactamase (EC 3.5.2.6)	Pseudomonas aeruginosa
ARO:3000931	TEM-63	AAK17194.1	Q9AGJ5	blaTEM-63	Beta-lactamase (EC 3.5.2.6)	Escherichia coli
ARO:3002088	CMY-75	AFK73434.1	Q9AFG8	ampC	Beta-lactamase (EC 3.5.2.6)	Citrobacter freundii
ARO:3002085	CMY-72	AFU25641.1	Q9AFG7	ampC	Beta-lactamase (EC 3.5.2.6)	Citrobacter freundii
ARO:3001428	OXA-34	AAK15582.1	Q9AFD6	bla oxa-34	Beta-lactamase (EC 3.5.2.6) (Fragment)	Pseudomonas aeruginosa
ARO:3000957	TEM-90	AAK30619.1	Q9AFC8	blaTEM-90	Beta-lactamase (EC 3.5.2.6)	Escherichia coli
ARO:3000481	tet(35)	AAK37619.1	Q9AFA3	effJ	Putative tetracycline efflux pump EffJ	Vibrio harveyi (Beneckea harveyi)
ARO:3000955	TEM-88	AAK14792.1	Q9AEY6	---	Beta-lactamase (EC 3.5.2.6)	Klebsiella pneumoniae
ARO:3003374	Enterobacter aerogenes acrR with mutation conferring multidrug antibiotic resistance	CAC35723.1	Q9AEG3	acrR	DNA-binding transcriptional repressor AcrR (Putative AcrR protein) (Transcriptional regulator)	Enterobacter aerogenes (Aerobacter aerogenes)
ARO:3000851	THIN-B beta-lactamase	CAC33832.1	Q9AEF9	blaTHIN-B	THIN-B proetin	Janthinobacterium lividum
ARO:3001424	OXA-29	CAC35728.1	Q9AEF8	blaOXA-29	Beta-lactamase (EC 3.5.2.6)	Fluoribacter gormanii
ARO:3002021	CMY-10	AAK31368.1	Q99QC1	blaCMY-10	Beta-lactamase (EC 3.5.2.6)	Enterobacter aerogenes (Aerobacter aerogenes)
ARO:3002022	CMY-11	AAK31370.1	Q99PX9	blaCMY-11	Beta-lactamase (EC 3.5.2.6)	Escherichia coli
ARO:3001425	OXA-31	AAK52604.1	Q93TY2	BlaoxA31	Beta-lactamase (EC 3.5.2.6)	Pseudomonas aeruginosa
ARO:3001429	OXA-35	AAK49460.1	Q93TX5	bla	Beta-lactamase (EC 3.5.2.6)	Pseudomonas aeruginosa
ARO:3000090	BLA1	AAR20595.1	Q93T42	bla1	Beta-lactamase (EC 3.5.2.6)	Bacillus anthracis
ARO:3001768	OXA-118	AAK55330.1	Q93T29	---	Beta-lactamase (EC 3.5.2.6)	Burkholderia cepacia (Pseudomonas cepacia)
ARO:3002870	tet34	BAB59035.1	Q93R70	tet34	Xanthine phosphoribosyltransferase (EC 2.4.2.22) (Xanthine-guanine phosphoribosyltransferase) (XGPRT)	Vibrio sp. No.6
ARO:3001426	OXA-32	AAK58418.1	Q93PR0	bla oxa-32	Beta-lactamase (EC 3.5.2.6)	Pseudomonas aeruginosa
ARO:3003561	Sed1 beta-lactamase	AAK63223.1	Q93PQ0	---	Beta-lactamase (EC 3.5.2.6)	Citrobacter sedlakii
ARO:3002843	vatD	AAK84316.1	Q93NM2	vatD	Streptogramin A acetyltransferase	Enterococcus faecium (Streptococcus faecium)
ARO:3002312	KPC-2	AAK70220.1	Q93LQ9	KPC-2	Beta-lactamase (EC 3.5.2.6)	Klebsiella pneumoniae
ARO:3000956	TEM-89	AAK71474.1	Q93LJ5	TEM-89	Beta-lactamase (EC 3.5.2.6) (Fragment)	Proteus mirabilis
ARO:3000952	TEM-85	CAC43229.1	Q93K44	bla-TEM-85	Beta-lactamase (EC 3.5.2.6)	Klebsiella pneumoniae
ARO:3000953	TEM-86	CAC43230.1	Q93K43	bla-TEM-86	Beta-lactamase (EC 3.5.2.6)	Klebsiella pneumoniae
ARO:3004041	Klebsiella pneumoniae acrA	CAC41008.1	Q93K41	acrA	AcrA protein	Klebsiella pneumoniae
ARO:3000937	TEM-71	AAL03985.1	Q93GI3	blaTem-71	Beta-lactamase (EC 3.5.2.6)	Klebsiella pneumoniae
ARO:3001881	CTX-M-19	AAK55534.1	Q93F82	bla	Beta-lactamase (EC 3.5.2.6)	Klebsiella pneumoniae
ARO:3002331	GES-2	AAK58421.1	Q93F76	bla GES-2	Beta-lactamase (EC 3.5.2.6)	Pseudomonas aeruginosa
ARO:3002670	cat	AAL08441.1	Q93F28	cat	Chloramphenicol acetyltransferase (EC 2.3.1.28)	Shigella flexneri 2a
ARO:3002635	APH(2'')-IIa	AAK63040.1	Q93ET9	aph(2')-Ib	Aminoglycoside phosphotransferase	Escherichia coli
ARO:3002559	AAC(6')-Ip	AAK63041.1	Q93ET8	aac(6')-Im	Aminoglycoside acetyltransferase	Escherichia coli
ARO:3002313	KPC-3	AAL05630.1	Q93DC4	bla	Beta-lactamase (EC 3.5.2.6)	Klebsiella pneumoniae
ARO:3002198	IMP-7	AAK12087.1	Q93AU3	blaIMP-7	Beta-lactamase (EC 3.5.2.6)	Pseudomonas aeruginosa
ARO:3000948	TEM-81	AAL29433.1	Q93A80	blaTEM-81	Beta-lactamase (EC 3.5.2.6)	Escherichia coli
ARO:3000949	TEM-82	AAL29434.1	Q93A79	blaTEM-82	Beta-lactamase (EC 3.5.2.6)	Escherichia coli
ARO:3000950	TEM-83	AAL29435.1	Q93A78	blaTEM-83	Beta-lactamase (EC 3.5.2.6)	Escherichia coli
ARO:3000951	TEM-84	AAL29436.1	Q93A77	blaTEM-84	Beta-lactamase (EC 3.5.2.6)	Escherichia coli
ARO:3002907	vanE	AAL27442.1	Q93A46	vanE	D-alanine--D-alanine ligase (EC 6.3.2.4) (D-Ala-D-Ala ligase) (D-alanylalanine synthetase)	Enterococcus faecalis (Streptococcus faecalis)
ARO:3002967	vanXYE	AAL27443.1	Q93A45	vanXYE	VanXYE	Enterococcus faecalis (Streptococcus faecalis)
ARO:3002924	vanRE	AAL27445.1	Q93A43	vanRE	VanRE	Enterococcus faecalis (Streptococcus faecalis)
ARO:3002935	vanSE	AAL27446.1	Q93A42	vanSE	VanSE	Enterococcus faecalis (Streptococcus faecalis)
ARO:3000476	tet(31)	CAC80727.1	Q939W3	tetA(31)	Tetracycline pump TetA(31)	Aeromonas salmonicida
ARO:3001879	CTX-M-16	AAK32961.1	Q939N4	---	Beta-lactamase (EC 3.5.2.6)	Escherichia coli
ARO:3001880	CTX-M-17	AAK71471.1	Q939K2	blaCTX-M-17	Beta-lactamase (EC 3.5.2.6)	Klebsiella pneumoniae
ARO:3001090	SHV-32	AAK69828.1	Q939H5	bla-SHV	Beta-lactamase (EC 3.5.2.6)	Klebsiella pneumoniae
ARO:3001091	SHV-33	AFN82060.1	Q939H4	bla-SHV	Beta-lactamase (EC 3.5.2.6)	Klebsiella pneumoniae
ARO:3002455	LEN-2	AAK69830.1	Q939H3	bla-LEN	Beta-lactamase (EC 3.5.2.6)	Klebsiella pneumoniae
ARO:3002403	OXY-2-8	AAL17873.1	Q938A8	bla	Beta-lactamase (EC 3.5.2.6)	Klebsiella oxytoca
ARO:3000962	TEM-95	CAC67290.1	Q937J3	blaTEM-95b	Beta-lactamase (EC 3.5.2.6)	Escherichia coli
ARO:3001883	CTX-M-21	CAD08929.1	Q937J1	blaCTX-M-21	Beta-lactamase (EC 3.5.2.6)	Escherichia coli
ARO:3001882	CTX-M-20	CAC95175.1	Q936V5	blaCTX-M-20	Beta-lactamase (EC 3.5.2.6)	Proteus mirabilis
ARO:3003014	dfrA16	AAK60186.1	Q934B2	dfr16	Dehydrofolate reductase (Dihydrofolate reductase) (Dihydrofolate reductase Dfr16)	Escherichia coli
ARO:3002696	cmlA6	AAK52606.1	Q933G9	CmlA6	CMLA6 (CmlA1 chloramphenicol exporter) (CmlA6)	Pseudomonas aeruginosa
ARO:3000874	TEM-2	CAA38429.1	Q932Y6	bla(tem-2)	Beta-lactamase (EC 3.5.2.6)	Pseudomonas aeruginosa
ARO:3000965	TEM-102	AAK82652.1	Q91UY8	bla	Beta-lactamase TEM-102	Plasmid pWW100
ARO:3000790	mdsB	NP_459346.1	Q8ZRG9	---	Putative cation efflux system protein	Salmonella typhimurium (strain LT2 / SGSC1412 / ATCC 700720)
ARO:3000504	golS	NP_459349.1	Q8ZRG6	---	Putative transcriptional regulator	Salmonella typhimurium (strain LT2 / SGSC1412 / ATCC 700720)
ARO:3003770	Listeria monocytogenes mprF	NP_465220	Q8Y6I9	mprF	Phosphatidylglycerol lysyltransferase (EC 2.3.2.3) (Lysylphosphatidylglycerol synthase)	Listeria monocytogenes serovar 1/2a (strain ATCC BAA-679 / EGD-e)
ARO:3002705	floR	AAL33886.1	Q8VW40	floR	Florfenicol export protein (Florfenicol/chloramphenicol resistance protein)	Klebsiella pneumoniae
ARO:3002705	floR	AAL59749.1	Q8VVN0	floR	Florfenicol exporter	Vibrio cholerae
ARO:3000478	tet(33)	CAD12227.1	Q8VVJ1	tetA(33)	TetA protein (plasmid)	Corynebacterium glutamicum
ARO:3003015	dfrA19	CAC81324.1	Q8VVE6	dfrA19	Dihydrofolate reductase	Salmonella typhimurium
ARO:3000841	CGB-1 beta-lactamase	ABS29619.1	Q8VT48	blaCGB-1b	Carbapenem-hydrolyzing beta-lactamase (Class B carbapenemase CGB-1)	Chryseobacterium gleum
ARO:3002478	LEN-15	AAL50725.1	Q8VQV7	---	Beta-lactamase (EC 3.5.2.6)	Klebsiella pneumoniae
ARO:3002598	ANT(3'')-Ii-AAC(6')-IId fusion protein	AAL51021.2	Q8VQN7	ant(3'')-Ih-aac(6')-IId	Fused aminoglycoside (3'') adenylyltransferase-aminoglycoside (6') acetyltransferase ANT(3'')-Ih-AAC(6')-IId	Serratia marcescens
ARO:3000605	Erm(36)	AAL68827.1	Q8VQ13	ermML	23S ribosomal RNA methyltransferase Erm36 (23S ribosomal RNA methyltransferase ErmML)	Micrococcus luteus (Micrococcus lysodeikticus)
ARO:3002371	VEB-2	AAK29174.1	Q8VPW1	blaVEB-2	Beta-lactamase (EC 3.5.2.6)	Pseudomonas aeruginosa
ARO:3001101	SHV-43	AAL40899.1	Q8VP67	blashv-43	Beta-lactamase (EC 3.5.2.6)	Klebsiella pneumoniae
ARO:3001093	SHV-35	AAL68926.1	Q8VP57	---	Beta-lactamase (EC 3.5.2.6)	Klebsiella pneumoniae
ARO:3000973	TEM-110	AAL68923.1	Q8VP43	---	Beta-lactamase (EC 3.5.2.6)	Klebsiella pneumoniae
ARO:3002202	IMP-11	BAB72072.1	Q8VLM7	blaIMP-11	Beta-lactamase (EC 3.5.2.6)	Acinetobacter baumannii
ARO:3000974	TEM-111	AAL77062.1	Q8RT90	---	Beta-lactamase (EC 3.5.2.6)	Escherichia coli
ARO:3003297	Bartonella bacilliformis gyrA conferring resistance to fluoroquinolones	AAL82403.1	Q8RT68	gyrA	DNA gyrase subunit A (EC 5.99.1.3)	Bartonella bacilliformis
ARO:3003003	CfxA3	AAL79549.2	Q8RT61	cfxA3	Beta-lactamase (EC 3.5.2.6)	Capnocytophaga ochracea
ARO:3002397	OXY-2-2	AAL79541.1	Q8RT60	bla OXY	Beta-lactamase (EC 3.5.2.6)	Klebsiella oxytoca
ARO:3002391	OXY-1-3	AAL78275.1	Q8RSU7	blaOXY	Beta-lactamase (EC 3.5.2.6)	Klebsiella oxytoca
ARO:3002392	OXY-1-4	AAL78276.1	Q8RSU6	blaOXY	Beta-lactamase (EC 3.5.2.6)	Klebsiella oxytoca
ARO:3002401	OXY-2-6	AAL78278.2	Q8RSU5	blaOXY	Beta-lactamase (EC 3.5.2.6)	Klebsiella oxytoca
ARO:3002398	OXY-2-3	AAL78281.2	Q8RSU3	blaOXY	Beta-lactamase (EC 3.5.2.6)	Klebsiella oxytoca
ARO:3000947	TEM-80	AAM15527.1	Q8RPY9	---	Beta-lactamase (EC 3.5.2.6)	Enterobacter cloacae
ARO:3002600	AAC(3)-Ib/AAC(6')-Ib''	AAL82588.1	Q8RPU6	aac(3)-Ib/aac(6')-Ib	Aminoglycoside 3-N-acetyltransferase/aminoglycoside 6'-N-acetyltransferase fusion protein	Pseudomonas aeruginosa
ARO:3001094	SHV-36	AAL82592.1	Q8RNX7	SHV-36a	Beta-lactamase (EC 3.5.2.6)	Klebsiella pneumoniae
ARO:3001095	SHV-37	AAL82593.1	Q8RNX6	bla	Beta-lactamase (EC 3.5.2.6)	Klebsiella pneumoniae
ARO:3003688	PvrR	AAM15533.1	Q8RNJ9	pvrR	Putative response regulator (PvrR)	Pseudomonas aeruginosa
ARO:3001885	CTX-M-23	AAL99990.1	Q8RMW4	---	Beta-lactamase (EC 3.5.2.6)	Escherichia coli
ARO:3000964	TEM-101	AAM18924.1	Q8RMG3	---	Beta-lactamase (EC 3.5.2.6)	Escherichia coli
ARO:3000840	JOHN-1 beta-lactamase	AAK38324.1	Q8RMB8	blaJOHN-1	Beta-lactamase JOHN-1	Flavobacterium johnsoniae (Cytophaga johnsonae)
ARO:3002707	QnrA1	ABI50486.1	Q8RLX6	qnr	Fluoroquinolone resistance protein (Qnr) (QnrA1)	Klebsiella pneumoniae
ARO:3001884	CTX-M-22	AAL86924.1	Q8RLK8	blaCTX-M-22	Beta-lactamase (EC 3.5.2.6)	Klebsiella pneumoniae
ARO:3001419	OXA-24	AAM34291.1	Q8RLA6	blaOXA-33	Beta-lactamase (Beta-lactamase OXA-33) (Betalactamase OXA24) (Carbapenem-hydrolyzing beta-lactamase OXA-40) (Carbapenem-hydrolyzing oxacillinase) (Carbapenem-hydrolyzing oxacillinase OXA-40) (Carbapenemase OXA-24) (Class D beta-lactamase OXA-40) (OXA24 B-lactamase) (Oxa40)	Acinetobacter baumannii
ARO:3002502	PDC-5	ACQ82810.1	Q8RL90	ampC	Beta-lactamase (EC 3.5.2.6)	Pseudomonas aeruginosa
ARO:3002390	OXY-1-2	CAI43413.1	Q8RJ46	blaOXY	Beta-lactamase (EC 3.5.2.6)	Klebsiella oxytoca
ARO:3000971	TEM-108	AAM28884.1	Q8L2F9	tem	Beta-lactamase (EC 3.5.2.6)	Salmonella typhimurium
ARO:3000963	TEM-96	AAM22276.1	Q8L1Y1	---	Beta-lactamase (EC 3.5.2.6)	Escherichia coli
ARO:3002670	cat	BAC11901.1	Q8L0S0	cat	Chloramphenicol acetyltransferase (EC 2.3.1.28)	Streptococcus suis
ARO:3002246	CARB-7	AAM74565.1	Q8KWG8	carb7	Beta-lactamase (EC 3.5.2.6)	Vibrio cholerae non-O1/non-O139
ARO:3000967	TEM-104	AAM61952.1	Q8KSD3	---	Beta-lactamase (EC 3.5.2.6)	Klebsiella pneumoniae
ARO:3000968	TEM-105	AAM61953.1	Q8KSD2	---	Beta-lactamase (EC 3.5.2.6)	Escherichia coli
ARO:3001887	CTX-M-25	AAM70498.1	Q8KSA6	blactx-m-25	Beta-lactamase (EC 3.5.2.6)	Escherichia coli
ARO:3002274	VIM-4	CAJ32502.1	Q8KRJ3	blaVIM-4	Beta-lactamase VIM-4 (Metallo-beta-lactamase) (Metallo-beta-lactamase VIM-4) (VIM-4)	Pseudomonas aeruginosa
ARO:3000978	TEM-115	AAN04881.1	Q8KRH0	blaTEM-115	Beta-lactamase (EC 3.5.2.6)	Klebsiella pneumoniae
ARO:3001098	SHV-40	AAN04882.1	Q8KRG9	blaSHV-40	Beta-lactamase (EC 3.5.2.6)	Klebsiella pneumoniae
ARO:3001099	SHV-41	AAN04883.1	Q8KRG8	blaSHV-41	Beta-lactamase (EC 3.5.2.6)	Klebsiella pneumoniae
ARO:3001100	SHV-42	AAN04884.1	Q8KRG7	blaSHV-42	Beta-lactamase (EC 3.5.2.6)	Klebsiella pneumoniae
ARO:3000969	TEM-106	AAM52207.1	Q8KQ72	blaTEM-106	Beta-lactamase (EC 3.5.2.6)	Escherichia coli
ARO:3000970	TEM-107	AAM52215.1	Q8KQ59	blaTEM-107	Beta-lactamase (EC 3.5.2.6)	Klebsiella pneumoniae
ARO:3003093	CEPH-A3	AAM63403.1	Q8KQ24	cephA3	Beta-lactamase (EC 3.5.2.6)	Aeromonas veronii bv. sobria
ARO:3002695	cmlA5	AAM77075.1	Q8KQ07	cmlA5	Chloramphenicol resistance protein	uncultured bacterium
ARO:3001838	ACT-17	AHM76771.1	Q8KP20	ampC	Beta-lactamase (EC 3.5.2.6)	Enterobacter cloacae
ARO:3000960	TEM-93	CAC85660.1	Q8KMX4	bla-TEM-93	Beta-lactamase (EC 3.5.2.6)	Escherichia coli
ARO:3000961	TEM-94	CAC85661.1	Q8KMX3	bla-TEM-94	Beta-lactamase (EC 3.5.2.6)	Escherichia coli
ARO:3002670	cat	CAC84275.1	Q8KLR2	cat	Chloramphenicol acetyl transferase	Staphylococcus aureus
ARO:3000599	Erm(33)	NP_899170.1	Q8KLN5	erm(33)	Adenine methylase (rRNA methylase)	Staphylococcus sciuri
ARO:3002691	cmlA	CAD31707.1	Q8KLJ6	cmlA	Chloramphenicol transporter	Salmonella typhimurium
ARO:3001769	OXA-42	CAD32564.1	Q8KKG3	oxa	Beta-lactamase (EC 3.5.2.6)	Burkholderia pseudomallei (Pseudomonas pseudomallei)
ARO:3001770	OXA-43	CAD32565.1	Q8KKG2	oxa	Beta-lactamase (EC 3.5.2.6)	Burkholderia pseudomallei (Pseudomonas pseudomallei)
ARO:3000855	CAU-1 beta-lactamase	CAC87665.1	Q8KKG1	blaCAU-1	Metallo-beta-lactamase	Caulobacter vibrioides (Caulobacter crescentus)
ARO:3001797	OXA-46	AFP97030.1	Q8GRH0	blaOXA	Beta-lactamase (EC 3.5.2.6)	Pseudomonas aeruginosa
ARO:3000859	rmtA	BAC20579.1	Q8GRA1	rmtA	16S rRNA methylase	Pseudomonas aeruginosa
ARO:3003551	emeA	BAC11911.1	Q8GR72	emeA	Multidrug efflux pump	Enterococcus faecalis (Streptococcus faecalis)
ARO:3000842	EBR-1 beta-lactamase	AAN32638.1	Q8GQK7	EBR-1	Metallo-beta-lactamase	Empedobacter brevis
ARO:3000843	MUS-1 beta-lactamase	AAN63647.1	Q8GPN2	MUS-1	Metallo-beta-lactamase (Subclass B1 metallo-beta-lactamase)	Myroides odoratimimus
ARO:3000844	TUS-1 beta-lactamase	AAN63648.1	Q8GPN1	---	TUS-1	Myroides odoratus (Flavobacterium odoratum)
ARO:3003552	fusB	AAL12234.1	Q8GNY5	far1	Far1 (FusB) (FusB protein) (Fusidic acid resistance)	Staphylococcus aureus
ARO:3002409	OXY-3-1	AAN28732.1	Q8GNS6	bla	Beta-lactamase (EC 3.5.2.6)	Klebsiella oxytoca
ARO:3002871	tet37	AAN28721.1	Q8GN34	tet37	Tetracycline resistance protein Tet37	uncultured bacterium
ARO:3001103	SHV-45	AAN39364.1	Q8GMX3	---	Beta-lactamase (EC 3.5.2.6)	Klebsiella pneumoniae
ARO:3002410	OXY-4-1	AAL78161.1	Q8GM80	bla	Beta-lactamase (EC 3.5.2.6)	Klebsiella oxytoca
ARO:3002582	AAC(6')-Ib11	AAN41403.1	Q8GLI5	aac(6')-Ib	Aminoglycoside 6-N-acetyltransferase type Ib11	Salmonella typhimurium
ARO:3001775	OXA-119	AAN41427.1	Q8GL69	oxa	Beta-lactamase (EC 3.5.2.6)	uncultured bacterium
ARO:3002864	dfrB1	AAN41433.1	Q8GL63	dfrII	Dihydrofolate reductase	uncultured bacterium
ARO:3002608	aadA8	AAN41439.1	Q8GL59	aadA8	Aminoglycoside-3'-adenylyltransferase	uncultured bacterium
ARO:3001886	CTX-M-24	AAN38836.1	Q8GKX4	blaCTX-M-24	Beta-lactamase (EC 3.5.2.6)	Klebsiella pneumoniae
ARO:3002611	aadA11	AAV32840.1	Q8GKX3	aadA11	Streptomycin 3''-adenylyltransferase (EC 2.7.7.47)	Pseudomonas aeruginosa
ARO:3002275	VIM-5	AAN52134.1	Q8GKX2	blaVIM-5	Class B metallo-beta-lactamase (Meta-beta-carbapenem) (Metallo-beta-lactamase)	Klebsiella pneumoniae
ARO:3003785	Chlamydia trachomatis intrinsic murA conferring resistance to fosfomycin	AAN28945	Q8GKQ2	murA	UDP-N-acetylglucosamine 1-carboxyvinyltransferase (EC 2.5.1.7)	Chlamydia trachomatis
ARO:3003970	D-Ala-D-Ala ligase	AAN62561.1	Q8GJG5	ddl	D-alanine--D-alanine ligase (EC 6.3.2.4) (D-Ala-D-Ala ligase) (D-alanylalanine synthetase)	Enterococcus gallinarum
ARO:3000413	sul3	ACJ63260.1	Q8GJ22	sul3	Dihydropteroate synthase (DHPS) (EC 2.5.1.15) (Dihydropteroate pyrophosphorylase)	Escherichia coli
ARO:3002203	IMP-12	CAD12765.1	Q8GIW8	blaIMP	Metallo beta-lactamase	Pseudomonas putida (Arthrobacter siderocapsulatus)
ARO:3000934	TEM-67	AAD33116.2	Q8GHI3	TEM-67	Beta-lactamase (EC 3.5.2.6)	Proteus mirabilis
ARO:3002693	cmlA1	AAO15535.1	Q8GGX1	cmlA1-variant	Chloramphenicol efflux protein (Chloramphenicol resistance protein cmlA1-variant) (CmlA1)	Klebsiella pneumoniae
ARO:3001096	SHV-38	AAL79576.1	Q8GF08	bla-SHV-38	Beta-lactamase (EC 3.5.2.6)	Klebsiella pneumoniae
ARO:3002923	vanRD	AAM09851.1	Q8GF07	vanRD	Response regulator	Enterococcus faecium (Streptococcus faecium)
ARO:3002957	vanYD	AAM09853.1	Q8GF04	vanYD	Truncated D,D-carboxypeptidase	Enterococcus faecium (Streptococcus faecium)
ARO:3003070	vanXD	AAM09852.1	Q8GF03	vanXD	D-alanyl-D-alanine dipeptidase (D-Ala-D-Ala dipeptidase) (EC 3.4.13.22)	Enterococcus faecium (Streptococcus faecium)
ARO:3000941	TEM-75	AAN05028.1	Q8GEA6	---	Beta-lactamase (EC 3.5.2.6) (Fragment)	Klebsiella pneumoniae
ARO:3000981	TEM-118	AAN05029.1	Q8GEA5	---	Beta-lactamase (EC 3.5.2.6) (Fragment)	Klebsiella oxytoca
ARO:3001097	SHV-39	AAN77730.1	Q8GDE5	---	Beta-lactamase (EC 3.5.2.6) (Fragment)	Klebsiella pneumoniae
ARO:3001888	CTX-M-26	AAN75444.1	Q8GD10	blaCTX-M-26	Beta-lactamase (EC 3.5.2.6)	Klebsiella pneumoniae
ARO:3002276	VIM-6	AAN84550.1	Q8GCU7	blaVIM-6	Metallo-beta-lactamase VIM-6	Pseudomonas putida (Arthrobacter siderocapsulatus)
ARO:3002618	aadA21	AAN87151.1	Q8GCH1	aadA21	Streptomycin 3''-adenylyltransferase (EC 2.7.7.47)	Salmonella typhimurium
ARO:3000900	TEM-30	CAD24670.1	Q8GA85	bla	Beta-lactamase (EC 3.5.2.6)	Escherichia coli
ARO:3003793	SPM-1	CAD37801.1	Q8G9Q0	spm-1	Beta-lactamase IMP-1 (Beta-lactamase SPM-1) (EC 3.5.2.6) (Metallo-b-lactamase) (Metallo-beta-lactamase blaSPM-1) (SPM-1)	Pseudomonas aeruginosa
ARO:3002604	aadA4	AAN34365.1	Q8G8F9	aadA4	Adenylyltransferase AadA4 (Aminoglycoside adenylyltransferase)	Acinetobacter baumannii
ARO:3000614	mefE	NP_358565.1	Q8DPW8	mefE	ABC transporter membrane-spanning permease-macrolide efflux	Streptococcus pneumoniae (strain ATCC BAA-255 / R6)
ARO:3000025	patB	NP_358969.1	Q8DP38	patB	Aminotransferase (EC 2.6.1.-)	Streptococcus pneumoniae (strain ATCC BAA-255 / R6)
ARO:3003151	CARB-22	BAC61820.1	Q87IX9	---	Beta-lactamase (EC 3.5.2.6)	Vibrio parahaemolyticus serotype O3:K6 (strain RIMD 2210633)
ARO:3000879	TEM-7	AAO33760.1	Q84HU2	---	Beta-lactamase (EC 3.5.2.6) (Fragment)	Escherichia coli
ARO:3000980	TEM-117	AAN05026.1	Q84H50	---	Beta-lactamase (EC 3.5.2.6) (Fragment)	Escherichia coli
ARO:3002475	LEN-3	AAN05030.1	Q84H48	---	Beta-lactamase (EC 3.5.2.6) (Fragment)	Klebsiella pneumoniae
ARO:3002472	LEN-4	AAN05031.1	Q84H47	---	Beta-lactamase (EC 3.5.2.6) (Fragment)	Klebsiella pneumoniae
ARO:3000167	tet(C)	AAO16462.1	Q84GH7	tetC	Putative tetracycline resistance protein (Fragment)	uncultured bacterium
ARO:3002623	ANT(4')-Ia	AAO83986.1	Q84DL7	aadD2	Aminoglycoside 4'-O-nucleotidyltransferase (Aminoglycoside nucleotidyltransferase)	Bacillus clausii
ARO:3000166	tet(B)	BAC67143.1	Q84BS6	tetB	TetB protein	Gram-negative bacterium TC71
ARO:3002168	MIR-2	AAO42602.1	Q84B25	mir2	Beta-lactamase (EC 3.5.2.6)	Enterobacter cloacae
ARO:3002670	cat	NP_863168.1	Q848T3	cat	Chloramphenicol acetyltransferase (EC 2.3.1.28)	Enterococcus faecium (Streptococcus faecium)
ARO:3001113	SHV-57	AAO66446.1	Q846Q1	blaSHV	Beta-lactamase (EC 3.5.2.6)	Escherichia coli
ARO:3003094	imiH	CAD69003.1	Q845L6	imiH	Beta-lactamase (EC 3.5.2.6)	Aeromonas hydrophila
ARO:3001890	CTX-M-28	CAD70280.1	Q845L5	blaCTX-M-28	Beta-lactamase (EC 3.5.2.6)	Escherichia coli
ARO:3000982	TEM-120	AAO85882.1	Q844X1	blaTEM-120	Beta-lactamase (EC 3.5.2.6)	Klebsiella oxytoca
ARO:3001895	CTX-M-33	AAO88912.1	Q842S3	bla	Beta-lactamase (EC 3.5.2.6)	Escherichia coli
ARO:3001894	CTX-M-32	CAD89606.1	Q842A4	ctx-M-32	Beta-lactamase (EC 3.5.2.6)	Escherichia coli
ARO:3001105	SHV-48	AAP03063.1	Q840S0	---	Beta-lactamase (EC 3.5.2.6)	Klebsiella pneumoniae
ARO:3002277	VIM-7	CAD61201.1	Q840P9	blaVIM-7	Metallo-b-lactamase (Metallo-beta-lactamase VIM-7)	Pseudomonas aeruginosa
ARO:3001889	CTX-M-27	AAO61597.1	Q840M4	blaCTX-M-27	Beta-lactamase (EC 3.5.2.6)	Escherichia coli
ARO:3002675	catB2	NP_848167.1	Q83ZX9	catB2	Chloramphenicol acetyltransferase	Pasteurella multocida
ARO:3002848	arr-3	ACD56151.1	Q83ZU8	arr-3	ADP-ribosylating transferase (Aar-3) (NAD(+)--rifampin ADP-ribosyltransferase Arr-3) (Rifampin ADP-ribosyl transferase) (Rifampin ADP-ribosylating transferase) (Rifampin ADP-ribosylating transferase ARR-2)	Escherichia coli
ARO:3001891	CTX-M-29	AAP22736.1	Q83ZQ7	blaCTX-M-29	Beta-lactamase (EC 3.5.2.6)	Escherichia coli
ARO:3002336	GES-7	AAP22974.1	Q83ZP8	blaIBC-1	Beta-lactamase (EC 3.5.2.6)	Escherichia coli
ARO:3001856	CFE-1	BAC76072.1	Q83ZC8	ampC	Beta-lactamase (EC 3.5.2.6)	Escherichia coli
ARO:3003318	Streptomyces rishiriensis parY mutant conferring resistance to aminocoumarin	AAO47226.2	Q83WB8	parYR	DNA topoisomerase (ATP-hydrolyzing) (EC 5.99.1.3)	Streptomyces rishiriensis
ARO:3000911	TEM-42	CAA66659.1	Q83W48	bla TEM-42	Beta-lactamase (EC 3.5.2.6) (Fragment)	Pseudomonas aeruginosa
ARO:3002625	ANT(4')-IIb	AAM76670.1	Q83V96	ant4'-IIb	Aminoglycoside nucleotidyltransferase	Pseudomonas aeruginosa
ARO:3003848	ADC-2	WP_004746565.1	Q83V94	aba-1	Beta-lactamase (EC 3.5.2.6)	Oligella urethralis
ARO:3002247	CARB-8	AAO59455.1	Q83V93	blaCARB-8	Beta-lactamase (EC 3.5.2.6)	Oligella urethralis
ARO:3003849	ADC-3	WP_063857798.1	Q83V92	ampC	Beta-lactamase (EC 3.5.2.6)	Acinetobacter baumannii
ARO:3003850	ADC-4	WP_063857801.1	Q83V91	ampC	Beta-lactamase (EC 3.5.2.6)	Acinetobacter baumannii
ARO:3002531	AAC(3)-Ic	CAD53575.1	Q83V16	aac(3)-Ic	Aac(3) Ic (Aac(3)-Ic) (Aminoglycoside acetyltransferase)	Pseudomonas aeruginosa
ARO:3003815	Enterococcus faecalis YvlB with mutation conferring daptomycin resistance	NP_815456	Q834B6	---	Uncharacterized protein	Enterococcus faecalis (strain ATCC 700802 / V583)
ARO:3003813	Enterococcus faecalis drmA with mutation conferring daptomycin resistance	NP_815496	Q833X7	---	Uncharacterized protein	Enterococcus faecalis (strain ATCC 700802 / V583)
ARO:3003800	Enterococcus faecalis gdpD with mutation conferring daptomycin resistance	NP_815586	Q833P0	---	Glycerophosphoryl diester phosphodiesterase family protein	Enterococcus faecalis (strain ATCC 700802 / V583)
ARO:3002916	vanV	AAO82019.1	Q832D8	---	Uncharacterized protein	Enterococcus faecalis (strain ATCC 700802 / V583)
ARO:3003792	Enterococcus faecalis liaR mutant conferring daptomycin resistance	NP_816529	Q82ZY6	---	DNA-binding response regulator, LuxR family	Enterococcus faecalis (strain ATCC 700802 / V583)
ARO:3003791	Enterococcus faecalis liaS mutant conferring daptomycin resistance	AAO82600.1	Q82ZY5	---	Sensor histidine kinase (EC 2.7.13.3)	Enterococcus faecalis (strain ATCC 700802 / V583)
ARO:3003077	Enterococcus faecalis liaF mutant conferring daptomycin resistance	AAO82601.1	Q82ZY4	---	Uncharacterized protein	Enterococcus faecalis (strain ATCC 700802 / V583)
ARO:3001671	OXA-49	AAP40270.1	Q7X5F1	blaOXA-49	Beta-lactamase OXA-49	Acinetobacter baumannii
ARO:3001107	SHV-50	AAP41108.1	Q7X5A6	blaSHV-50	Beta-lactamase (EC 3.5.2.6)	Klebsiella pneumoniae
ARO:3001892	CTX-M-30	AAP43508.1	Q7X587	---	Beta-lactamase (EC 3.5.2.6)	Citrobacter freundii
ARO:3001108	SHV-51	AAP41944.1	Q7X4G3	blaSHV-51	Beta-lactamase (EC 3.5.2.6)	Klebsiella pneumoniae
ARO:3001893	CTX-M-31	CAD99181.1	Q7X210	bla	Beta-lactamase (EC 3.5.2.6)	Providencia sp. 4440
ARO:3001794	OXA-45	CAD58780.1	Q7WZC7	oxa45	Oxacillinase (EC 3.5.2.6) (Oxacillinase Oxa45)	Pseudomonas aeruginosa
ARO:3002611	aadA11	CAD99015.1	Q7WZ39	aadA11	Streptomycin 3''-adenylyltransferase (EC 2.7.7.47)	Escherichia coli
ARO:3003835	cdeA	CAE00499.1	Q7WZ38	eA	EA protein (Putative drug/sodium antiporter, MATE family)	Clostridioides difficile (Peptoclostridium difficile)
ARO:3003851	ADC-5	WP_038405930.1	Q7WZ37	ampC	Beta-lactamase (EC 3.5.2.6)	Acinetobacter pittii (Acinetobacter genomosp. 3)
ARO:3001102	SHV-44	AAP82228.1	Q7WYH2	---	Beta-lactamase (EC 3.5.2.6)	Klebsiella pneumoniae
ARO:3002204	IMP-13	CAD80251.1	Q7WYA8	bla-imp13	Beta-lactamase (EC 3.5.2.6)	Pseudomonas aeruginosa
ARO:3003111	lsaB	NP_899166.1	Q7WVB8	---	ABC transporter	Staphylococcus sciuri
ARO:3003047	qacB	AAQ10694.1	Q7WUJ3	qacB	Multidrug efflux protein QacB	Staphylococcus aureus
ARO:3002024	CMY-13	AAQ16660.2	Q7WUG6	cmy-13	Beta-lactamase (EC 3.5.2.6)	Escherichia coli
ARO:3001810	OXA-53	AAP43641.1	Q7WTW0	oxa-53	Beta-lactamase (EC 3.5.2.6)	Salmonella enterica subsp. enterica serovar Agona
ARO:3002588	AAC(6')-I30	AAP43642.1	Q7WTV9	aac(6')-I30	6'-N-aminoglycoside acetyltransferase	Salmonella enterica subsp. enterica serovar Agona
ARO:3000197	tet36	CAD55718.1	Q7WT01	tet(36)	Ribosomal protection tetracycline resistance protein	Bacteroides coprosuis
ARO:3002201	IMP-10	BAB72069.1	Q7DH52	blaIMP-10	Beta-lactamase (EC 3.5.2.6)	Pseudomonas aeruginosa
ARO:3000412	sul2	AAL59753.1	Q7DFV9	sulII	Dihydropteroate synthase (DHPS) (EC 2.5.1.15) (Dihydropteroate pyrophosphorylase)	Vibrio cholerae
ARO:3000230	ANT(2'')-Ia	AAC64365.1	Q7BSQ4	aadB	2''-aminoglycoside nucleotidyltransferase (AadB) (Aminoglycoside (2'') adenylyltransferase AAD (2'')) (Aminoglycoside adenyltransferase) (Aminoglycoside adenylyltransferase) (Aminoglycoside nucleotidyltransferase) (Aminoglycoside(2'')adenylyltransferase AAD(2'')) (Aminoglycoside-2''-adenyltransferase) (Aminoglycoside-2''-adenylyltransferase) (Aminoglycoside-modifying enzyme)	Pseudomonas aeruginosa
ARO:3002925	vanRF	AAR84672.1	Q7BQ78	vanRF	Two-component response regulator	Paenibacillus popilliae (Bacillus popilliae)
ARO:3002936	vanSF	AAR84673.1	Q7BQ77	vanSF	Two-component sensor histidine kinase	Paenibacillus popilliae (Bacillus popilliae)
ARO:3002602	aadA2	AAF27727.1	Q7BQ67	aadA2	Streptomycin 3''-adenylyltransferase (EC 2.7.7.47)	Klebsiella pneumoniae
ARO:3001405	OXA-10	AAG45720.1	Q7BNC2	blaoxa-10	Beta-lactamase (EC 3.5.2.6)	Escherichia coli
ARO:3002682	catD	AAF66228.1	Q7BN00	catD	Chloramphenicol acetyltransferase (EC 2.3.1.28)	Clostridioides difficile (Peptoclostridium difficile)
ARO:3002546	AAC(6')-Ib	AAX54878.1	Q7BM49	aac(6')-Ib	6'-N-aminoglycoside acetyltransferase Ib' (AAC(6')-Ib) (AAC6'-Ib) (AacA4) (Aminoglycoside (6') N-acetyltransferase) (Aminoglycoside (6') acetyltransferase) (Aminoglycoside (6')-N-acetyltransferase Ib') (Aminoglycoside 6'-N-acetyltransferase) (Aminoglycoside N(6')-acetyltransferase) (Aminoglycoside acetyltranferase Aac(6')-Ib)	Pseudomonas aeruginosa
ARO:3002705	floR	AAK02049.1	Q7BL41	flo	Chloramphenicol and florfenicol resistance protein	Salmonella typhimurium
ARO:3002240	CARB-1	AAK96394.1	Q7BHK2	blaP1a	Beta-lactamase (EC 3.5.2.6)	Pseudomonas aeruginosa
ARO:3002685	catIII	CAB75601.1	Q7B0A8	catIII	Chloramphenicol acetyltransferase (EC 2.3.1.28)	uncultured bacterium
ARO:3002895	SAT-1	BAD95494.1	Q7AJI1	sat	Sat1 (Sat2) (Sat2 streptothricin acetyltransferase) (Streptomycin acetyltransferase) (Streptothricin N-acetyltransferase Sat1) (Streptothricin acetyl transferase) (Streptothricin acetyltransferase) (Streptothricin acetyltransferase 2) (TDP-fucosamine acetyltransferase)	Escherichia coli
ARO:3002576	AAC(6')-Ib3	ACS44715.1	Q79TB7	aacA4	AAC(6')-Ib aminoglycoside acetyltransferase (AAC(6')-Ib aminoglycosides acetyltransferase) (ACC (6')-Ib) (Aminoglycoside 6'-N-acetyltransferase Ib) (Aminoglycoside 6'-N-acetyltransferase type I) (Aminoglycoside acetyltransferase (6') type I)	Acinetobacter baumannii
ARO:3002594	AAC(6')-IIa	AAM92464.1	Q79PC7	aac6-II	Aminoglycoside 6'-n-acetyltransferase	Salmonella typhi
ARO:3003011	dfrA10	AHG97174.1	Q79PC3	dfrA10	DfrA10, formerly DHFRX, dihydrofolatereductase	Klebsiella pneumoniae
ARO:3002192	IMP-1	CAA11471.1	Q79MP6	blaIMP-1	Beta-lactamase (EC 3.5.2.6)	Pseudomonas aeruginosa
ARO:3001089	SHV-31	AAP33454.2	Q79JA5	blaSHV-31	Beta-lactamase (EC 3.5.2.6)	Klebsiella pneumoniae
ARO:3003021	dfrB2	FAA00064.1	Q79D79	dfrB2	Dihydrofolate reductase (EC 1.5.1.3)	Escherichia coli
ARO:3002866	dfrD	AAA85213.1	Q79CE5	dfrD	Dihydrofolate reductase (EC 1.5.1.3)	Listeria monocytogenes
ARO:3000250	ErmC	CAA57985.1	Q79AA6	ermC	Adenine methylase	Staphylococcus equorum subsp. equorum
ARO:3002898	SAT-3	CAA88265.1	Q798S0	sat3	Streptothricin acetyltransferase	Escherichia coli
ARO:3002573	AAC(6')-Iae	BAD14386.1	Q76FR4	aac(6')-Iae	AAC(6')-Iae aminoglycosides acetyltransferase (Aminoglycoside acetyltransferase)	Pseudomonas aeruginosa
ARO:3002332	GES-3	BAD06399.1	Q767E8	blaGES-3	Beta-lactamase (EC 3.5.2.6)	Klebsiella pneumoniae
ARO:3002607	aadA7	BAD00739.1	Q766G9	aadA7	Streptomycin 3''-adenylyltransferase (EC 2.7.7.47)	Vibrio fluvialis
ARO:3002563	AAC(6')-Isa	BAD10948.2	Q764C8	kat	Kanamycin acetyltransferase	Streptomyces albulus
ARO:3002333	GES-4	BAD08689.1	Q764B7	blaGES-4	Beta-lactamase (EC 3.5.2.6)	Klebsiella pneumoniae
ARO:3000860	rmtB	YP_001816610.1	Q763K9	rmtB	16S rRNA methylase (16S rRNA methylase RmtB) (16S rRNA methyltransferase) (16S ribosomal RNA methylase) (RmtB) (RmtB protein)	Escherichia coli
ARO:3002572	AAC(6')-Iad	BAD12078.1	Q75ZP9	aac(6')-Iad	Aminoglycoside N(6')-acetyltransferase type 1 (EC 2.3.1.82) (Aminoglycoside resistance protein)	Acinetobacter pittii (Acinetobacter genomosp. 3)
ARO:3002593	AAC(6')-Ib-SK	BAD11815.1	Q75PS3	kac	Aminoglycoside 6'-N-acetyltransferase (Kanamycin 6'-acetyltransferase)	Streptomyces kanamyceticus
ARO:3001898	CTX-M-36	BAD16611.1	Q75NB4	blaCTX-M-36	Beta-lactamase (EC 3.5.2.6)	Escherichia coli
ARO:3002704	fexA	CAD70268.1	Q70T11	fexA	Florfenicol-chloramphenicol exporter	Staphylococcus lentus
ARO:3002026	CMY-15	CAD88477.1	Q70Q39	blaCMY-15	Beta-lactamase (EC 3.5.2.6)	Proteus mirabilis
ARO:3002025	CMY-14	CAD88479.1	Q70Q38	blaCMY-14	Beta-lactamase (EC 3.5.2.6)	Proteus mirabilis
ARO:3002207	IMP-16	CAE48334.1	Q70E85	blaIMP-16	Beta-lactamase (EC 3.5.2.6)	Pseudomonas aeruginosa
ARO:3002599	AAC(6')-30/AAC(6')-Ib' fusion protein	CAE48335.2	Q70E84	aac(6')-30/aac(6')-Ib'	AAC(6')-30/AAC(6')-Ib'	Pseudomonas aeruginosa
ARO:3003676	AAC(6')-Ib'	AAT74613.1	Q70E83	aacA4	AAC(6')-Ib' (Aminoglycoside acetyltransferase) (Aminoglycoside-6-N-acetyltransferase) (Aminoglycoside-acetyltransferase)	Pseudomonas aeruginosa
ARO:3002589	AAC(6')-Iid	CAE50925.1	Q70E72	aac(6')-Ii	Aminoglycoside acetyltransferase	Enterococcus hirae
ARO:3002590	AAC(6')-Iih	CAE50926.1	Q70E71	aac(6')-Ii	Aminoglycoside acetyltransferase	Enterococcus durans
ARO:3000845	GIM-1	CAF05908.1	Q704V1	blaGIM-1	GIM-1 protein (Metallo-beta-lactamase GIM-1)	Pseudomonas aeruginosa
ARO:3000391	norA	AAS68233.1	Q703J0	norA	NorA (NorA protein)	Staphylococcus epidermidis
ARO:3002281	VIM-11	AAT36613.1	Q700T0	blaVIM	Class B beta-lactamase (Metallo-beta lactamase protein) (VIM-11)	Pseudomonas aeruginosa
ARO:3001771	OXA-57	CAF74882.1	Q6ZZZ2	oxa-57	Beta-lactamase (EC 3.5.2.6)	Burkholderia pseudomallei (Pseudomonas pseudomallei)
ARO:3001772	OXA-59	CAG15145.1	Q6ZZU6	oxa-59	Beta-lactamase (EC 3.5.2.6)	Burkholderia pseudomallei (Pseudomonas pseudomallei)
ARO:3000999	TEM-135	CAG25427.1	Q6ZYM6	blaTEM	Beta-lactamase (EC 3.5.2.6)	Salmonella typhimurium
ARO:3002418	OKP-A-1	CAG25812.2	Q6ZY77	blaOKP-A	Beta-lactamase (EC 3.5.2.6)	Klebsiella pneumoniae
ARO:3002434	OKP-B-1	CAG25813.2	Q6ZY76	blaOKP	Beta-lactamase (EC 3.5.2.6)	Klebsiella pneumoniae
ARO:3002463	LEN-13	CAG25814.1	Q6ZY75	blaLEN	Beta-lactamase (EC 3.5.2.6) (Fragment)	Klebsiella pneumoniae
ARO:3002419	OKP-A-2	CAG25815.2	Q6ZY74	blaOKP	Beta-lactamase (EC 3.5.2.6)	Klebsiella pneumoniae
ARO:3002462	LEN-12	CAG25817.1	Q6ZY72	blaLEN	Beta-lactamase (EC 3.5.2.6) (Fragment)	Klebsiella pneumoniae
ARO:3002461	LEN-11	CAG25828.1	Q6ZY61	blaLEN	Beta-lactamase (EC 3.5.2.6) (Fragment)	Klebsiella pneumoniae
ARO:3002460	LEN-10	CAG25830.1	Q6ZY59	blaLEN	Beta-lactamase (EC 3.5.2.6) (Fragment)	Klebsiella pneumoniae
ARO:3002445	OKP-B-12	CAG25831.1	Q6ZY58	blaOKP	Beta-lactamase (EC 3.5.2.6) (Fragment)	Klebsiella pneumoniae
ARO:3002459	LEN-9	CAG25834.1	Q6ZY55	blaLEN	Beta-lactamase (EC 3.5.2.6) (Fragment)	Klebsiella pneumoniae
ARO:3002458	LEN-8	CAG25835.1	Q6ZY54	blaLEN	Beta-lactamase (EC 3.5.2.6) (Fragment)	Klebsiella pneumoniae
ARO:3002457	LEN-7	CAG25836.1	Q6ZY53	blaLEN	Beta-lactamase (EC 3.5.2.6) (Fragment)	Klebsiella pneumoniae
ARO:3001956	CTX-M-96	CAG28417.1	Q6ZXB6	blaCTX-M-12 variant	Beta-lactamase (EC 3.5.2.6)	Klebsiella pneumoniae
ARO:3003100	cphA4	AAP69912.1	Q6XL60	cphA4	Beta-lactamase (EC 3.5.2.6)	Aeromonas allosaccharophila
ARO:3003101	cphA5	AAP69913.1	Q6XL59	cphA5	Class B beta-lactamase	Aeromonas salmonicida
ARO:3003102	cphA6	AAP69914.1	Q6XL58	cphA6	Beta-lactamase (EC 3.5.2.6)	Aeromonas veronii
ARO:3001780	OXA-85	AAP69916.1	Q6XL56	fus1	Class D beta-lactamase	Fusobacterium nucleatum
ARO:3000600	Erm(34)	AAP74657.1	Q6XFQ7	---	Ribosomal methylase Erm34	Bacillus clausii
ARO:3001782	OXA-48	AAP70012.1	Q6XEC0	bla OXA-48	Beta-lactamase (EC 3.5.2.6)	Klebsiella pneumoniae
ARO:3001781	OXA-47	AAP69225.1	Q6XDA9	---	Beta-lactamase (EC 3.5.2.6)	Klebsiella pneumoniae
ARO:3002670	cat	AAQ63644.1	Q6XD71	cat	Chloramphenicol acetyltransferase	Bacillus clausii
ARO:3002248	CARB-9	AAP22374.1	Q6X9D7	carb9	Beta-lactamase (EC 3.5.2.6)	Vibrio cholerae non-O1/non-O139
ARO:3003104	cphA8	AAP97129.1	Q6X1Z3	cphA8	Class B beta-lactamase	Aeromonas sobria
ARO:3002477	LEN-14	AAP93847.1	Q6WWY1	blaLEN	Beta-lactamase (EC 3.5.2.6) (Fragment)	Enterobacter cloacae
ARO:3002476	LEN-6	AAP93848.1	Q6WWY0	blaLEN	Beta-lactamase (EC 3.5.2.6) (Fragment)	Klebsiella pneumoniae
ARO:3000983	TEM-121	AAQ01671.1	Q6WSQ7	blaTEM-121	Beta-lactamase (EC 3.5.2.6)	Escherichia coli
ARO:3000575	vanU	ABA71726.1	Q6WRY9	vanUG	Predicted transcriptional regulator (VanU)	Enterococcus faecalis (Streptococcus faecalis)
ARO:3002926	vanRG	ABA71727.1	Q6WRY8	vanRG	Response regulator (VanRG)	Enterococcus faecalis (Streptococcus faecalis)
ARO:3002937	vanSG	ABA71728.1	Q6WRY7	vanSG	Histidine protein kinase (VanSG)	Enterococcus faecalis (Streptococcus faecalis)
ARO:3002909	vanG	ABA71731.1	Q6WRY5	vanG	D-alanine--D-alanine ligase (EC 6.3.2.4) (D-Ala-D-Ala ligase) (D-alanylalanine synthetase)	Enterococcus faecalis (Streptococcus faecalis)
ARO:3002972	vanTG	ABA71733.1	Q6WRY3	vanTG	Alanine racemase (EC 5.1.1.1)	Enterococcus faecalis (Streptococcus faecalis)
ARO:3002400	OXY-2-5	CAG34107.1	Q6W8V8	blaOXY2b	Beta-lactamase (EC 3.5.2.6)	Klebsiella oxytoca
ARO:3000984	TEM-122	AAQ98890.1	Q6W7J4	blaTEM	Beta-lactamase (EC 3.5.2.6)	Escherichia coli
ARO:3003852	ADC-6	WP_017725267.1	Q6VV61	ampC	Beta-lactamase (EC 3.5.2.6)	Acinetobacter baumannii
ARO:3001813	OXA-55	AAR03105.1	Q6VCW0	blaOXA-55	Beta-lactamase (EC 3.5.2.6)	Shewanella algae
ARO:3000989	TEM-127	AAR89358.1	Q6UK85	---	Beta-lactamase (EC 3.5.2.6)	Escherichia coli
ARO:3000990	TEM-128	AAR89359.1	Q6UK84	---	Beta-lactamase (EC 3.5.2.6)	Escherichia coli
ARO:3000995	TEM-131	AAR10958.1	Q6T5A3	blaTEM-131	Beta-lactamase (EC 3.5.2.6)	Salmonella typhimurium
ARO:3001795	OXA-56	AAR32651.1	Q6SYX6	blaOXA-56	Beta-lactamase (EC 3.5.2.6)	Pseudomonas aeruginosa
ARO:3002547	AAC(6')-Ib-cr	ABC17627.1	Q6SJ71	AAC(6')-Ib	AAC(6')-Ib (AAC(6')-Ib-cr) (AAC(6')-Ib-cr aminoglycoside acetyltransferase) (Aminoglycoside 6'-N-acetyl transferase type Ib-cr) (Aminoglycoside N(6')-acetyltransferase) (Aminoglycoside N-acetyltransferase) (Fluoroquinolone acetylating aminoglycoside acetyltransferase) (Fluoroquinolone acetylating aminoglycoside-(6)-N-acetyltransferase) (Fluoroquinolone-acetylating aminoglycoside 6'-N-acetyltransf…	Escherichia coli
ARO:3002529	AAC(3)-Id	AAR21614.1	Q6SIX1	aac(3)-Id	Aminoglycoside acetyltransferase	Salmonella newport
ARO:3000602	Erm(39)	AAR92235.1	Q6RX35	---	Erm(39)	Mycobacterium fortuitum
ARO:3000996	TEM-132	AAR84298.1	Q6RUK1	blaTEM-132	Beta-lactamase (EC 3.5.2.6)	Klebsiella pneumoniae
ARO:3002334	GES-5	AAR97270.1	Q6RSM8	blaGES-3	Beta-lactamase (EC 3.5.2.6)	Escherichia coli
ARO:3002335	GES-6	AAR97271.1	Q6RSM7	blaGES-4	Beta-lactamase (EC 3.5.2.6)	Klebsiella pneumoniae
ARO:3002134	DHA-3	AAR87489.1	Q6RSD5	---	Beta-lactamase (EC 3.5.2.6)	Klebsiella pneumoniae
ARO:3001812	OXA-54	AAR89917.1	Q6RFZ0	blaOXA-54	Beta-lactamase (EC 3.5.2.6)	Shewanella oneidensis
ARO:3002894	otrC	AAR96051.1	Q6R7P5	otrC	Putative ABC transporter ATP-binding component	Streptomyces rimosus
ARO:3002438	OKP-B-5	CAP12356.2	Q6R5M7	blaOKP-B	Beta-lactamase (EC 3.5.2.6)	Klebsiella pneumoniae
ARO:3002028	CMY-17	AAS13399.1	Q6R5A0	---	Beta-lactamase (EC 3.5.2.6)	Escherichia coli
ARO:3001896	CTX-M-34	AAR99493.1	Q6R3N1	---	Beta-lactamase (EC 3.5.2.6)	Escherichia coli
ARO:3003839	Mrx	AAS13767.1	Q6QWQ6	mrx	Mrx	Aeromonas hydrophila
ARO:3002494	SRT-2	AAS07017.3	Q6QVC3	---	Beta-lactamase (EC 3.5.2.6)	Serratia marcescens
ARO:3002278	VIM-8	AAS13759.1	Q6QUV4	blaVIM-8	VIM-8	Pseudomonas aeruginosa
ARO:3002279	VIM-9	AAS13760.1	Q6QUV3	blaVIM-9	VIM-9	Pseudomonas aeruginosa
ARO:3002280	VIM-10	AAS13761.1	Q6QUV2	blaVIM-10	VIM-10	Pseudomonas aeruginosa
ARO:3000997	TEM-133	AAS19171.1	Q6QR76	---	Beta-lactamase (EC 3.5.2.6)	Klebsiella pneumoniae
ARO:3002372	VEB-3	AAS48620.1	Q6QJ79	blaVEB-3	Beta-lactamase (EC 3.5.2.6)	Enterobacter cloacae
ARO:3000998	TEM-134	AAS79107.1	Q6PW40	blaTEM-134	Beta-lactamase (EC 3.5.2.6)	Citrobacter koseri (Citrobacter diversus)
ARO:3002381	SME-3	AAS92558.1	Q6PRG8	---	Beta-lactamase (EC 3.5.2.6)	Serratia marcescens
ARO:3001773	OXA-61	AAT01092.1	Q6PPZ0	cam1	Class D beta-lactamase (Oxacillinase OXA-61)	Campylobacter jejuni
ARO:3000975	TEM-112	AAS89982.1	Q6PP91	blaTEM-112	Beta-lactamase (EC 3.5.2.6)	Escherichia coli
ARO:3000976	TEM-113	AAS89983.1	Q6PP90	blaTEM-113	Beta-lactamase (EC 3.5.2.6)	Proteus mirabilis
ARO:3000977	TEM-114	AAS89984.1	Q6PP89	blaTEM-114	Beta-lactamase (EC 3.5.2.6)	Enterobacter aerogenes (Aerobacter aerogenes)
ARO:3001110	SHV-53	AAT01223.1	Q6PNM4	---	Beta-lactamase (EC 3.5.2.6) (Fragment)	Klebsiella pneumoniae
ARO:3001796	OXA-50	AAQ76277.1	Q6PL86	poxB	Oxacillin-hydrolyzing class D beta-lactamase OXA-50 (Oxacillinase) (PoxB)	Pseudomonas aeruginosa
ARO:3002641	APH(3')-Ia	CAE51638.1	Q6MXT4	aphA	Aminoglycoside 3'-phosphotransferase	Serratia marcescens
ARO:3000168	tet(D)	CAE51745.1	Q6MXH8	tetD	AraC-family regulatory protein located on Tn10	Serratia marcescens
ARO:3002839	lnuF	CAD91132.1	Q6KEY6	linF	LinF protein	Escherichia coli
ARO:3000993	TEM-129	CAG34105.1	Q6KB04	tem-129	Beta-lactamase (EC 3.5.2.6)	Klebsiella oxytoca
ARO:3002261	IND-5	AAS78754.1	Q6JE29	---	IND-like metallo-beta-lactamase	Chryseobacterium indologenes
ARO:3000988	TEM-126	AAT45742.1	Q6IT48	blaTEM-126	Beta-lactamase (EC 3.5.2.6)	Escherichia coli
ARO:3000972	TEM-109	AAT46413.1	Q6GWS9	blaTEM-109	Beta-lactamase (EC 3.5.2.6)	Escherichia coli
ARO:3000987	TEM-125	AAT46414.1	Q6GWS8	blaTEM-125	Beta-lactamase (EC 3.5.2.6)	Escherichia coli
ARO:3002284	VIM-14	AAT48653.1	Q6GUL7	blaVIM-11	Metallo-beta-lactamase (Metallo-beta-lactamase VIM-14)	Pseudomonas aeruginosa
ARO:3001808	OXA-60	AAQ08905.1	Q6EZ46	bla OXA-60	Beta-lactamase (EC 3.5.2.6)	Ralstonia pickettii (Burkholderia pickettii)
ARO:3000985	TEM-123	AAQ93490.1	Q6EH44	blaTEM-123	Beta-lactamase (EC 3.5.2.6)	Proteus mirabilis
ARO:3000986	TEM-124	AAQ93491.1	Q6EH43	blaTEM-124	Beta-lactamase (EC 3.5.2.6)	Morganella morganii (Proteus morganii)
ARO:3003853	ADC-7	WP_063857816.1	Q6DRA1	---	Beta-lactamase (EC 3.5.2.6)	Acinetobacter baumannii
ARO:3001899	CTX-M-37	AAT70415.1	Q6DQV0	blaCTX-M-37	Beta-lactamase (EC 3.5.2.6)	Enterobacter cloacae
ARO:3001088	SHV-30	AAT75225.1	Q6DLX7	blaSHV-30	Beta-lactamase (EC 3.5.2.6)	Enterobacter cloacae
ARO:3003974	Propionibacterium acnes gyrA conferring resistance to fluoroquinolones	WP_002530866.1	Q6ABQ5	gyrA	DNA gyrase subunit A (EC 5.99.1.3)	Propionibacterium acnes (strain KPA171202 / DSM 16379)
ARO:3003016	dfrA20	CAE53424.1	Q6A328	dfrA20	Dihydrofolate reductase (EC 1.5.1.3)	Pasteurella multocida
ARO:3002620	aadA23	CAH10847.1	Q6A150	aadA23	Streptomycin 3''-adenylyltransferase (EC 2.7.7.47)	Salmonella enterica subsp. enterica serovar Agona
ARO:3003922	oqxA	YP_001693237.1	Q69HW3	oqxA	Membrane-fusion protein OqxA (Multidrug efflux RND transporter periplasmic adaptor subunit OqxA) (Multidrug efflux system protein MdtE) (OqxA membrane-fusion protein) (RND family multidrug efflux permease) (RND family multidrug efflux permease A) (RND multidrug efflux membrane fusion protein) (RND multidrug efflux membrane fusion protein OqxA1)	Escherichia coli
ARO:3003923	oqxB	YP_001693238	Q69HW2	oqxB	Multidrug efflux RND transporter permease subunit (OqxB integral membrane protein) (RND family multidrug efflux permease) (RND family multidrug efflux permease B) (RND family multidrug efflux permease protein)	Escherichia coli
ARO:3002860	dfrA17	ABG91835.1	Q689B1	dfr17	DHFRXVII (Dihydrofolate reductase)	Pseudomonas aeruginosa
ARO:3002314	KPC-4	AAU06362.1	Q66WF8	blaKPC-4	Beta-lactamase (EC 3.5.2.6) (Fragment)	Enterobacter sp. E624
ARO:3001873	CTX-M-10	AAT68658.1	Q66W71	---	Beta-lactamase (EC 3.5.2.6)	Klebsiella pneumoniae
ARO:3002628	aad(6)	AAU10334.1	Q66RP0	aad(6)	Streptomycin aminoglycoside 6-adenyltransferase (Fragment)	Streptococcus oralis
ARO:3002456	LEN-5	AAU25807.1	Q64HI6	blaLEN-5	Beta-lactamase (EC 3.5.2.6)	Klebsiella pneumoniae
ARO:3002817	carA	AAC32027.1	Q60248	carA	Carbomycin resistance protein	Streptomyces thermotolerans
ARO:3003565	r39 beta-lactamase	CAA37699.1	Q60225	---	Beta-lactamase (EC 3.5.2.6)	Actinomadura sp. (strain R39)
ARO:3000594	ErmR	ALX06067.1	Q5Y9H5	ermR	ErmR rRNA adenine N6-methyltransferase (EC 2.1.1.184) (Ribosomal RNA methyltransferase)	Aeromicrobium erythreum
ARO:3001705	OXA-72	ABP87779.2	Q5XQU0	bla-OXA-72	Beta-lactamase OXA-72 (Beta-lactamase oxa72) (BlaOXA-72) (Carbapenem-hydrolyzing beta-lactamase OXA-72) (Carbapenem-hydrolyzing oxacillinase) (Carbapenem-hydrolyzing oxacillinase OXA-72) (Class D beta-lactamase OXA-72) (OXA-40-like beta-lactamase D) (OXA-72) (OXA-72 class D beta-lactamase)	Acinetobacter baumannii
ARO:3002365	PER-3	AAU89132.1	Q5XQD3	blaPER-3	Beta-lactamase (EC 3.5.2.6)	Aeromonas caviae (Aeromonas punctata)
ARO:3002464	LEN-16	AAU89706.1	Q5XPR7	bla-LEN	Beta-lactamase (EC 3.5.2.6)	Klebsiella pneumoniae
ARO:3002029	CMY-18	AAU95778.1	Q5XPQ7	blaCMY-18	Beta-lactamase (EC 3.5.2.6)	Escherichia coli
ARO:3002169	MIR-3	AAU95779.1	Q5XPQ6	blaMIR-3	Beta-lactamase (EC 3.5.2.6)	Enterobacter cloacae
ARO:3001865	CTX-M-2	AAZ95872.1	Q5XLZ4	blaCTX-M-2	Beta-lactamase (EC 3.5.2.6)	Escherichia coli
ARO:3003203	TLA-2	CAG27800.1	Q5W3A6	bla(Tla-2)	Beta-lactamase (EC 3.5.2.6)	uncultured bacterium
ARO:3003019	dfrA23	CAG34233.2	Q5W314	dfrA23	Putative dihydrofolate reductase	Salmonella typhimurium
ARO:3001106	SHV-49	AAS98184.1	Q5VCA8	blaSHV-49	Beta-lactamase (EC 3.5.2.6)	Klebsiella pneumoniae
ARO:3002612	aadA12	ACJ47200.1	Q5UNL3	aadA12	Streptomycin 3''-adenylyltransferase (EC 2.7.7.47)	Escherichia coli
ARO:3003005	CfxA4	AAV37205.1	Q5UAF9	cfxA4	Beta-lactamase (EC 3.5.2.6)	Bacteroides fragilis
ARO:3003096	CfxA5	AAV37206.1	Q5UAF8	cfxA5	Beta-lactamase (EC 3.5.2.6)	Parabacteroides distasonis
ARO:3002209	IMP-18	AEQ73520.1	Q5U807	IMP-18	IMP-18 (Metallo beta-lactamase) (Metallo-beta-lactamase IMP-18)	Pseudomonas aeruginosa
ARO:3001302	chrB	AAS79458.1	Q5SFA3	chrB	Putative resistance determinant	Streptomyces bikiniensis
ARO:3001114	SHV-59	AAV66328.1	Q5S1P8	blaSHV-59	Beta-lactamase (EC 3.5.2.6)	Klebsiella pneumoniae
ARO:3001612	OXA-51	CAC83905.2	Q5QT35	oxa-51	Beta-lactamase (Beta-lactamase OXA-51)	Acinetobacter baumannii
ARO:3000994	TEM-130	CAI29263.1	Q5QQ30	tem-130	Beta-lactamase (EC 3.5.2.6)	Klebsiella pneumoniae
ARO:3001900	CTX-M-38	AAV70602.1	Q5PXN8	blaCTX-M-38	Beta-lactamase (EC 3.5.2.6)	Klebsiella pneumoniae
ARO:3000565	tet(38)	AAV80464.1	Q5PU79	tet38	Tetracycline resistant protein Tet38	Staphylococcus aureus
ARO:3002446	OKP-B-13	AAV80715.1	Q5PU78	blaOKP-b-13	Beta-lactamase (EC 3.5.2.6)	Klebsiella pneumoniae
ARO:3001059	SHV-1	ACR66323.1	Q5PSW7	blaSHV-1	Beta-lactamase (EC 3.5.2.6)	Klebsiella pneumoniae
ARO:3001000	TEM-136	AAV83795.1	Q5PSW6	blaTEM-136	Beta-lactamase (EC 3.5.2.6)	Klebsiella pneumoniae
ARO:3002211	IMP-20	BAD81061.1	Q5NT65	blaIMP-20	Beta-lactamase (EC 3.5.2.6)	Pseudomonas aeruginosa
ARO:3000300	lsaA	AAT46077.1	Q5MQL4	lsa	Lsa (Lsa family ABC-F type ribosomal protection protein)	Enterococcus faecalis (Streptococcus faecalis)
ARO:3000533	macA	AAV85981.1	Q5MK07	macA	MacA	Neisseria gonorrhoeae
ARO:3001909	CTX-M-47	AAV97952.1	Q5MAG2	blaCTX-M	Beta-lactamase (EC 3.5.2.6)	Escherichia coli
ARO:3001910	CTX-M-48	AAV97953.1	Q5MAG1	blaCTX-M	Beta-lactamase (EC 3.5.2.6)	Klebsiella pneumoniae
ARO:3001911	CTX-M-49	AAV97954.1	Q5MAG0	blaCTX-M	Beta-lactamase (EC 3.5.2.6)	Klebsiella pneumoniae
ARO:3001912	CTX-M-50	AAV97955.1	Q5MAF9	blaCTX-M	Beta-lactamase (EC 3.5.2.6)	Klebsiella pneumoniae
ARO:3001908	CTX-M-46	AAV97956.1	Q5MAF8	blaCTX-M	Beta-lactamase (EC 3.5.2.6)	Klebsiella pneumoniae
ARO:3001933	CTX-M-72	AAV97957.1	Q5MAF7	blaCTX-M	Beta-lactamase (EC 3.5.2.6)	Klebsiella pneumoniae
ARO:3001897	CTX-M-35	BAD83775.1	Q5KT51	blaCTX-M-35	Beta-lactamase (EC 3.5.2.6)	Klebsiella oxytoca
ARO:3000569	tet(41)	AAP93922.1	Q5JAK9	tetA(41)	TetA(41)	Serratia marcescens
ARO:3002439	OKP-B-6	CAP12355.2	Q5I6D4	blaOKP-B	Beta-lactamase (EC 3.5.2.6)	Klebsiella pneumoniae
ARO:3001002	TEM-138	AAW47922.1	Q5I5D9	---	Beta-lactamase (EC 3.5.2.6)	Salmonella choleraesuis
ARO:3001619	OXA-71	AAW81342.1	Q5I2N1	bla-OXA-71	Beta-lactamase OXA-51-like protein (Beta-lactamase OXA-71) (Carbapenem-hydrolyzing oxacillinase OXA-71) (OXA-51 family carbapenem-hydrolyzing class D beta-lactamase OXA-71)	Acinetobacter baumannii
ARO:3000883	TEM-11	AAW66604.1	Q5FYS2	bla	Beta-lactamase (EC 3.5.2.6)	Proteus mirabilis
ARO:3002212	IMP-21	BAD89802.1	Q5FAN2	blaIMP-21	Beta-lactamase (EC 3.5.2.6)	Pseudomonas aeruginosa
ARO:3000753	abeM	BAD89844.2	Q5FAM9	abeM	Multidrug efflux pump AbeM (Multidrug transporter MatE)	Acinetobacter baumannii
ARO:3003928	Neisseria gonorrhoeae gyrA conferring resistance to fluoroquinolones	YP_207769.1	Q5F8Y0	gyrA	DNA gyrase subunit A (EC 5.99.1.3)	Neisseria gonorrhoeae (strain ATCC 700825 / FA 1090)
ARO:3003929	Neisseria gonorrhoeae parC conferring resistance to fluoroquinolone	YP_208330.1	Q5F7B9	parC	DNA topoisomerase 4 subunit A (EC 5.99.1.3) (Topoisomerase IV subunit A)	Neisseria gonorrhoeae (strain ATCC 700825 / FA 1090)
ARO:3001924	CTX-M-63	BAD90119.1	Q5DVW7	blaCTX-M-63	Beta-lactamase (EC 3.5.2.6)	Klebsiella pneumoniae
ARO:3002396	OXY-2-1	CAI43414.1	Q5DUK0	blaOXY-2	Beta-lactamase (EC 3.5.2.6)	Klebsiella oxytoca
ARO:3002411	OXY-5-1	CAI43417.1	Q5DUJ7	blaOXY-5	Beta-lactamase (EC 3.5.2.6)	Klebsiella oxytoca
ARO:3002412	OXY-5-2	CAI43419.1	Q5DUJ5	blaOXY-5	Beta-lactamase (EC 3.5.2.6)	Klebsiella oxytoca
ARO:3002413	OXY-6-1	CAI43422.1	Q5DUJ2	blaOXY-6	Beta-lactamase (EC 3.5.2.6)	Klebsiella oxytoca
ARO:3002414	OXY-6-2	CAI43423.1	Q5DUJ1	blaOXY-6	Beta-lactamase (EC 3.5.2.6)	Klebsiella oxytoca
ARO:3002415	OXY-6-3	CAI43424.1	Q5DUJ0	blaOXY-6	Beta-lactamase (EC 3.5.2.6)	Klebsiella oxytoca
ARO:3002416	OXY-6-4	CAI43425.1	Q5DUI8	blaOXY-6	Beta-lactamase (EC 3.5.2.6)	Klebsiella oxytoca
ARO:3002614	aadA14	CAI57696.1	Q5DUB9	aadA14	Streptomycin 3''-adenylyltransferase (EC 2.7.7.47)	Pasteurella multocida
ARO:3002670	cat	AAA26613.1	Q59807	CAT	Chloramphenicol acetyltransferase (EC 2.3.1.28)	Staphylococcus aureus
ARO:3002670	cat	NP_052167.1	Q59805	cat	Chloramphenicol acetyltransferase (EC 2.3.1.28)	Staphylococcus aureus
ARO:3002689	plasmid-encoded cat (pp-cat)	BAA03718.1	Q59655	pp-cat	Chloramphenicol acetyltransferase (EC 2.3.1.28)	Photobacterium damsela subsp. piscicida (Pasteurella piscicida)
ARO:3001409	OXA-14	AAA93528.1	Q59648	OXA-14	Beta-lactamase (EC 3.5.2.6) (Fragment)	Pseudomonas aeruginosa
ARO:3001613	OXA-64	AAW81336.1	Q58XD4	bla-oxa-64	Beta-lactamase (Beta-lactamase OXA-10) (EC 3.5.2.6) (Beta-lactamase OXA-64) (Beta-lactamase oxa30) (Class D beta-lactamase)	Acinetobacter baumannii
ARO:3001614	OXA-65	AAW81337.1	Q58XD3	bla-oxa-65	Beta-lactamase (Beta-lactamase OXA-51-like protein) (Beta-lactamase OXA-65) (Penicillin-binding protein)	Acinetobacter baumannii
ARO:3001616	OXA-68	AAW81339.1	Q58XD1	bla-oxa-68	Beta-lactamase OXA-68 (Class D beta-lactamase)	Acinetobacter baumannii
ARO:3001618	OXA-70	AAW81341.1	Q58XC9	bla-oxa-70	Beta-lactamase OXA-70	Acinetobacter baumannii
ARO:3002634	APH(2'')-Ie	AAX38178.1	Q58M16	---	Aph(2'')-Ie	Enterococcus casseliflavus (Enterococcus flavescens)
ARO:3001622	OXA-77	AAX51233.1	Q58HJ9	bla(OXA-77)	OXA-77	Acinetobacter baumannii
ARO:3001621	OXA-76	AAX51234.1	Q58HJ8	bla(OXA-76)	OXA-76	Acinetobacter baumannii
ARO:3001901	CTX-M-39	AAX54694.1	Q58G80	---	Beta-lactamase (EC 3.5.2.6)	Escherichia coli
ARO:3003558	y56 beta-lactamase	AAX55643.1	Q58G58	blaA	Beta-lactamase (EC 3.5.2.6)	Yersinia enterocolitica
ARO:3000013	vanB	AHH83938.1	Q58F99	vanB	D-alanine--D-alanine ligase (EC 6.3.2.4) (D-Ala-D-Ala ligase) (D-alanylalanine synthetase)	Enterococcus faecium (Streptococcus faecium)
ARO:3003559	cepA beta-lactamase	AAA21532.1	Q57509	cepA	Beta-lactamase (EC 3.5.2.6) (Cephalosporinase)	Bacteroides fragilis
ARO:3002841	vatB	AAA86871.1	Q57156	vat B	VAT B	Staphylococcus aureus
ARO:3000566	tet(39)	AAW66497.1	Q56RY7	tetA(39)	TetA(39)	Acinetobacter sp. LUH5605
ARO:3001004	TEM-141	AAX56615.1	Q56H91	---	Beta-lactamase (EC 3.5.2.6)	Enterobacter cloacae
ARO:3002031	CMY-20	AAX58682.2	Q56G88	---	Beta-lactamase (EC 3.5.2.6)	Escherichia coli
ARO:3003048	rosA	AAC60781.1	Q56877	rosA	RosA	Yersinia enterocolitica (type O:8)
ARO:3003049	rosB	AAC60780.1	Q56876	rosB	RosB	Yersinia enterocolitica (type O:8)
ARO:3000522	ErmG	AAC37034.1	Q56422	---	rRNA methyltransferase	Bacteroides thetaiotaomicron
ARO:3000449	FomB	BAA32494.1	Q56188	fomB	FomB protein	Streptomyces wedmorensis
ARO:3000423	FomA	BAA32493.1	Q56187	fomA	FomA protein	Streptomyces wedmorensis
ARO:3002700	cmlv	AAB36568.1	Q56147	cmlv	Chloramphenicol resistance protein	Streptomyces violaceus (Streptomyces venezuelae)
ARO:3002688	catS	CAA52904.1	Q54803	CATS	Chloramphenicol acetyltransferase gene (Fragment)	Streptococcus pyogenes
ARO:3002382	SME-4	AHA49908.1	Q54488	sme-2	Beta-lactamase (EC 3.5.2.6)	Serratia marcescens
ARO:3001303	ErmO	AAA26779.1	Q54386	lrm	Lincomycin resistance methylase	Streptomyces lividans
ARO:3001305	ErmU	CAA44667.1	Q54385	lmrB	Methyltransferase	Streptomyces lincolnensis
ARO:3003026	fusH	CAA90432.1	Q54345	fusH	Esterase	Streptomyces lividans
ARO:3000250	ErmC	CAA70206.1	Q54285	ermC	Adenine methylase	Staphylococcus hominis
ARO:3000250	ErmC	CAA70207.1	Q54284	ermC	Adenine methylase	Staphylococcus haemolyticus
ARO:3002544	AAC(3)-Xa	BAA78619.1	Q54216	kan	Aminoglycoside 3-N-acetyltransferase	Streptomyces griseus
ARO:3002497	PDC-1	ACQ82807.1	Q541D8	ampC	Beta-lactamase (EC 3.5.2.6)	Pseudomonas aeruginosa
ARO:3002160	FOX-7	CAG28256.1	Q53IN1	fox-7	Beta-lactamase (EC 3.5.2.6)	Klebsiella pneumoniae
ARO:3002205	IMP-14	AAT49068.1	Q53CM4	blaIMP-14	IMP-14 (IMP-14a) (Metallo-beta-lactamase) (Metallo-beta-lactamase IMP-14a)	Pseudomonas aeruginosa
ARO:3002206	IMP-15	AAT49070.1	Q53CM3	blaIMP-15	Beta-lactamase (EC 3.5.2.6)	Pseudomonas aeruginosa
ARO:3003556	SLB-1	AAT90846.1	Q53BU1	bla	Carbapenemase	Shewanella livingstonensis
ARO:3003557	SFB-1	AAT90847.1	Q53BU0	bla	Carbapenemase	Shewanella frigidimarina
ARO:3002893	tcr3	BAA07390.1	Q53769	tcr3	Tcr3 protein	Streptomyces aureofaciens
ARO:3002828	srmB	CAA45050.1	Q53762	srm11c	ABC transporter ATP-binding protein (SrmB)	Streptomyces ambofaciens
ARO:3003748	oleC	AAA26793	Q53716	oleC-ORF4	ATP-binding protein	Streptomyces antibioticus
ARO:3003036	oleB	AAA50325.1	Q53712	oleB	ATP-binding protein	Streptomyces antibioticus
ARO:3002651	APH(3')-Vc	AAB21326.1	Q53558	aphA-5c	Aminoglycoside-O-phosphoryl-transferase Type Vc	Micromonospora chalcea
ARO:3002577	AAC(6')-Ib4	AAL38577.1	Q53289	aacA4	Aminoglycoside 6'-N-acetyltransferase	Acinetobacter baumannii
ARO:3002812	pp-flo	BAA07072.1	Q53019	---	PP-FLO	Photobacterium damsela subsp. piscicida (Pasteurella piscicida)
ARO:3002701	cmr	CAA78046.1	Q52751	---	Chloramphenicol resistance protein	Rhodococcus fascians
ARO:3002656	APH(4)-Ib	CAA52372.1	Q52501	hph	Hygromycin phosphotransferase	Burkholderia pseudomallei (Pseudomonas pseudomallei)
ARO:3000380	FosC	CAA83855.1	Q52470	fosC	Phosphotransferase	Pseudomonas syringae
ARO:3002250	CARB-12	BAA02497.1	Q52152	blaP	Beta-lactamase (EC 3.5.2.6)	Proteus mirabilis
ARO:3002595	AAC(6')-IIb	AAA25680.1	Q51734	aac(6')-IIb	Aminoglycoside 6'-N-acetyltransferase	Pseudomonas fluorescens
ARO:3002182	MOX-1	BAA02563.2	Q51578	blaMOX-1	Beta-lactamase (EC 3.5.2.6)	Klebsiella pneumoniae
ARO:3002645	APH(3')-IIb	CAA62365.1	Q51418	aph(3')IIps	Aminoglycoside phosphotransferase (3')IIps	Pseudomonas aeruginosa
ARO:3002530	AAC(3)-Ib	AAA88422.1	Q51407	aac(3)-Ib	Aminoglycoside 3'-N-acetyltransferase	Pseudomonas aeruginosa
ARO:3002538	AAC(3)-IIIc	AAA25683.1	Q51406	aac(3)-IIIc	Aminoglycoside 3'-N-acetyltransferase	Pseudomonas aeruginosa
ARO:3002537	AAC(3)-IIIb	AAA25682.1	Q51405	aac(3)-IIIb	Aac(3)-IIIb protein	Pseudomonas aeruginosa
ARO:3001408	OXA-13	AAC46344.1	Q51400	bla oxa-13	Beta-lactamase (EC 3.5.2.6)	Pseudomonas aeruginosa
ARO:3002581	AAC(6')-Ib10	AAC46343.1	Q51399	aac(6')-Ib	Aminoglycoside 6'-N-acetyltransferase	Pseudomonas aeruginosa
ARO:3000801	MexD	AAB41957.1	Q51396	mexD	RND family exporter MexD	Pseudomonas aeruginosa
ARO:3000800	MexC	AAB41956.1	Q51395	mexC	Acriflavine resistance protein A (Membrane fusion protein MexC) (Resistance-nodulation-cell division (RND) multidrug efflux membrane fusion protein MexC)	Pseudomonas aeruginosa
ARO:3000812	mtrE	CAA64891.1	Q51006	mtrE	MtrE protein	Neisseria gonorrhoeae
ARO:3001764	OXA-63	AAU88145.1	Q50H31	oxa-63	Class D beta-lactamase	Brachyspira pilosicoli
ARO:3003967	lrfA	AAC43550.1	Q50392	lfrA	Proton antiporter efflux pump	Mycobacterium smegmatis
ARO:3003942	abcA	XP_753111.1	Q4WR59	---	ABC drug exporter AbcA (EC 3.6.3.-)	Neosartorya fumigata (strain ATCC MYA-4609 / Af293 / CBS 101355 / FGSC A1100) (Aspergillus fumigatus)
ARO:3002629	ANT(6)-Ib	AIJ27543.1	Q4VRA5	aadE	AadE (AadE protein)	Campylobacter jejuni
ARO:3001124	SHV-70	AAY42633.1	Q4U457	---	Beta-lactamase (EC 3.5.2.6)	Enterobacter cloacae
ARO:3001903	CTX-M-41	AAY43008.1	Q4TZY8	---	Beta-lactamase (EC 3.5.2.6)	Proteus mirabilis
ARO:3001111	SHV-55	CAI10727.2	Q4TVR4	blaSHV-55	Beta-lactamase (EC 3.5.2.6)	Klebsiella pneumoniae
ARO:3003704	mexM	BAE06005.1	Q4LDT9	mexM	Membrane fusion protein MexM	Pseudomonas aeruginosa
ARO:3003705	mexN	BAE06006.1	Q4LDT8	mexN	RND multidrug efflux transporter MexN	Pseudomonas aeruginosa
ARO:3003698	mexP	BAE06007.1	Q4LDT7	mexP	Efflux pump periplasmic linker BepF (Membrane fusion protein MexP) (Resistance-Nodulation-cell Division (RND) efflux membrane fusion protein)	Pseudomonas aeruginosa
ARO:3003699	mexQ	BAE06008.1	Q4LDT6	mexQ	RND multidrug efflux transporter MexQ	Pseudomonas aeruginosa
ARO:3002027	CMY-16	CAH03679.1	Q4LCT4	blaCMY-16	Beta-lactamase (EC 3.5.2.6)	Proteus mirabilis
ARO:3002837	lnuC	AAY32951.1	Q4KRH2	lnu(C)	LnuC	Streptococcus agalactiae
ARO:3001904	CTX-M-42	AAY84742.1	Q4JNX3	blaCTX-M-42	Beta-lactamase (EC 3.5.2.6)	Escherichia coli
ARO:3001006	TEM-143	AAY85632.1	Q4JL90	blaTEM-143	Beta-lactamase (EC 3.5.2.6)	Escherichia coli
ARO:3002500	PDC-3	ACQ82808.1	Q4H482	ampC	Beta-lactamase (EC 3.5.2.6)	Pseudomonas aeruginosa
ARO:3002868	dfrG	BAE15963.1	Q4H3Y3	dfrG	Dihydrofolate reductase (EC 1.5.1.3)	Staphylococcus aureus
ARO:3001007	TEM-144	CAJ17558.1	Q4GX46	blaTEM	Beta-lactamase (EC 3.5.2.6)	Salmonella derby
ARO:3001905	CTX-M-43	AAZ14955.1	Q4F896	---	Beta-lactamase (EC 3.5.2.6)	Acinetobacter baumannii
ARO:3001012	TEM-145	AAZ14083.2	Q4F7H2	---	Beta-lactamase (EC 3.5.2.6)	Escherichia coli
ARO:3001013	TEM-146	AAZ14084.2	Q4F7H1	---	Beta-lactamase (EC 3.5.2.6)	Escherichia coli
ARO:3003731	fusD	WP_011303797	Q49VA0	---	Putative fibronectin-binding protein	Staphylococcus saprophyticus subsp. saprophyticus (strain ATCC 15305 / DSM 20229)
ARO:3002338	GES-9	AAY43207.1	Q49HG5	bla(GES-9)	Beta-lactamase (EC 3.5.2.6)	Pseudomonas aeruginosa
ARO:3000896	TEM-26	AAC36883.1	Q48488	bla	Beta-lactamase (EC 3.5.2.6) (Fragment)	Klebsiella pneumoniae
ARO:3001857	LAT-1	CAA55007.1	Q48443	blaLAT-1	Beta-lactamase (EC 3.5.2.6)	Klebsiella pneumoniae
ARO:3002155	FOX-1	CAA54602.1	Q48437	fox	Beta-lactamase (EC 3.5.2.6)	Klebsiella pneumoniae
ARO:3002047	CMY-36	ABY58049.1	Q48435	bla LAT-2	Beta-lactamase (EC 3.5.2.6)	Klebsiella pneumoniae
ARO:3002013	CMY-2	CAA62957.1	Q48434	bla CMY-2	Beta-lactamase (EC 3.5.2.6)	Klebsiella pneumoniae
ARO:3001821	ACT-1	AAC45086.2	Q48428	---	Beta-lactamase (EC 3.5.2.6)	Klebsiella pneumoniae
ARO:3003934	tet(U)	AAB08924.1	Q47816	---	ORF1	Enterococcus faecium (Streptococcus faecium)
ARO:3002556	AAC(6')-Ii	AAB63533.1	Q47764	aac(6')-Ii	Aac(6')-Ii protein	Enterococcus faecium (Streptococcus faecium)
ARO:3000316	mphA	BAA03776.1	Q47396	mphA	Macrolide 2'-phosphotransferase (Macrolide 2'-phosphotransferase I) (Macrolide 2'-phosphotransferase I Mph(A)) (Macrolide 2'-phosphotransferase Mph(A)) (Macrolide 2-phosphotransferase) (Macrolide 2-phosphotransferase protein, macrolide resistance protein) (Mph(A)) (Mph(A) family macrolide 2'-phosphotransferase) (Mph(A) macrolide 2'-phosphotransferase I) (Phosphotransferase enzyme family protein)	Escherichia coli
ARO:3002540	AAC(3)-VIa	AAA16194.1	Q47030	aac 3-VI	AAC 3-VI protein	Enterobacter cloacae
ARO:3001858	IMI-1	AAA93461.1	Q46991	imiA	Beta-lactamase (EC 3.5.2.6)	Enterobacter cloacae
ARO:3000898	TEM-28	AAC32891.1	Q46954	---	Beta-lactamase (EC 3.5.2.6)	Escherichia coli
ARO:3001066	SHV-7	AAA87176.1	Q46759	SHV-7	Beta-lactamase (EC 3.5.2.6)	Escherichia coli
ARO:3000596	ErmX	AAG03357.1	Q46484	ermCX	23S rRNA methyltransferase (ErmCX)	Corynebacterium striatum
ARO:3000180	tetA(P)	AAA20116.1	Q46305	tetA(P)	Tetracycline efflux protein (Tetracycline resistance protein)	Clostridium perfringens
ARO:3002709	QnrA3	AAZ04782.1	Q461P1	qnrA3	Quinolone resistance determinant QnrA3	Shewanella algae
ARO:3002710	QnrA4	AAZ04783.1	Q461P0	qnrA4	Quinolone resistance determinant QnrA4	Shewanella algae
ARO:3002711	QnrA5	AAZ04784.1	Q461N9	qnrA5	Quinolone resistance determinant QnrA5	Shewanella algae
ARO:3000593	ErmQ	AAC36915.1	Q46194	ermQ	23S rRNA methlyase	Clostridium perfringens
ARO:3002032	CMY-21	AAZ66866.1	Q45FD4	---	Beta-lactamase (EC 3.5.2.6)	Escherichia coli
ARO:3003836	qacH	AAZ42322.1	Q45EY3	qacH	Quaternary ammonium compound resistance	Vibrio cholerae
ARO:3002897	SAT-4	AAB53445.1	Q45970	sat4	Streptothricine-acetyl-transferase (EC 2.3.1.-)	Campylobacter coli
ARO:3003037	opcM	AAC43969.1	Q45083	opcM	OpcM (Fragment)	Burkholderia cepacia (Pseudomonas cepacia)
ARO:3003553	CepS beta-lactamase	CAA56561.1	Q44260	cepS	Beta-lactamase (EC 3.5.2.6)	Aeromonas sobria
ARO:3002558	AAC(6')-Ik	AAA87229.1	Q44246	aac(6')-Ik	Aminoglycoside N(6')-acetyltransferase type 1 (EC 2.3.1.82) (Aminoglycoside resistance protein)	Acinetobacter sp. CIP-A165
ARO:3001407	OXA-12	AAA83417.1	Q44220	---	Beta-lactamase (EC 3.5.2.6)	Aeromonas sobria
ARO:3003099	cphA2	AAB03413.1	Q44079	cphA2	Beta-lactamase (EC 3.5.2.6)	Aeromonas hydrophila
ARO:3002282	VIM-12	AAZ73123.1	Q3YBY0	blaVIM-12	VIM-12	Klebsiella pneumoniae
ARO:3001703	OXA-86	AAZ78361.1	Q3YA62	bla-OXA-86	OXA-86	Acinetobacter baumannii
ARO:3002712	QnrA6	AAZ78355.1	Q3Y8H2	qnr	QnrA6 (Quinolone resistance protein)	Proteus mirabilis
ARO:3003078	Enterococcus faecium liaR mutant conferring daptomycin resistance	AFK58562.1	Q3XXY6	---	LuxR family response regulator	Enterococcus faecium DO
ARO:3003079	Enterococcus faecium liaS mutant conferring daptomycin resistance	AFK58561.1	Q3XXY5	---	Sensor histidine kinase (EC 2.7.13.3)	Enterococcus faecium DO
ARO:3002856	dfrA24	CAI99385.1	Q3V4E4	dfrA24	Trimethoprim resistant dihydrofolate reductase	Escherichia coli
ARO:3002385	BEL-1	AAZ04368.1	Q3SAW3	bla(BEL1)	Beta-lactamase (EC 3.5.2.6)	Pseudomonas aeruginosa
ARO:3002241	CARB-2	AAZ91704.1	Q3S672	blaP1b	Beta-lactamase (EC 3.5.2.6)	Escherichia coli
ARO:3000361	EreA	AAZ91706.1	Q3S670	ereA	Erythromycin esterase	Escherichia coli
ARO:3001859	IMI-2	ABA00479.1	Q3S3B7	bla(IMI-2)	Beta-lactamase (EC 3.5.2.6)	Enterobacter asburiae
ARO:3001119	SHV-64	ABA06586.1	Q3LUL1	blaSHV-64	Beta-lactamase (EC 3.5.2.6)	Klebsiella pneumoniae
ARO:3001120	SHV-65	ABA06587.1	Q3LUL0	blaSHV-65	Beta-lactamase (EC 3.5.2.6)	Klebsiella pneumoniae
ARO:3001121	SHV-66	ABA06588.1	Q3LUK9	blaSHV-66	Beta-lactamase (EC 3.5.2.6)	Klebsiella pneumoniae
ARO:3001122	SHV-67	ABA06589.1	Q3LUK8	blaSHV-67	Beta-lactamase (EC 3.5.2.6)	Klebsiella pneumoniae
ARO:3001123	SHV-69	ABA06590.1	Q3LUK7	blaSHV-69	Beta-lactamase (EC 3.5.2.6)	Klebsiella pneumoniae
ARO:3000462	mgtA	ABA28305.2	Q3LRZ5	mgt	Macrolide glycosyltransferase	Streptomyces lividans
ARO:3001141	SHV-89	ABA60809.1	Q3HUP1	SHV-89	Beta-lactamase (EC 3.5.2.6)	Klebsiella pneumoniae
ARO:3000866	oleI	ABA42118.2	Q3HTL7	oleI	Oleandomycin glycosyltransferase	Streptomyces antibioticus
ARO:3001913	CTX-M-51	ABA62022.1	Q3HLW4	ctx-m-51	Beta-lactamase (EC 3.5.2.6)	Escherichia coli
ARO:3002959	vanYG1	ABA71729.1	Q3HLP4	vanYG	VanYG	Enterococcus faecalis (Streptococcus faecalis)
ARO:3002965	vanWG	ABA71730.1	Q3HLP3	vanWG	VanWG	Enterococcus faecalis (Streptococcus faecalis)
ARO:3002030	CMY-19	BAE48233.1	Q33DY3	blaCMY-19	Class C beta-lactamase	Klebsiella pneumoniae
ARO:3001914	CTX-M-52	ABB17185.1	Q30B66	blaCTX-M-52	Beta-lactamase (EC 3.5.2.6)	Klebsiella pneumoniae
ARO:3002539	AAC(3)-IV	ABB43029.1	Q306W4	aacC4	AAC(3) family aminoglycoside 3-N-acetyltransferase (Aminoglycoside N-acetyltransferase AAC(3)-IV) (Aminoglycoside acetyltransferase) (Truncated aminoglycoside-(3)-acetyltransferase IV)	Escherichia coli
ARO:3002420	OKP-A-3	CAJ19599.1	Q2YHZ5	blaOKP-A	Beta-lactamase (EC 3.5.2.6)	Klebsiella pneumoniae
ARO:3002421	OKP-A-4	CAJ19601.1	Q2YHZ4	blaOKP-A	Beta-lactamase (EC 3.5.2.6)	Klebsiella pneumoniae
ARO:3002422	OKP-A-5	CAJ19602.1	Q2YHZ3	blaOKP-A	Beta-lactamase (EC 3.5.2.6)	Klebsiella pneumoniae
ARO:3002423	OKP-A-6	CAJ19603.1	Q2YHZ2	blaOKP-A	Beta-lactamase (EC 3.5.2.6)	Klebsiella pneumoniae
ARO:3002424	OKP-A-7	CAJ19605.1	Q2YHZ0	blaOKP-A	Beta-lactamase (EC 3.5.2.6)	Klebsiella pneumoniae
ARO:3002425	OKP-A-8	CAJ19606.1	Q2YHY9	blaOKP-A	Beta-lactamase (EC 3.5.2.6)	Klebsiella pneumoniae
ARO:3002426	OKP-A-9	CAJ19607.1	Q2YHY8	blaOKP-A	Beta-lactamase (EC 3.5.2.6)	Klebsiella pneumoniae
ARO:3002427	OKP-A-10	CAJ19608.1	Q2YHY7	blaOKP-A	Beta-lactamase (EC 3.5.2.6)	Klebsiella pneumoniae
ARO:3002435	OKP-B-2	CAJ19610.1	Q2YHY6	blaOKP-B	Beta-lactamase (EC 3.5.2.6)	Klebsiella pneumoniae
ARO:3002436	OKP-B-3	CAJ19611.1	Q2YHY5	blaOKP-B	Beta-lactamase (EC 3.5.2.6)	Klebsiella pneumoniae
ARO:3002437	OKP-B-4	CAJ19612.1	Q2YHY3	blaOKP-B	Beta-lactamase (EC 3.5.2.6)	Klebsiella pneumoniae
ARO:3002440	OKP-B-7	CAJ19615.1	Q2YHY1	blaOKP-B	Beta-lactamase (EC 3.5.2.6)	Klebsiella pneumoniae
ARO:3002441	OKP-B-8	CAJ19616.1	Q2YHX9	blaOKP-B	Beta-lactamase (EC 3.5.2.6)	Klebsiella pneumoniae
ARO:3002442	OKP-B-9	CAJ19618.1	Q2YHX8	blaOKP-B	Beta-lactamase (EC 3.5.2.6)	Klebsiella pneumoniae
ARO:3002443	OKP-B-10	CAJ19619.1	Q2YHX7	blaOKP-B	Beta-lactamase (EC 3.5.2.6)	Klebsiella pneumoniae
ARO:3002444	OKP-B-11	CAJ19620.1	Q2YHX6	blaOKP-B	Beta-lactamase (EC 3.5.2.6)	Klebsiella pneumoniae
ARO:3002033	CMY-22	ABB72431.1	Q2XT36	blaCMY-22	Beta-lactamase (EC 3.5.2.6)	Escherichia coli
ARO:3001943	CTX-M-82	ABB59946.1	Q2XT31	blaCTX-M-82	Beta-lactamase (EC 3.5.2.6)	Escherichia coli
ARO:3003020	dfrA25	ABB71176.1	Q2XQ06	dfrA25	Dihydrofolate reductase	Salmonella enterica subsp. enterica serovar Agona
ARO:3001915	CTX-M-53	ABB72225.1	Q2XPY6	blaCTX-M-53	Beta-lactamase (EC 3.5.2.6)	Salmonella enterica subsp. enterica serovar Westhampton
ARO:3001115	SHV-60	BAF92780.1	Q2WEB9	blaSHV-60	Beta-lactamase (EC 3.5.2.6)	Klebsiella pneumoniae
ARO:3001116	SHV-61	CAI30650.2	Q2WEB8	blaSHV-61	Beta-lactamase (EC 3.5.2.6)	Klebsiella pneumoniae
ARO:3001117	SHV-62	CAI30651.2	Q2WEB7	blaSHV-62	Beta-lactamase (EC 3.5.2.6)	Klebsiella pneumoniae
ARO:3001014	TEM-147	ABB84515.1	Q2V9Y4	---	Beta-lactamase (EC 3.5.2.6)	Pseudomonas aeruginosa
ARO:3000924	TEM-55	ABB97007.1	Q2V899	---	Beta-lactamase (EC 3.5.2.6)	Escherichia coli
ARO:3001916	CTX-M-54	ABC18328.3	Q2PT38	blaCTX-M-54	Beta-lactamase (EC 3.5.2.6)	Klebsiella pneumoniae
ARO:3002719	QnrB5	ABC17628.1	Q2PT29	qnrB5	QnrB5	Salmonella berta
ARO:3002716	QnrB3	ABC17629.1	Q2PT28	qnrB3	QnrB3	Escherichia coli
ARO:3001624	OXA-84	ABC26006.1	Q2PQA8	bla-OXA-84	Beta-lactamase OXA-84	Acinetobacter baumannii
ARO:3001623	OXA-83	ABC26007.1	Q2PQA7	bla-OXA-83	Beta-lactamase OXA-83	Acinetobacter baumannii
ARO:3001139	SHV-85	ABC54571.1	Q2MJV7	---	Beta-lactamase (EC 3.5.2.6)	Klebsiella pneumoniae
ARO:3001140	SHV-86	ABC58727.1	Q2MJC2	blaSHV-86	Beta-lactamase (EC 3.5.2.6)	Klebsiella pneumoniae
ARO:3001632	OXA-92	ABC61637.1	Q2LD08	---	BlaOXA-92	Acinetobacter baumannii
ARO:3002835	lnuA	CAL44992.1	Q2KTD3	lnuA	Lincosamide nucleotidyltransferase	Staphylococcus chromogenes (Staphylococcus hyicus subsp. chromogenes)
ARO:3001704	OXA-87	ABC84263.1	Q2I2J1	---	OXA-87	Acinetobacter baumannii
ARO:3002714	QnrB1	ABC86904.1	Q2I1Y8	qnrB1	QnrB1	Klebsiella pneumoniae
ARO:3002283	VIM-13	ABC94518.1	Q2HY42	blaVIM-13	Class B carbapenemase VIM-13 (Metallo-beta-lactamase VIM-13) (VIM-13)	Pseudomonas aeruginosa
ARO:3003917	antibiotic resistant menA	YP_499533.1	Q2FZM0	menA	1,4-dihydroxy-2-naphthoate octaprenyltransferase (DHNA-octaprenyltransferase) (EC 2.5.1.74)	Staphylococcus aureus (strain NCTC 8325)
ARO:3003074	Staphylococcus aureus cls conferring resistance to daptomycin	YP_500802.1	Q2FWG8	---	Cardiolipin synthase (CL synthase) (EC 2.7.8.-)	Staphylococcus aureus (strain NCTC 8325)
ARO:3000553	adeR	ADM92605.1	Q2FD68	adeR	AdeR (DNA-binding response regulator) (Efflux system DNA-binding response regulator AdeR) (Two-component response regulator)	Acinetobacter baumannii
ARO:3002622	aadA6/aadA10	CAJ32491.1	Q2A799	aadA10	Streptomycin 3''-adenylyltransferase (EC 2.7.7.47)	Pseudomonas aeruginosa
ARO:3001626	OXA-88	ABD48715.1	Q27K43	blaOXA-88	Beta-lactamase OXA-88	Acinetobacter baumannii
ARO:3002615	aadA15	ABD58917.1	Q27JL8	aadA15	Streptomycin 3''-adenylyltransferase (EC 2.7.7.47)	Pseudomonas aeruginosa
ARO:3003726	vanSI	WP_011461302.1	Q24R65	---	Uncharacterized protein	Desulfitobacterium hafniense (strain Y51)
ARO:3003728	vanRI	WP_011461303	Q24R64	---	Uncharacterized protein	Desulfitobacterium hafniense (strain Y51)
ARO:3003727	vanKI	WP_011461306	Q24R61	---	Uncharacterized protein	Desulfitobacterium hafniense (strain Y51)
ARO:3000781	adeJ	AAX14802.1	Q24LT7	adeJ	AdeJ	Acinetobacter baumannii
ARO:3000782	adeK	AAX14803.1	Q24LT6	adeK	AdeC/adeK/oprM family multidrug efflux complex outer membrane factor (AdeK) (Adenine deaminase) (Adenosine deaminase) (Efflux transporter, outer membrane factor (OMF) lipo, NodT family protein) (Multidrug efflux protein AdeK) (Outer membrane protein OprM) (RND efflux system, outer membrane lipoprotein CmeC)	Acinetobacter baumannii
ARO:3001920	CTX-M-59	ABD73290.1	Q206M3	CTX-M	Beta-lactamase (EC 3.5.2.6)	Klebsiella pneumoniae
ARO:3001071	SHV-12	CAI76927.1	Q1XFL2	blaSHV-12	Beta-lactamase (EC 3.5.2.6) (Fragment)	Escherichia coli
ARO:3001792	OXA-62	AAR32134.1	Q1RNF9	bla-OXA-62	Class D beta-lactamase OXA-62	Pandoraea pnomenusa
ARO:3001625	OXA-89	ABE03012.1	Q1PG78	bla-OXA-89	Oxacillinase OXA-89	Acinetobacter baumannii
ARO:3001016	TEM-149	ABC96711.1	Q1KY81	blaTEM-149	Beta-lactamase (EC 3.5.2.6)	Enterobacter aerogenes (Aerobacter aerogenes)
ARO:3002034	CMY-23	ABF06441.1	Q1KP03	blaCMY-23	Beta-lactamase (EC 3.5.2.6)	Salmonella senftenberg
ARO:3003969	lmrP	ABF33001.1	Q1JJH2	lmrP	Multidrug resistance protein	Streptococcus pyogenes serotype M12 (strain MGAS9429)
ARO:3002521	OCH-8	ABF50909.1	Q1HG84	ampC	Beta-lactamase (EC 3.5.2.6)	Ochrobactrum anthropi
ARO:3001437	OXA-67	ABF50983.1	Q1HFN1	blaOXA-67	Beta-lactamase OXA-67	Acinetobacter baumannii
ARO:3001627	OXA-91	ABF47914.1	Q1HBG7	blaOXA-91	Beta-lactamase OXA-91	Acinetobacter baumannii
ARO:3001628	OXA-93	ABF47916.1	Q1HBG6	blaOXA-93	Beta-lactamase OXA-93	Acinetobacter baumannii
ARO:3001629	OXA-94	ABF47917.1	Q1HBG5	blaOXA-94	Beta-lactamase OXA-94	Acinetobacter baumannii
ARO:3001630	OXA-95	ABF47918.1	Q1HBG4	blaOXA-95	Beta-lactamase OXA-95	Acinetobacter baumannii
ARO:3001631	OXA-96	ABF47919.1	Q1HBG3	blaOXA-96	Beta-lactamase (EC 3.5.2.6)	Acinetobacter baumannii
ARO:3000319	mphC	CAJ51085.1	Q1EMC9	mphC	Macrolide 2'-phosphotransferase	Staphylococcus equorum
ARO:3002213	IMP-22	ABC88434.1	Q1A2Z1	blaIMP-22	Beta-lactamase (EC 3.5.2.6)	Pseudomonas fluorescens
ARO:3002791	QnrS2	ABF47470.1	Q19RW0	qnrS2	QnrS2	Salmonella anatum
ARO:3002221	IMP-30	ABF70513.1	Q19KT1	blaIMP-1-like	Beta-lactamase (EC 3.5.2.6)	Pseudomonas aeruginosa
ARO:3003995	Clostridium difficile gyrA conferring resistance to fluoroquinolones	YP_001086469.1	Q18C90	gyrA	DNA gyrase subunit A (EC 5.99.1.3)	Peptoclostridium difficile (strain 630) (Clostridium difficile)
ARO:3000186	tetM	CAJ67339.1	Q188V1	tetM	Tetracycline resistance protein Tn5397	Peptoclostridium difficile (strain 630) (Clostridium difficile)
ARO:3002879	linG	YP_724467.1	Q17U47	linF	LinF (Lincosamide nucleotidyltransferase)	Escherichia coli
ARO:3003109	msrE	YP_724476.1	Q17U38	mel	Macrolide efflux protein (Macrolide efflux pump protein Mel) (Msr family ABC-F type ribosomal protection protein) (Probable macrolide efflux protein) (Putative ABC transporter ATP-binding protein YheS)	Escherichia coli
ARO:3001785	OXA-73	AAW22056.1	Q17ST5	blaOXA-73	Beta-lactamase OXA-73	Klebsiella pneumoniae
ARO:3000392	Erm(37)	CCP44758.1	Q10838	erm(37)	Probable 23S rRNA methyltransferase Erm(37)	Mycobacterium tuberculosis (strain ATCC 25618 / H37Rv)
ARO:3002640	APH(3'')-Ic	ABC68330.1	Q0ZNJ3	aph(3'')-Ic	APH(3'')-Ic	Mycobacterium fortuitum
ARO:3002609	aadA9	ABG49324.1	Q0ZKF0	---	Uncharacterized protein	Corynebacterium sp. L2-79-05
ARO:3002724	QnrB10	ABG56269.1	Q0ZBS7	qnrB10	QnrB10	Citrobacter freundii
ARO:3002585	AAC(6')-31	CAK55557.1	Q0VTT5	aac(6')-31	6'-N-aminoglycoside acetyltransferase	Pseudomonas putida (Arthrobacter siderocapsulatus)
ARO:3002585	AAC(6')-31	CAK55563.1	Q0VTS9	aac(6')-31	6'-N-aminoglycoside acetyltransferase (AAC(6')-31)	Acinetobacter baumannii
ARO:3003867	ADC-23	WP_063857797.1	Q0VTS5	adc-23	Beta-lactamase (EC 3.5.2.6)	Acinetobacter pittii (Acinetobacter genomosp. 3)
ARO:3003866	ADC-22	WP_063857796.1	Q0VTS4	adc-22	Beta-lactamase (EC 3.5.2.6)	Acinetobacter pittii (Acinetobacter genomosp. 3)
ARO:3003865	ADC-21	WP_063857795.1	Q0VTS3	adc-21	Beta-lactamase (EC 3.5.2.6)	Acinetobacter pittii (Acinetobacter genomosp. 3)
ARO:3003864	ADC-20	WP_063857794.1	Q0VTS2	adc-20	Beta-lactamase (EC 3.5.2.6)	Acinetobacter pittii (Acinetobacter genomosp. 3)
ARO:3003863	ADC-19	WP_063857793.1	Q0VTS1	adc-19	Beta-lactamase (EC 3.5.2.6)	Acinetobacter pittii (Acinetobacter genomosp. 3)
ARO:3003861	ADC-17	WP_063857792.1	Q0VTR9	adc-17	Beta-lactamase (EC 3.5.2.6)	Acinetobacter pittii (Acinetobacter genomosp. 3)
ARO:3003860	ADC-16	WP_063857791.1	Q0VTR8	adc-16	Beta-lactamase (EC 3.5.2.6)	Acinetobacter pittii (Acinetobacter genomosp. 3)
ARO:3003859	ADC-15	WP_063857790.1	Q0VTR7	adc-15	Beta-lactamase (EC 3.5.2.6)	Acinetobacter pittii (Acinetobacter genomosp. 3)
ARO:3003858	ADC-14	WP_063857789.1	Q0VTR6	adc-14	Beta-lactamase (EC 3.5.2.6)	Acinetobacter pittii (Acinetobacter genomosp. 3)
ARO:3003857	ADC-13	WP_063857788.1	Q0VTR5	adc-13	Beta-lactamase (EC 3.5.2.6)	Acinetobacter pittii (Acinetobacter genomosp. 3)
ARO:3003856	ADC-12	WP_063857787.1	Q0VTR4	adc-12	Beta-lactamase (EC 3.5.2.6)	Acinetobacter pittii (Acinetobacter genomosp. 3)
ARO:3001001	TEM-137	CAL08007.1	Q0VTQ9	blaTEM-137	Beta-lactamase (EC 3.5.2.6)	Shigella sonnei
ARO:3003854	ADC-8	CAL25116.3	Q0VJU2	adc-8	Beta-lactamase (EC 3.5.2.6)	Acinetobacter baylyi
ARO:3002705	floR	CAL30184.1	Q0VJ73	floR	Florfenicol/Chloramphenicol efflux protein	Bordetella bronchiseptica (Alcaligenes bronchisepticus)
ARO:3002699	cmlB1	CAL30186.1	Q0VJ71	cmlB1	Chloramphenicol efflux protein	Bordetella bronchiseptica (Alcaligenes bronchisepticus)
ARO:3002861	dfrA5	ABB89122.1	Q0QMM1	dfrA5	DfrA5	Salmonella enteritidis
ARO:3002533	AAC(3)-IIa	YP_007349693.1	Q0QC65	aacC3	AAC(3')-II (AacC2 aminoglycoside acetyltransferase) (Aminoglycoside 3-N-acetyltransferase) (Aminoglycoside N(3')-acetyltransferase III,belongs to the antibiotic N-acetyltransferase family) (Aminoglycoside N-acetyltransferase AAC(3)-IId) (Aminoglycoside acetyltransferase) (EC 2.3.1.-)	Klebsiella pneumoniae
ARO:3002790	QnrS1	ABG56870.1	Q0QC57	qnrS1	Fluoroquinolone resistance protein (Plasmid-mediated quinolone resistance protein) (QnrS quinolone resistance protein) (QnrS1) (QnrS1 quinolone resistance protein) (Quinolone resistance protein) (Quinolone resistance protein QnrS1) (Quinolone-resistant protein S1)	Klebsiella pneumoniae
ARO:3002621	aadA24	ABG72894.1	Q0PWM6	aadA24	Streptomycin 3''-adenylyltransferase (EC 2.7.7.47)	Salmonella newport
ARO:3001144	SHV-92	ABH04327.1	Q0PGR7	blaSHV-92	Beta-lactamase (EC 3.5.2.6)	Klebsiella pneumoniae
ARO:3000526	cmeR	YP_002343805.1	Q0PBE2	cmeR	Transcriptional regulator CmeR	Campylobacter jejuni subsp. jejuni serotype O:2 (strain ATCC 700819 / NCTC 11168)
ARO:3001822	ACT-2	CAJ28994.1	Q0KHB3	blaACT-2	Beta-lactamase (EC 3.5.2.6)	Enterobacter asburiae
ARO:3002881	lmrC	ABF66011.1	Q0GUI3	lmrC	Multidrug transporter (Fragment)	Lactococcus lactis subsp. lactis (Streptococcus lactis)
ARO:3002882	lmrD	ABF66027.1	Q0GUG7	lmrD	Multidrug transporter (Fragment)	Lactococcus lactis subsp. lactis (Streptococcus lactis)
ARO:3001917	CTX-M-55	ABI34705.1	Q0GA57	blaCTX-M-55	Beta-lactamase (EC 3.5.2.6)	Escherichia coli
ARO:3001019	TEM-152	ABI74447.1	Q09Q13	---	Beta-lactamase (EC 3.5.2.6)	Escherichia coli
ARO:3001018	TEM-151	ABI74448.1	Q09Q12	---	Beta-lactamase (EC 3.5.2.6)	Escherichia coli
ARO:3001649	OXA-99	ABI53716.1	Q09IX8	blaOXA-99	Beta-lactamase OXA-99	Acinetobacter baumannii
ARO:3002262	IND-6	CAJ32373.2	Q08I33	blaIND-6	Metallo-beta-lactamase IND-6 (EC 3.5.2.6)	Chryseobacterium indologenes
ARO:3002619	aadA22	CAK12750.1	Q08GN0	aadA22	Streptomycin 3''-adenylyltransferase (EC 2.7.7.47)	Salmonella typhimurium
ARO:3001023	TEM-157	ABI81768.1	Q06DP4	---	Beta-lactamase (EC 3.5.2.6)	Enterobacter cloacae
ARO:3002857	dfrA26	CAL48457.1	Q05GI2	dfrA26	Dihydrofolate reductase (EC 1.5.1.3)	Escherichia coli
ARO:3002624	ANT(4')-IIa	AAA25717.1	Q04455	ant(4')-IIa	Aminoglycoside-4'-adenyltransferase	Pseudomonas aeruginosa
ARO:3002553	AAC(6')-If	CAA39038.1	Q03635	aacA	Aminoglycoside N(6')-acetyltransferase type 1 (EC 2.3.1.82) (Aminoglycoside resistance protein)	Enterobacter cloacae
ARO:3002535	AAC(3)-IIc	CAA38525.1	Q03634	aacC2 gene	Amionglycoside-(3)-N-acetyltransferase	Escherichia coli
ARO:3003686	Pseudomonas aeruginosa oprD with mutation conferring resistance to imipenem	NP_249649.1	P32722	oprD	Porin D (EC 3.4.21.-) (Imipenem/basic amino acid-specific outer membrane pore) (Outer membrane protein D2)	Pseudomonas aeruginosa (strain ATCC 15692 / DSM 22644 / CIP 104116 / JCM 14847 / LMG 12228 / 1C / PRS 101 / PAO1)
ARO:3003394	Mycobacterium tuberculosis pncA mutations conferring resistance to pyrazinamide	CCP44816.1	I6XD65	pncA	Nicotinamidase/pyrazinamidase (Nicotinamidase) (EC 3.5.1.19) (Nicotinamide deamidase) (NAMase) (Pyrazinamidase) (PZAase) (EC 3.5.1.-)	Mycobacterium tuberculosis (strain ATCC 25618 / H37Rv)
ARO:3000822	pmrA	NP_358469.1	P0A4K5	pmrA	Multi-drug resistance efflux pump PmrA	Streptococcus pneumoniae (strain ATCC BAA-255 / R6)
ARO:3004077	PmpM	NP_250052.1	Q9I3Y3	pmpM	Multidrug resistance protein PmpM (H(+)/drug antiporter) (Multidrug-efflux transporter)	Pseudomonas aeruginosa (strain ATCC 15692 / DSM 22644 / CIP 104116 / JCM 14847 / LMG 12228 / 1C / PRS 101 / PAO1)
ARO:3003042	Streptococcus pneumoniae PBP2b conferring resistance to amoxicillin	NP_359110.1	P0A3M6	penA	Penicillin-binding protein 2B	Streptococcus pneumoniae (strain ATCC BAA-255 / R6)
ARO:3003937	Neisseria meningititis PBP2 conferring resistance to beta-lactam	NP_273462.1	P0A0U9	penA	Probable peptidoglycan D,D-transpeptidase PenA (EC 3.4.16.4) (Penicillin-binding protein 2) (PBP-2)	Neisseria meningitidis serogroup B (strain MC58)
ARO:3000024	patA	NP_417544.5	P42588	patA	Putrescine aminotransferase (EC 2.6.1.82) (Putrescine--2-oxoglutaric acid transaminase) (PAT) (PATase)	Escherichia coli (strain K12)
ARO:3003314	Staphylococcus aureus parE conferring resistance to aminocoumarin	BAA11086.1	Q2FYS5	parE	DNA topoisomerase 4 subunit B (EC 5.99.1.3) (Topoisomerase IV subunit B)	Staphylococcus aureus (strain NCTC 8325)
ARO:3003317	Salmonella serovars parE conferring resistance to fluoroquinolones	NP_462096.1	P0A2I5	parE	DNA topoisomerase 4 subunit B (EC 5.99.1.3) (Topoisomerase IV subunit B)	Salmonella typhimurium (strain LT2 / SGSC1412 / ATCC 700720)
ARO:3003685	Pseudomonas aeruginosa parE conferring resistance to fluoroquinolones	NP_253654.1	Q9HUJ8	parE	DNA topoisomerase 4 subunit B (EC 5.99.1.3) (Topoisomerase IV subunit B)	Pseudomonas aeruginosa (strain ATCC 15692 / DSM 22644 / CIP 104116 / JCM 14847 / LMG 12228 / 1C / PRS 101 / PAO1)
ARO:3003311	Streptococcus pneumoniae parC conferring resistance to fluoroquinolone	AAK74984.1	P72525	parC	DNA topoisomerase 4 subunit A (EC 5.99.1.3) (Topoisomerase IV subunit A)	Streptococcus pneumoniae serotype 4 (strain ATCC BAA-334 / TIGR4)
ARO:3003941	Shigella flexneri parC conferring resistance to fluoroquinolones	NP_708834.1	P0AFI4	parC	DNA topoisomerase 4 subunit A (EC 5.99.1.3) (Topoisomerase IV subunit A)	Shigella flexneri
ARO:3003939	Salmonella enterica parC conferring resistance to fluoroquinolones	NP_462089.1	P26973	parC	DNA topoisomerase 4 subunit A (EC 5.99.1.3) (Topoisomerase IV subunit A)	Salmonella typhimurium (strain LT2 / SGSC1412 / ATCC 700720)
ARO:3003308	Escherichia coli parC conferring resistance to fluoroquinolone	AAC76055.1	P0AFI2	parC	DNA topoisomerase 4 subunit A (EC 5.99.1.3) (Topoisomerase IV subunit A)	Escherichia coli (strain K12)
ARO:3000592	ErmN	CAA66307.1	P97178	tlrD	23S rRNA methyltransferase	Streptomyces fradiae
ARO:3002636	APH(2'')-IIIa	AAB49832.1	P96762	---	Gentamicin resistance protein	Enterococcus gallinarum
ARO:3000250	ErmC	AAC45552.1	P95728	---	rRNA N-6-methyltransferase	Staphylococcus chromogenes (Staphylococcus hyicus subsp. chromogenes)
ARO:3001068	SHV-9	AAB37395.2	P95675	shv-5a	Beta-lactamase (EC 3.5.2.6)	Klebsiella pneumoniae
ARO:3002884	iri	AAB41059.1	P95598	iri	Rifampin monooxygenase	Rhodococcus hoagii (Corynebacterium equii)
ARO:3000464	Neisseria gonorrhoeae mutant porin PIB (por) with reduced permeability to antibiotic	AAB57788.1	P95351	por	Outer membrane protein PIB	Neisseria gonorrhoeae
ARO:3003461	Mycobacterium tuberculosis ndh mutant conferring resistance to isoniazid	CCP44620.1	P95160	ndh	Probable NADH dehydrogenase Ndh	Mycobacterium tuberculosis (strain ATCC 25618 / H37Rv)
ARO:3003060	tsnr	CCP44409.1	P94978	tsnR	Possible 23S rRNA methyltransferase TsnR	Mycobacterium tuberculosis (strain ATCC 25618 / H37Rv)
ARO:3002671	cat-TC	AAB53259.1	P94902	cat-TC	Chloramphenicol acetyltransferase (EC 2.3.1.28)	Lactobacillus reuteri
ARO:3002157	FOX-3	CAA71947.1	P94856	bla FOX-3	Beta-lactamase (EC 3.5.2.6)	Klebsiella oxytoca
ARO:3002559	AAC(6')-Ip	CAA91010.1	P94629	aac(6')-Il	Aminoglycoside acetyltransferase(6') type I	Citrobacter freundii
ARO:3001416	OXA-21	CAA71699.2	P94124	blaOXA-21	Beta-lactamase (EC 3.5.2.6)	Acinetobacter baumannii
ARO:3000914	TEM-45	CAA64682.1	P78144	blaIRT-14	Beta-lactamase (EC 3.5.2.6)	Escherichia coli
ARO:3002364	PER-2	CAA63714.1	P74842	bla(per-2)	Beta-lactamase (EC 3.5.2.6)	Salmonella typhimurium
ARO:3002663	APH(9)-Ib	AAB66655.1	P72441	spcN	SpcN	Streptomyces netropsis (Streptoverticillium netropsis)
ARO:3002012	CMY-1	CAA63264.1	P71420	bla(CMY-1)	Beta-lactamase (EC 3.5.2.6)	Klebsiella pneumoniae
ARO:3002891	otr(A)	CAA37477.1	Q55002	otrA	Oxytetracycline resistance protein	Streptomyces rimosus
ARO:3000379	OprM	NP_249118.1	Q51487	oprM	Outer membrane protein OprM	Pseudomonas aeruginosa (strain ATCC 15692 / DSM 22644 / CIP 104116 / JCM 14847 / LMG 12228 / 1C / PRS 101 / PAO1)
ARO:3000802	OprJ	AAB41958.1	Q51397	oprJ	Outer membrane protein OprJ	Pseudomonas aeruginosa (strain ATCC 15692 / DSM 22644 / CIP 104116 / JCM 14847 / LMG 12228 / 1C / PRS 101 / PAO1)
ARO:3000182	tet(Y)	AAC72341.1	O88172	tetA(Y)	Tetracycline resistance protein	IncQ plasmid pIE1120
ARO:3002847	arr-2	AAC64366.1	O87490	arr-2	ARR-2 (Arr2) (Ribosylating transferase ARR-2) (Rifampin ADP-ribosylating transferase)	Pseudomonas aeruginosa
ARO:3002842	vatC	AAC61671.1	O87276	vatC	Streptogramin A acetyl transferase	Staphylococcus cohnii
ARO:3001308	VgbB	AAC61670.1	O87275	vgbB	Streptogramin B lactonase	Staphylococcus cohnii
ARO:3000463	gimA	CAA11707.1	O86304	mgtA	Macrolide glycosyl transferase	Streptomyces ambofaciens
ARO:3001303	ErmO	CAA11706.1	O86303	srmA	Mono-methyl transferase (EC 2.1.1.48)	Streptomyces ambofaciens
ARO:3002660	APH(6)-Id	AAC23556.1	O84956	strB	Streptomycin resistance protein B	Pseudomonas aeruginosa
ARO:3002603	aadA3	AAC14728.1	O70042	aadA3	Aminoglycoside 3''-O-nucleotidyltransferase	Plasmid NR79
ARO:3002892	otr(B)	AAD04032.1	O69070	otrB	Tetracycline efflux protein	Streptomyces rimosus
ARO:3001412	OXA-17	AAC15074.1	O69009	---	Beta-lactamase (EC 3.5.2.6) (Fragment)	Pseudomonas aeruginosa
ARO:3001297	oleR	AAC12650.1	O68843	oleR	Glycosidase OleR	Streptomyces antibioticus
ARO:3002560	AAC(6')-Iq	AAC25500.1	O68484	aac(6')-Iq	Aminoglycoside 6'-N-acetyltransferase	Klebsiella pneumoniae
ARO:3000929	TEM-60	AAC05975.1	O68473	bla TEM-60	Beta-lactamase (EC 3.5.2.6)	Providencia stuartii
ARO:3002637	APH(2'')-IVa	AAC14693.1	O68183	aph(2'')-Id	APH(2'')-Id	Enterococcus casseliflavus (Enterococcus flavescens)
ARO:3002846	arr-1	AAC05822.1	O67972	arr	Rifampin ADP-ribosyl transferase	Mycobacterium smegmatis
ARO:3000118	vgaB	AAB95639.1	O54396	vgaB	Pristinamycin resistance protein VgaB	Staphylococcus aureus
ARO:3000250	ErmC	CAA70208.1	O54232	ermC	Adenine methylase (ErmC)	Staphylococcus hyicus
ARO:3002132	DHA-1	CAA76196.1	O54216	AmpC bla MOR-1 (DHA-1)	Beta-lactamase (EC 3.5.2.6)	Salmonella enteritidis
ARO:3002023	CMY-12	CAA76382.1	O54038	bla CMY-12	Beta-lactamase (EC 3.5.2.6) (Fragment)	Proteus mirabilis
ARO:3000917	TEM-48	CAA71323.1	O53043	bla TEM-48	Beta-lactamase (EC 3.5.2.6)	Klebsiella pneumoniae
ARO:3002156	FOX-2	CAA71325.1	O52988	bla-FOX-2	Beta-lactamase (EC 3.5.2.6)	Escherichia coli
ARO:3001866	CTX-M-3	CAA71321.1	O52904	bla CTX-M3	Beta-lactamase (EC 3.5.2.6)	Citrobacter freundii
ARO:3001411	OXA-16	AAB97924.1	O52617	---	Beta-lactamase (EC 3.5.2.6) (Fragment)	Pseudomonas aeruginosa
ARO:3002568	AAC(6')-Ix	AAD03496.1	O52247	---	Aminoglycoside N(6')-acetyltransferase type 1 (EC 2.3.1.82) (Aminoglycoside resistance protein)	Acinetobacter sp. BM2722
ARO:3002567	AAC(6')-Iw	AAD03495.1	O52246	---	Aminoglycoside N(6')-acetyltransferase type 1 (EC 2.3.1.82) (Aminoglycoside resistance protein)	Acinetobacter sp. 640
ARO:3002566	AAC(6')-Iv	AAD03494.1	O52245	---	Aminoglycoside N(6')-acetyltransferase type 1 (EC 2.3.1.82) (Aminoglycoside resistance protein)	Acinetobacter sp. 631
ARO:3002565	AAC(6')-Iu	AAD03493.1	O52244	---	Aminoglycoside N(6')-acetyltransferase type 1 (EC 2.3.1.82) (Aminoglycoside resistance protein)	Acinetobacter dispersus
ARO:3002564	AAC(6')-It	AAD03492.1	O52243	---	Aminoglycoside N(6')-acetyltransferase type 1 (EC 2.3.1.82) (Aminoglycoside resistance protein)	Acinetobacter genomosp. 16BJ
ARO:3002562	AAC(6')-Is	AAD03491.1	O52242	---	Aminoglycoside N(6')-acetyltransferase type 1 (EC 2.3.1.82) (Aminoglycoside resistance protein)	Acinetobacter variabilis
ARO:3002561	AAC(6')-Ir	AAD03490.1	O52241	---	Aminoglycoside N(6')-acetyltransferase type 1 (EC 2.3.1.82) (Aminoglycoside resistance protein)	Acinetobacter genomosp. 13BJ
ARO:3002908	vanF	AAF36803.1	O52073	vanE	D-alanine--D-alanine ligase (EC 6.3.2.4) (D-Ala-D-Ala ligase) (D-alanylalanine synthetase)	Paenibacillus popilliae (Bacillus popilliae)
ARO:3001868	CTX-M-5	AAC32890.1	O34177	blaCTX-M-5	Beta-lactamase (EC 3.5.2.6)	Salmonella typhimurium
ARO:3000912	TEM-43	AAC32889.2	O34176	blaTEM-43	Beta-lactamase (EC 3.5.2.6)	Klebsiella pneumoniae
ARO:3001043	TEM-178	CAA65888.1	O33677	---	Beta-lactamase (EC 3.5.2.6)	Serratia marcescens
ARO:3002015	CMY-4	CAA75402.1	O33446	bla CMY-4	Beta-lactamase (EC 3.5.2.6) (Fragment)	Proteus mirabilis
ARO:3000343	tap	CAA03986.1	O32859	tap	Tap protein	Mycobacterium fortuitum
ARO:3000318	mphB	BAA12910.1	O32553	mphB	Macrolide 2'-phosphotransferase II (Macrolide 2'-phosphotransferase II protein MphB) (Macrolide 2-phosphotransferase, mph(B))	Escherichia coli
ARO:3000888	TEM-17	CAA74912.2	O32372	bla TEM-17	Beta-lactamase (EC 3.5.2.6)	Capnocytophaga ochracea
ARO:3002127	CMY-116	AIT76093.1	O32352	bla CF H224	Beta-lactamase (EC 3.5.2.6) (Fragment)	Citrobacter freundii
ARO:3003095	imiS	CAA71441.1	O31272	imiS	Beta-lactamase (EC 3.5.2.6)	Aeromonas veronii
ARO:3000181	tet(V)	AAB84282.1	O31137	tetV	Major facilitator superfamily MFS_1 (Tetracycline-resistance determinant tetV)	Mycobacterium smegmatis
ARO:3002703	cmx	AAG03380.1	O30996	cmxA	Cmx(A) (CmxB)	Corynebacterium striatum
ARO:3002702	cmrA	AAC45805.1	O30679	cmrA	CmrA	Rhodococcus rhodochrous
ARO:3003965	hp1184	NP_207975.1	O25796	---	Conserved hypothetical integral membrane protein	Helicobacter pylori (strain ATCC 700392 / 26695) (Campylobacter pylori)
ARO:3003964	hp1181	NP_207972.1	O25793	---	Multidrug-efflux transporter	Helicobacter pylori (strain ATCC 700392 / 26695) (Campylobacter pylori)
ARO:3002493	SRT-1	BAA23130.1	O24823	classC beta-lactamase	Beta-lactamase (EC 3.5.2.6)	Serratia marcescens
ARO:3002662	APH(9)-Ia	AAB58447.1	O06916	aph	Spectinomycin phosphotransferase	Legionella pneumophila
ARO:3003010	ceoB	AAB58161.1	O06471	ceoB	CeoB	Burkholderia cepacia (Pseudomonas cepacia)
ARO:3003009	ceoA	AAB58160.1	O06470	ceoA	CeoA	Burkholderia cepacia (Pseudomonas cepacia)
ARO:3001070	SHV-11	CAA66729.1	O06024	blaSHV-1a	Beta-lactamase (EC 3.5.2.6)	Klebsiella pneumoniae
ARO:3002824	ErmV	AAB51440.1	O05649	ermSV	rRNA (Adenine-N6-)-methyltransferase	Streptomyces viridochromogenes
ARO:3002665	npmA	BAF80809.1	A8C927	npmA	16S rRNA (adenine(1408)-N(1))-methyltransferase (EC 2.1.1.180) (16S rRNA m1A1408 methyltransferase)	Escherichia coli
ARO:3003665	NmcR	CAA79966.1	P52676	nmcR	Carbapenem-hydrolyzing beta-lactamase transcriptional activator	Enterobacter cloacae
ARO:3000820	NfxB	NP_253290.1	P32265	nfxB	HTH-type transcriptional regulator nfxB	Pseudomonas aeruginosa (strain ATCC 15692 / DSM 22644 / CIP 104116 / JCM 14847 / LMG 12228 / 1C / PRS 101 / PAO1)
ARO:3004059	Type A NfxB	NP_253290.1	P32265	nfxB	HTH-type transcriptional regulator nfxB	Pseudomonas aeruginosa (strain ATCC 15692 / DSM 22644 / CIP 104116 / JCM 14847 / LMG 12228 / 1C / PRS 101 / PAO1)
ARO:3004060	Type B NfxB	NP_253290.1	P32265	nfxB	HTH-type transcriptional regulator nfxB	Pseudomonas aeruginosa (strain ATCC 15692 / DSM 22644 / CIP 104116 / JCM 14847 / LMG 12228 / 1C / PRS 101 / PAO1)
ARO:3003756	Escherichia coli nfsB mutations conferring resistance to nitrofurantoin	NP_415110.1	P38489	nfsB	Oxygen-insensitive NAD(P)H nitroreductase (EC 1.-.-.-) (Dihydropteridine reductase) (EC 1.5.1.34) (FMN-dependent nitroreductase)	Escherichia coli (strain K12)
ARO:3003751	Escherichia coli nfsA mutations conferring resistance to nitrofurantoin	NP_415372.1	P17117	nfsA	Oxygen-insensitive NADPH nitroreductase (EC 1.-.-.-) (Modulator of drug activity A)	Escherichia coli (strain K12)
ARO:3004087	APH(3')-IX	ENV34035	N8ZRE3	---	Uncharacterized protein	Acinetobacter gerneri DSM 14967 = CIP 107464
ARO:3004090	ANT(3'')-IIb	ENU91137	N8W714	---	Uncharacterized protein	Acinetobacter sp. NIPH 758
ARO:3004091	ANT(3'')-IIc	ENU37733	N8RQT1	---	Uncharacterized protein	Acinetobacter parvus DSM 16617 = CIP 108168
ARO:3002255	CARB-16	CCW43444.1	N1NTC9	blaRTG-6	Beta-lactamase (EC 3.5.2.6)	Psychrobacter maritimus
ARO:3001383	TEM-206	AGK82336.1	N0D6W6	TEM-206	Beta-lactamase (EC 3.5.2.6)	Escherichia coli
ARO:3001306	ErmW	BAA03402.1	P43433	myrB	Mycinamicin-resistance protein MyrB (EC 2.1.1.-)	Micromonospora griseorubida
ARO:3001300	myrA	BAA03674.1	P37000	myrA	Putative 23S rRNA (guanine-N(1)-)-methyltransferase (EC 2.1.1.-) (Mycinamicin-resistance protein MyrA)	Micromonospora griseorubida
ARO:3003776	Staphylococcus aureus murA with mutation conferring resistance to fosfomycin	CAG41169	Q6GEX5	murA1	UDP-N-acetylglucosamine 1-carboxyvinyltransferase 1 (EC 2.5.1.7) (Enoylpyruvate transferase 1) (UDP-N-acetylglucosamine enolpyruvyl transferase 1) (EPT 1)	Staphylococcus aureus (strain MRSA252)
ARO:3003777	Borrelia burgdorferi murA with mutation conferring resistance to fosfomycin	NP_212606	O51428	murA	UDP-N-acetylglucosamine 1-carboxyvinyltransferase (EC 2.5.1.7) (Enoylpyruvate transferase) (UDP-N-acetylglucosamine enolpyruvyl transferase) (EPT)	Borrelia burgdorferi (strain ATCC 35210 / B31 / CIP 102532 / DSM 4680)
ARO:3000816	mtrA	CCP46065.1	P9WGM7	mtrA	DNA-binding response regulator MtrA	Mycobacterium tuberculosis (strain ATCC 25618 / H37Rv)
ARO:3004038	Pseudomonas aeruginosa emrE	NP_253677.1	Q9HUH5	---	Multidrug transporter PA4990	Pseudomonas aeruginosa (strain ATCC 15692 / DSM 22644 / CIP 104116 / JCM 14847 / LMG 12228 / 1C / PRS 101 / PAO1)
ARO:3002818	msrB	NP_416292.1	P0A746	msrB	Peptide methionine sulfoxide reductase MsrB (EC 1.8.4.12) (Peptide-methionine (R)-S-oxide reductase)	Escherichia coli (strain K12)
ARO:3003950	msbA	NP_415434.1	P60752	msbA	Lipid A export ATP-binding/permease protein MsbA (EC 3.6.3.-)	Escherichia coli (strain K12)
ARO:3003324	Bacillus subtilis mprF	CAX52582.1	C0H3X7	mprF	Phosphatidylglycerol lysyltransferase (EC 2.3.2.3) (Lysylphosphatidylglycerol synthase) (LPG synthase)	Bacillus subtilis (strain 168)
ARO:3000516	emrR	NP_417169.1	P0ACR9	mprA	Transcriptional repressor MprA (Protein EmrR)	Escherichia coli (strain K12)
ARO:3003820	mgrB	NP_416340.1	P64512	mgrB	PhoP/PhoQ regulator MgrB	Escherichia coli (strain K12)
ARO:3003035	mfpA	CCP46182.1	I6YBX3	mfpA	Pentapeptide repeat protein MfpA (MfpAMt)	Mycobacterium tuberculosis (strain ATCC 25618 / H37Rv)
ARO:3003844	mfd	NP_415632.1	P30958	mfd	Transcription-repair-coupling factor (TRCF) (EC 3.6.4.-)	Escherichia coli (strain K12)
ARO:3000506	MexR	NP_249115.1	P52003	mexR	Multidrug resistance operon repressor	Pseudomonas aeruginosa (strain ATCC 15692 / DSM 22644 / CIP 104116 / JCM 14847 / LMG 12228 / 1C / PRS 101 / PAO1)
ARO:3000506	MexR	NP_249115.1	P52003	mexR	Multidrug resistance operon repressor	Pseudomonas aeruginosa (strain ATCC 15692 / DSM 22644 / CIP 104116 / JCM 14847 / LMG 12228 / 1C / PRS 101 / PAO1)
ARO:3000378	MexB	AAA74437.1	P52002	mexB	Multidrug resistance protein MexB (Multidrug-efflux transporter MexB)	Pseudomonas aeruginosa (strain ATCC 15692 / DSM 22644 / CIP 104116 / JCM 14847 / LMG 12228 / 1C / PRS 101 / PAO1)
ARO:3000377	MexA	NP_249116.1	P52477	mexA	Multidrug resistance protein MexA	Pseudomonas aeruginosa (strain ATCC 15692 / DSM 22644 / CIP 104116 / JCM 14847 / LMG 12228 / 1C / PRS 101 / PAO1)
ARO:3000026	mepA	AAU95768.1	Q2G140	mepA	Multidrug export protein MepA (Staphylococcal virulence regulator protein A)	Staphylococcus aureus (strain NCTC 8325)
ARO:3003550	mdtP	BAE78082.1	P32714	mdtP	Multidrug resistance outer membrane protein MdtP	Escherichia coli (strain K12)
ARO:3003549	mdtO	BAE78083.1	P32715	mdtO	Multidrug resistance protein MdtO	Escherichia coli (strain K12)
ARO:3003548	mdtN	BAE78084.1	P32716	mdtN	Multidrug resistance protein MdtN	Escherichia coli (strain K12)
ARO:3001214	mdtM	AAC77293.1	P39386	mdtM	Multidrug resistance protein MdtM	Escherichia coli (strain K12)
ARO:3001215	mdtL	AAC76733.1	P31462	mdtL	Multidrug resistance protein MdtL	Escherichia coli (strain K12)
ARO:3001216	mdtH	AAC74149.2	P69367	mdtH	Multidrug resistance protein MdtH	Escherichia coli (strain K12)
ARO:3000796	mdtF	AAC76539.1	P37637	mdtF	Multidrug resistance protein MdtF	Escherichia coli (strain K12)
ARO:3000795	mdtE	BAE77781.1	P37636	mdtE	Multidrug resistance protein MdtE	Escherichia coli (strain K12)
ARO:3001330	mdtD	AAC75138.1	P36554	mdtD	Putative multidrug resistance protein MdtD	Escherichia coli (strain K12)
ARO:3000794	mdtC	AAC75137.1	P76399	mdtC	Multidrug resistance protein MdtC (Multidrug transporter MdtC)	Escherichia coli (strain K12)
ARO:3000793	mdtB	AAC75136.1	P76398	mdtB	Multidrug resistance protein MdtB (Multidrug transporter MdtB)	Escherichia coli (strain K12)
ARO:3000792	mdtA	AAC75135.2	P76397	mdtA	Multidrug resistance protein MdtA (Multidrug transporter MdtA)	Escherichia coli (strain K12)
ARO:3003689	MCR-1	AKF16168	A0A0R6L508	mcr1	Probable phosphatidylethanolamine transferase Mcr-1 (EC 2.7.-.-) (Polymyxin resistance protein MCR-1)	Escherichia coli
ARO:3003378	Escherichia coli marR mutant conferring antibiotic resistance	AAC74603.2	P27245	marR	Multiple antibiotic resistance protein MarR	Escherichia coli (strain K12)
ARO:3000535	macB	AAV85982.1	Q5MK06	macB	Macrolide export ATP-binding/permease protein MacB (EC 3.6.3.-)	Neisseria gonorrhoeae
ARO:3001694	OXA-257	AGK07370.1	M9XLN6	---	Beta-lactamase OXA-257	Acinetobacter bereziniae (Acinetobacter genomosp. 10)
ARO:3001689	OXA-253	AGK07368.1	M9XFV5	blaOXA-253	Beta-lactamase OXA-253 (Class D beta-lactamase)	Acinetobacter baumannii
ARO:3001690	OXA-255	AGK07369.1	M9XD84	blaOXA-255	Beta-lactamase OXA-255	Acinetobacter pittii (Acinetobacter genomosp. 3)
ARO:3002326	KPC-16	AGJ01153.1	M9T8M5	blaKPC-16	Beta-lactamase (EC 3.5.2.6)	Klebsiella pneumoniae
ARO:3002327	KPC-17	AGJ01154.1	M9T6C6	blaKPC-17	Beta-lactamase (EC 3.5.2.6)	Klebsiella pneumoniae
ARO:3001681	OXA-278	AGI65307.1	M9QY09	blaOXA-278	OXA-278 carbapenemase	Acinetobacter schindleri
ARO:3001375	TEM-184	CCA61905.1	M5B5Q1	blaTEM-184	Beta-lactamase (EC 3.5.2.6)	Escherichia coli
ARO:3001682	OXA-254	BAN10684.1	M5APG1	blaOXA-254	BlaOXA-51-like beta-lactamase	Acinetobacter baumannii
ARO:3002774	QnrB61	BAN04737.1	M5A7R2	qnrB61	QnrB61	Citrobacter braakii
ARO:3002773	QnrB60	BAN04743.1	M5A7G7	qnrB60	QnrB60	Citrobacter freundii
ARO:3002234	IMP-43	BAM98935.1	M4ZRQ3	blaIMP-43	Beta-lactamase (EC 3.5.2.6)	Pseudomonas aeruginosa
ARO:3002235	IMP-44	BAM98942.1	M4ZQE9	blaIMP-44	Beta-lactamase (EC 3.5.2.6)	Pseudomonas aeruginosa
ARO:3002836	lnuB	AGI42804.1	M4YDX6	lnuB	Lincosamine nucleotidyl transferase	Streptococcus lutetiensis
ARO:3002111	CMY-98	AGH70380.1	M4T989	blaCMY-98	Beta-lactamase (EC 3.5.2.6)	Citrobacter freundii
ARO:3002377	VEB-8	AGH33739.1	M4QST3	---	Beta-lactamase (EC 3.5.2.6)	Escherichia coli
ARO:3003198	rmtH	AGH19769.1	M4Q6L3	rmtH	RmtH	Klebsiella pneumoniae
ARO:3001778	OXA-232	AGD91915.1	M4JTK1	blaOXA-232	Beta-lactamase (EC 3.5.2.6)	Escherichia coli
ARO:3001344	SHV-143	AFQ32277.1	M4HN29	blaSHV-143	Beta-lactamase (EC 3.5.2.6)	Klebsiella pneumoniae
ARO:3002358	NDM-8	BAM84089.1	M1VE66	blaNDM-8	Metallo-beta-lactamase NDM-8 (NDM-8 metallo-beta-lactamase)	Escherichia coli
ARO:3001995	CTX-M-136	AGG08693.1	M1QVD4	blaCTX-M-136	Beta-lactamase (EC 3.5.2.6)	Proteus mirabilis
ARO:3002325	KPC-15	AGF70638.1	M1NGU8	---	Beta-lactamase (EC 3.5.2.6)	Klebsiella pneumoniae
ARO:3002308	VIM-38	AGE83081.2	M1JB36	VIM-38	Metallo-beta-lactamase	Pseudomonas aeruginosa
ARO:3001984	CTX-M-125	AFO69261.1	M1F7E6	---	Beta-lactamase (EC 3.5.2.6)	Enterobacter cloacae
ARO:3003920	pgpB	BAG33043.1	B2RI48	lpxF	Lipid A 4'-phosphatase (EC 3.1.-.-)	Porphyromonas gingivalis (strain ATCC 33277 / DSM 20709 / CIP 103683 / JCM 12257 / NCTC 11834 / 2561)
ARO:3003028	lmrA	CAB12062.1	O34619	lmrA	HTH-type transcriptional regulator LmrA	Bacillus subtilis (strain 168)
ARO:3000272	linA	AAA26652.1	P06107	linA	Lincosamide resistance protein	Staphylococcus haemolyticus
ARO:3003843	leuO	NP_414618.4	P10151	leuO	HTH-type transcriptional regulator LeuO	Escherichia coli (strain K12)
ARO:3003687	APH(3')-VI	AGI04227.1	L8BSZ1	aphA6	Aminoglycoside (3') phosphotransferase (Aminoglycoside (3') phosphotransferase APH(3')-VI) (Aminoglycoside 3'-phosphotransferase type 6)	Pseudomonas aeruginosa
ARO:3000904	TEM-34	AGE11905.1	L7ZBF5	blaTEM-34	Beta-lactamase (EC 3.5.2.6)	Haemophilus parainfluenzae
ARO:3002668	rmtG	AGE00988.1	L7YCW5	rmtG	16S rRNA methyltransferase (RmtG)	Klebsiella pneumoniae
ARO:3000848	DIM-1 beta-lactamase	AGC92784.1	L7X1X1	blaDIM-1	Metallo-beta-lactamase DIM-1	Enterobacter sp. SL1
ARO:3001791	OXA-247	AGC70814.1	L7VTN5	blaOXA-247	Beta-lactamase (EC 3.5.2.6)	Klebsiella pneumoniae
ARO:3001787	OXA-245	AGC60013.1	L7V1I2	blaOXA-245	Beta-lactamase (EC 3.5.2.6)	Klebsiella pneumoniae
ARO:3001786	OXA-244	AGC60012.1	L7UXE1	blaOXA-244	Beta-lactamase (EC 3.5.2.6)	Klebsiella pneumoniae
ARO:3002107	CMY-94	AGC54798.1	L7UW18	CMY	Beta-lactamase (EC 3.5.2.6)	Escherichia coli
ARO:3002108	CMY-95	AGC54799.1	L7UV13	CMY	Beta-lactamase (EC 3.5.2.6)	Escherichia coli
ARO:3002306	VIM-36	AGC50806.1	L7US14	blaVIM-36	Metallo-beta-lactamase (Fragment)	Pseudomonas aeruginosa
ARO:3002307	VIM-37	AGC50807.1	L7UNF1	blaVIM-37	Metallo-beta-lactamase (Fragment)	Pseudomonas aeruginosa
ARO:3002305	VIM-35	AGC50805.1	L7UN39	blaVIM-35	Metallo-beta-lactamase (Fragment)	Klebsiella oxytoca
ARO:3000617	mecA	AGC51118.1	L7UL38	mecA	MecA	Staphylococcus aureus
ARO:3002853	arr-8	AGC29882.1	L7TBZ5	arr-8	Rifampin ADP-ribosylating transferase	Klebsiella oxytoca
ARO:3001835	ACT-13	CCK86741.1	L0R2B4	blaACT-13	Beta-lactamase (EC 3.5.2.6)	Enterobacter asburiae
ARO:3002103	CMY-90	CCK86743.1	L0R279	blaCMY-90	Beta-lactamase (EC 3.5.2.6)	Citrobacter freundii
ARO:3001819	ACC-5	CCK86740.1	L0R244	blaACC-5	Beta-lactamase (EC 3.5.2.6)	Hafnia alvei
ARO:3001369	TEM-153	AGA83484.1	L0GCN8	blaTEM-153	Beta-lactamase (EC 3.5.2.6)	Escherichia coli
ARO:3002650	APH(3')-Vb	AAC32025.1	P13250	rph	Aminoglycoside 3'-phosphotransferase (EC 2.7.1.95) (APH(3')) (Kanamycin kinase) (Ribostamycin phosphotransferase)	Streptomyces ribosidificus
ARO:3002642	APH(3')-Ib	AAA26412.1	P14509	aphA	Aminoglycoside 3'-phosphotransferase (EC 2.7.1.95) (APH(3')VIII) (Kanamycin kinase, type VIII) (Neomycin-kanamycin phosphotransferase type VIII)	Escherichia coli
ARO:3002654	APH(3')-VIIa	AAA76822.1	P14508	aphA-7	Aminoglycoside 3'-phosphotransferase (EC 2.7.1.95) (APH(3')VII) (Kanamycin kinase, type VII) (Neomycin-kanamycin phosphotransferase type VII)	Campylobacter jejuni
ARO:3002652	APH(3')-VIa	CAA30578.1	P09885	aphA-6	Aminoglycoside 3'-phosphotransferase (EC 2.7.1.95) (APH(3')VI) (Kanamycin kinase, type VI) (Neomycin-kanamycin phosphotransferase type VI)	Acinetobacter baumannii
ARO:3002649	APH(3')-Va	AAA26699.1	P00555	aph	Aminoglycoside 3'-phosphotransferase (EC 2.7.1.95) (APH(3')V) (Kanamycin kinase, type V) (Neomycin-kanamycin phosphotransferase type V)	Streptomyces fradiae (Streptomyces roseoflavus)
ARO:3002648	APH(3')-IVa	CAA27061.1	P00553	aphA4	Aminoglycoside 3'-phosphotransferase (EC 2.7.1.95) (APH(3')IV) (Butirosin resistance protein A) (Kanamycin kinase, type IV) (Neomycin-kanamycin phosphotransferase type IV)	Bacillus circulans
ARO:3002661	APH(7'')-Ia	CAA27276.1	P09979	hyg	Hygromycin-B 7''-O-kinase (EC 2.7.1.119) (APH(7'')) (Hygromycin B phosphotransferase) (Hygromycin-B kinase)	Streptomyces hygroscopicus
ARO:3002655	APH(4)-Ia	CAA24743.1	P00557	hph	Hygromycin-B 4-O-kinase (EC 2.7.1.163) (APH(4)) (Hygromycin B phosphotransferase) (Hygromycin-B kinase)	Escherichia coli
ARO:3003841	kdpE	NP_415222.1	P21866	kdpE	KDP operon transcriptional regulatory protein KdpE	Escherichia coli (strain K12)
ARO:3003905	ANT(4')-Ib	YP_006938491.1	P05057	knt	Kanamycin nucleotidyltransferase (Neo(R)) (EC 2.7.7.-)	Staphylococcus aureus
ARO:3001997	CTX-M-139	AFY98865.1	K9UTH3	---	Beta-lactamase (EC 3.5.2.6)	Escherichia coli
ARO:3002775	QnrB62	AFY16910.1	K9NBS2	qnrB62	QnrB62	Citrobacter freundii
ARO:3002223	IMP-32	AFR33816.1	K9M695	blaIMP-32	Metallo-beta-lactamase IMP-32 (EC 3.5.2.6)	Klebsiella pneumoniae
ARO:3004033	tetB(46)	AET10445.1	K9KYI4	steB	ABC transporter subunit B	Streptococcus australis
ARO:3004032	tetA(46)	AET10444.1	K9KYH6	steA	ABC transporter subunit A	Streptococcus australis
ARO:3001992	CTX-M-134	AFX60298.1	K7WEV5	blaCTX-M-134	Beta-lactamase (EC 3.5.2.6)	Escherichia coli
ARO:3001352	SHV-168	AFW16978.1	K7U492	SHV-168	Beta-lactamase (EC 3.5.2.6)	Klebsiella pneumoniae
ARO:3000910	TEM-40	CBX53726.1	K4Q514	blaTEM-40	Beta-lactamase (EC 3.5.2.6)	Escherichia coli
ARO:3002231	IMP-40	BAM62794.1	K4Q303	blaIMP-40	Beta-lactamase (EC 3.5.2.6)	Pseudomonas aeruginosa
ARO:3002232	IMP-41	BAM62795.1	K4PXL9	blaIMP-41	Beta-lactamase (EC 3.5.2.6)	Pseudomonas aeruginosa
ARO:3002233	IMP-42	BAM62793.1	K4PWH4	blaIMP-42	Beta-lactamase (EC 3.5.2.6)	Acinetobacter soli
ARO:3002324	KPC-14	AFV48348.1	K4NUK1	blaKPC-14	Beta-lactamase (EC 3.5.2.6)	Klebsiella pneumoniae
ARO:3001788	OXA-204	AFU91598.1	K4JY39	blaOXA-204	Beta-lactamase (EC 3.5.2.6)	Klebsiella pneumoniae
ARO:3001673	OXA-248	CCJ32596.1	K0M837	blaOXA-248	Beta-lactamase	Acinetobacter baumannii
ARO:3001675	OXA-250	CCJ32598.1	K0M713	blaOXA-250	Beta-lactamase	Acinetobacter baumannii
ARO:3001674	OXA-249	CCJ32597.1	K0M068	blaOXA-249	Beta-lactamase	Acinetobacter baumannii
ARO:3003677	AAC(6')-Iaj	BAM46120.1	K0IV17	aac(6')-Iaj	Aminoglycoside 6'-N-acetyltransferase	Pseudomonas aeruginosa
ARO:3000275	linB	AFU35066.1	K0HFM5	lnu(B)	Lincosamide nucleotidyltransferase	Staphylococcus aureus
ARO:3002090	CMY-77	AFU25644.1	K0GLV6	blaCMY-77	Beta-lactamase (EC 3.5.2.6)	Citrobacter sp. W1065
ARO:3002762	QnrB47	AFU25658.1	K0GG75	qnrB51	Pentapeptide repeat protein QnrB51	Citrobacter freundii
ARO:3001837	ACT-15	AFU25653.1	K0GG70	blaACT-15	Beta-lactamase (EC 3.5.2.6)	Enterobacter cloacae
ARO:3002096	CMY-83	AFU25638.1	K0GG60	blaCMY-83	Beta-lactamase (EC 3.5.2.6)	Citrobacter braakii
ARO:3002351	GES-22	AFU25739.1	K0GF29	blaGES-22	Beta-lactamase (EC 3.5.2.6)	Acinetobacter baumannii
ARO:3001836	ACT-14	AFU25647.1	K0GEV3	blaACT-14	Beta-lactamase (EC 3.5.2.6)	Enterobacter cloacae
ARO:3001834	ACT-12	AFU25650.1	K0GEV1	blaACT-12	Beta-lactamase (EC 3.5.2.6)	Enterobacter cloacae
ARO:3002087	CMY-74	AFU25632.1	K0GET7	blaCMY-74	Beta-lactamase (EC 3.5.2.6)	Citrobacter braakii
ARO:3002083	CMY-70	AFU25635.1	K0GES5	blaCMY-70	Beta-lactamase (EC 3.5.2.6)	Citrobacter braakii
ARO:3002765	QnrB50	AFU25656.1	K0G796	qnrB50	Pentapeptide repeat protein QnrB50	Citrobacter freundii
ARO:3001378	TEM-201	AFS44742.1	J9YNF9	blaTEM-201	Beta-lactamase (EC 3.5.2.6)	Escherichia coli
ARO:3002772	QnrB59	AFR46590.1	J9S7E8	qnrB59	Quinolone resistance protein B59	Citrobacter freundii
ARO:3002769	QnrB56	AFR46587.1	J9RZA4	qnrB56	Quinolone resistance protein B56	Citrobacter freundii
ARO:3002770	QnrB57	AFR46588.1	J9RV50	qnrB57	Quinolone resistance protein B57	Citrobacter freundii
ARO:3002771	QnrB58	AFR46589.1	J9RDG6	qnrB58	Quinolone resistance protein B58	Citrobacter freundii
ARO:3001991	CTX-M-132	AFQ94051.1	J7KCB4	blaCTX-M-132	Beta-lactamase (EC 3.5.2.6)	Escherichia coli
ARO:3001610	OXA-243	AFQ90085.1	J7JZP6	bla OXA-243a	Beta-lactamase (EC 3.5.2.6)	Alcaligenes xylosoxydans xylosoxydans (Achromobacter xylosoxidans)
ARO:3001200	SHV-161	AFQ23967.1	J7I6N7	blaSHV-161	Beta-lactamase (EC 3.5.2.6)	Klebsiella pneumoniae
ARO:3001195	SHV-156	AFQ23962.1	J7I6N3	blaSHV-156	Beta-lactamase (EC 3.5.2.6)	Klebsiella pneumoniae
ARO:3001190	SHV-151	AFQ23957.1	J7I6M7	blaSHV-151	Beta-lactamase (EC 3.5.2.6) (Fragment)	Klebsiella pneumoniae
ARO:3001202	SHV-163	AFQ23969.1	J7I622	blaSHV-163	Beta-lactamase (EC 3.5.2.6) (Fragment)	Klebsiella pneumoniae
ARO:3001197	SHV-158	AFQ23964.1	J7I616	blaSHV-158	Beta-lactamase (EC 3.5.2.6) (Fragment)	Klebsiella pneumoniae
ARO:3001192	SHV-153	AFQ23959.1	J7I612	blaSHV-153	Beta-lactamase (EC 3.5.2.6) (Fragment)	Klebsiella pneumoniae
ARO:3001187	SHV-148	AFQ23954.1	J7I607	blaSHV-148	Beta-lactamase (EC 3.5.2.6) (Fragment)	Klebsiella pneumoniae
ARO:3001203	SHV-165	AFQ23970.1	J7I2W6	blaSHV-165	Beta-lactamase (EC 3.5.2.6) (Fragment)	Klebsiella pneumoniae
ARO:3001198	SHV-159	AFQ23965.1	J7I2W1	blaSHV-159	Beta-lactamase (EC 3.5.2.6) (Fragment)	Klebsiella pneumoniae
ARO:3001193	SHV-154	AFQ23960.1	J7I2V5	blaSHV-154	Beta-lactamase (EC 3.5.2.6) (Fragment)	Klebsiella pneumoniae
ARO:3001188	SHV-149	AFQ23955.1	J7I2U9	blaSHV-149	Beta-lactamase (EC 3.5.2.6) (Fragment)	Klebsiella pneumoniae
ARO:3002357	NDM-7	AFQ31613.1	J7I0S9	blaNDM-7	Beta-lactamase NDM-7 (Class B carbapenemase NDM-7) (Metallo-beta-lactamase NDM-7) (NDM-7) (NDM-7 metallo-beta-lactamase) (New Delhi metallo beta lactamase 7)	Escherichia coli
ARO:3001199	SHV-160	AFQ23966.1	J7HZS0	blaSHV-160	Beta-lactamase (EC 3.5.2.6)	Klebsiella pneumoniae
ARO:3001194	SHV-155	AFQ23961.1	J7HZR6	blaSHV-155	Beta-lactamase (EC 3.5.2.6) (Fragment)	Klebsiella pneumoniae
ARO:3001189	SHV-150	AFQ23956.1	J7HZR2	blaSHV-150	Beta-lactamase (EC 3.5.2.6) (Fragment)	Klebsiella pneumoniae
ARO:3001201	SHV-162	AFQ23968.1	J7HZC1	blaSHV-162	Beta-lactamase (EC 3.5.2.6) (Fragment)	Klebsiella pneumoniae
ARO:3001196	SHV-157	AFQ23963.1	J7HZB6	blaSHV-157	Beta-lactamase (EC 3.5.2.6)	Klebsiella pneumoniae
ARO:3001191	SHV-152	AFQ23958.1	J7HZA9	blaSHV-152	Beta-lactamase (EC 3.5.2.6) (Fragment)	Klebsiella pneumoniae
ARO:3001186	SHV-147	AFQ23953.1	J7HZA4	blaSHV-147	Beta-lactamase (EC 3.5.2.6) (Fragment)	Klebsiella pneumoniae
ARO:3002299	VIM-29	AFP99885.1	J7HGI2	---	VIM-type beta-lactamase	Escherichia coli
ARO:3002228	IMP-37	AFP97028.1	J7HFH1	blaIMP-37	Beta-lactamase (EC 3.5.2.6)	Pseudomonas aeruginosa
ARO:3002303	VIM-33	AFP99175.1	J7HBJ4	blaVIM-33	Carbapenem hydrolyzing beta-lactamase VIM-33 (Carbapenemase VIM-33) (VIM-33 metallo-beta-lactamase)	Klebsiella pneumoniae
ARO:3002252	CARB-14	AFI72872.1	J3S801	blaRTG-5	Beta-lactamase (EC 3.5.2.6)	Acinetobacter baumannii
ARO:3003451	Mycobacterium tuberculosis iniC mutant conferring resistance to ethambutol	CCP43073.1	P9WJ95	iniC	Isoniazid-induced protein IniC	Mycobacterium tuberculosis (strain ATCC 25618 / H37Rv)
ARO:3003448	Mycobacterium tuberculosis iniA mutant conferring resistance to Ethambutol	CCP43072.1	P9WJ99	iniA	Isoniazid-induced protein IniA	Mycobacterium tuberculosis (strain ATCC 25618 / H37Rv)
ARO:3003393	Mycobacterium tuberculosis inhA mutations conferring resistance to isoniazid	CCP44244.1	P9WGR1	inhA	Enoyl-[acyl-carrier-protein] reductase [NADH] (ENR) (Enoyl-ACP reductase) (EC 1.3.1.9) (FAS-II enoyl-ACP reductase) (NADH-dependent 2-trans-enoyl-ACP reductase)	Mycobacterium tuberculosis (strain ATCC 25618 / H37Rv)
ARO:3003205	Erm(43)	CCF55073.1	I7J507	erm(43)	Erm(43) (Ribosomal RNA adenine methylase Erm(43))	Staphylococcus lentus
ARO:3001827	ACT-16	BAM34463.1	I7GUM0	blaACT-16	Beta-lactamase (EC 3.5.2.6) (Fragment)	Enterobacter cloacae
ARO:3001204	SHV-167	BAM28879.1	I7GSH3	blaSHV-167	Beta-lactamase (EC 3.5.2.6) (Fragment)	Klebsiella pneumoniae
ARO:3001679	OXA-241	AFO55201.1	I7CRF1	blaOXA-241	Beta-lactamase OXA-241	Acinetobacter baumannii
ARO:3002226	IMP-35	AFO59566.1	I7CP04	IMP-35	Beta-lactamase (EC 3.5.2.6)	Pseudomonas aeruginosa
ARO:3002883	rgt1438	AFO53532.1	I7BL40	---	Rifampin glycosyltransferase	Streptomyces sp. WAC1438
ARO:3001680	OXA-242	AFO55202.1	I7BG71	blaOXA-242	Beta-lactamase OXA-242	Acinetobacter baumannii
ARO:3001185	SHV-145	AFN88952.1	I7B447	blaSHV-145	Beta-lactamase (EC 3.5.2.6)	Klebsiella pneumoniae
ARO:3002304	VIM-34	AFN88953.1	I6ZVA9	blaVIM-34	Metallo-beta-lactamase VIM-34 (VIM-34 metallo-beta-lactamase)	Klebsiella pneumoniae
ARO:3001058	TEM-199	AFN69127.1	I6ZQ49	blaTEM-199	Beta-lactamase (EC 3.5.2.6) (Fragment)	Proteus mirabilis
ARO:3003955	efpA	NP_217362.1	I6YEI8	---	MFS transporter	Mycobacterium tuberculosis (strain ATCC 25618 / H37Rv)
ARO:3001498	OXA-239	AFN65709.1	I6YCI1	OXA-239	OXA-239	Acinetobacter sp. enrichment culture clone 8407
ARO:3001499	OXA-240	AFN20670.1	I6VVS5	OXA-240	Beta-lactamase (EC 3.5.2.6)	Pseudomonas aeruginosa
ARO:3000890	TEM-19	AFN21551.1	I6VD99	blaTEM-19	Beta-lactamase (EC 3.5.2.6)	Acinetobacter baumannii
ARO:3001692	OXA-229	AFM55000.1	I6S7G0	blaOXA-229	Beta-lactamase OXA-229	Acinetobacter bereziniae (Acinetobacter genomosp. 10)
ARO:3001693	OXA-230	AFM55002.1	I6S387	blaOXA-230	Beta-lactamase OXA-230	Acinetobacter bereziniae (Acinetobacter genomosp. 10)
ARO:3003206	lsaE	AFU35065.1	I6R5C6	lsa(E)	ABC transporter	Staphylococcus aureus
ARO:3002630	ANT(9)-Ia	AFU35063.1	I6R254	spc	Streptomycin 3''-adenylyltransferase (EC 2.7.7.47)	Staphylococcus aureus
ARO:3001691	OXA-228	AFM55001.1	I6R1R3	blaOXA-228	Beta-lactamase OXA-228	Acinetobacter bereziniae (Acinetobacter genomosp. 10)
ARO:3003723	vanI	AEP96393.1	I6N8I4	vanA	D-alanine-D-lactate ligase (Fragment)	Desulfitobacterium hafniense DP7
ARO:3001345	SHV-144	AFK93491.1	I3WA87	blaSHV-144	Beta-lactamase (EC 3.5.2.6)	Klebsiella pneumoniae
ARO:3002350	GES-21	AFK80745.1	I3VLI2	---	Beta-lactamase (EC 3.5.2.6)	uncultured bacterium
ARO:3002354	NDM-3	AFK80349.1	I3VKD5	NDM-3	Metallo-beta-lactamase NDM-3 (NDM-3 metallo-beta-lactamase)	Escherichia coli
ARO:3001313	facT	AFK80333.1	I3VKB9	---	Putative transporter	Streptomyces sp. WAC5292
ARO:3002097	CMY-84	AFK73455.1	I3V6A2	blaCMY-84	Beta-lactamase (EC 3.5.2.6)	Citrobacter freundii
ARO:3002094	CMY-81	AFK73452.1	I3V699	blaCMY-81	Beta-lactamase (EC 3.5.2.6)	Citrobacter freundii
ARO:3002093	CMY-80	AFK73449.1	I3V696	blaCMY-80	Beta-lactamase (EC 3.5.2.6)	Citrobacter freundii
ARO:3002092	CMY-79	AFK73446.1	I3V693	blaCMY-79	Beta-lactamase (EC 3.5.2.6)	Citrobacter freundii
ARO:3002091	CMY-78	AFK73443.1	I3V690	blaCMY-78	Beta-lactamase (EC 3.5.2.6)	Citrobacter freundii
ARO:3002089	CMY-76	AFK73437.1	I3V684	blaCMY-76	Beta-lactamase (EC 3.5.2.6)	Citrobacter freundii
ARO:3002062	CMY-51	AFK73431.1	I3V678	blaCMY-51	Beta-lactamase (EC 3.5.2.6)	Citrobacter freundii
ARO:3003438	Enterococcus faecium EF-Tu mutants conferring resistance to GE2270A	YP_006374661.1	I3TY41	tufA	Elongation factor Tu (EF-Tu)	Enterococcus faecium DO
ARO:3001485	OXA-207	AFK28473.1	I3RRQ3	bla-OXA-207	Beta-lactamase OXA-207	Acinetobacter pittii (Acinetobacter genomosp. 3)
ARO:3002301	VIM-31	AFK24647.1	I3RJZ3	blaVIM-31	Metallo-beta-lactamase VIM-31 (VIM-31)	Enterobacter cloacae
ARO:3000823	ramA	AFK13828.1	I3QPX7	ramA	RamA	Enterobacter cloacae
ARO:3000825	robA	AFK13827.1	I3QPX6	robA	RobA	Enterobacter cloacae
ARO:3002080	CMY-67	AFK08541.1	I3QHT7	blaCMY-67	Beta-lactamase (EC 3.5.2.6)	Citrobacter freundii
ARO:3002084	CMY-71	AFK08538.1	I3QHT4	blaCMY-71	Beta-lactamase (EC 3.5.2.6)	Citrobacter freundii
ARO:3002171	MIR-6	AFJ79785.1	I2DC43	blaMIR-6	Beta-lactamase (EC 3.5.2.6)	Enterobacter cloacae
ARO:3002666	rmtF	AFJ11385.1	I1YZZ5	rmtF	16S rRNA methylase RmtF (Aminoglycoside 16s rRNA methyltransferase) (Ribosomal RNA methyltransferase)	Klebsiella pneumoniae
ARO:3003879	ADC-61	WP_033503051.1	I1VZH1	blaADC-61	Beta-lactamase (EC 3.5.2.6)	Acinetobacter baumannii
ARO:3003039	OprA	BAM10414.1	I0IYR5	oprA	Outer membrane protein	Pseudomonas aeruginosa
ARO:3000856	BJP-1 beta-lactamase	BAL75272.1	I0G3D5	BJP-1	Putative beta-lactamase	Bradyrhizobium sp. S23321
ARO:3002763	QnrB48	AFH88686.1	I0DFZ0	qnrB48	Quinolone resistance protein QnrB48	Citrobacter freundii
ARO:3001983	CTX-M-124	AFH88134.1	I0DEV3	blaCTX-M-124	Beta-lactamase (EC 3.5.2.6)	Escherichia coli
ARO:3003887	ADC-81	WP_059262723.1	I0CDW3	ampC	Beta-lactamase (EC 3.5.2.6)	Acinetobacter baumannii
ARO:3000676	H-NS	NP_309766.1	P0ACG0	hns	DNA-binding protein H-NS (Histone-like protein HLP-II) (Protein B1) (Protein H1)	Escherichia coli O157:H7
ARO:3001677	OXA-236	AFH36332.1	H9ZJK0	blaOXA-236	Beta-lactamase (EC 3.5.2.6)	Acinetobacter baumannii
ARO:3001678	OXA-237	AFH36331.1	H9ZJJ9	blaOXA-237	Beta-lactamase (EC 3.5.2.6)	Acinetobacter baumannii
ARO:3001676	OXA-235	AFH36330.1	H9ZJJ8	blaOXA-235	Beta-lactamase (EC 3.5.2.6)	Acinetobacter baumannii
ARO:3001328	MdfA	AFH35853.1	H9ZIN1	mdfA	MdfA	Escherichia coli
ARO:3001670	OXA-231	AFG29918.1	H9U2W6	blaOXA-231	Beta-lactamase OXA-231 (Carbapenem-hydrolyzing class D beta-lactamase)	Acinetobacter baumannii
ARO:3002741	QnrB26	AEH59666.1	H9LTL8	qnrB26	Quinolone resistance protein	Proteus vulgaris
ARO:3000826	sdiA	NP_460903.1	H9L4B0	sdiA	Transcriptional regulator of ftsQAZ gene cluster	Salmonella typhimurium (strain LT2 / SGSC1412 / ATCC 700720)
ARO:3002681	catB9	AAL68645.1	H9L3X9	catB9	Acetyltransferase (EC 2.3.1.28) (Chloramphenicol acetyltransferase) (Type B chloramphenicol O-acetyltransferase)	Vibrio cholerae
ARO:3002764	QnrB49	AFD54601.1	H9D2X0	---	QnrB49	Citrobacter freundii
ARO:3001183	SHV-141	AFC60795.1	H9CTU8	---	Beta-lactamase (EC 3.5.2.6)	Klebsiella pneumoniae
ARO:3000567	tet(40)	AFK31666.1	H9CDJ3	tet40	Tetracycline resistance protein 40 (Tetracycline resistance protein Tet40)	Streptococcus suis
ARO:3001376	TEM-196	AFE48832.1	H9BJT1	---	Beta-lactamase (EC 3.5.2.6)	Shigella sonnei
ARO:3001055	TEM-195	AFC75525.1	H9AXM1	---	Beta-lactamase (EC 3.5.2.6)	Acinetobacter baumannii
ARO:3001054	TEM-194	AFC75524.1	H9AXM0	---	Beta-lactamase (EC 3.5.2.6)	Acinetobacter baumannii
ARO:3001053	TEM-193	AFC75523.1	H9AXL9	---	Beta-lactamase (EC 3.5.2.6)	Acinetobacter baumannii
ARO:3001814	OXA-199	AFC95894.1	H9A1B4	blaOXA-199	Beta-lactamase (EC 3.5.2.6)	Shewanella xiamenensis
ARO:3003041	Streptococcus pneumoniae PBP1a conferring resistance to amoxicillin	AFC91828.1	H8ZYN4	pbp1a	PBP1A	Streptococcus pneumoniae
ARO:3003043	Streptococcus pneumoniae PBP2x conferring resistance to amoxicillin	AFC91898.1	H8ZYG5	pbp2x	PBP2X	Streptococcus pneumoniae
ARO:3001985	CTX-M-126	BAL72196.1	H7CHS5	blaCTX-M-126	Beta-lactamase (EC 3.5.2.6)	Escherichia coli
ARO:3001057	TEM-198	BAL68178.1	H7CHH5	blaTEM-198	Beta-lactamase (EC 3.5.2.6)	Klebsiella pneumoniae
ARO:3002759	QnrB44	AFA52645.1	H6WZT4	qnrB44	QnrB44 (Fragment)	Escherichia coli
ARO:3002760	QnrB45	AFA52644.1	H6WZT3	qnrB45	QnrB45 (Fragment)	Escherichia coli
ARO:3002758	QnrB43	AFA52643.1	H6WZT2	qnrB43	QnrB43 (Fragment)	Escherichia coli
ARO:3002355	NDM-4	AFB82585.1	H6WZS9	bla(NDM-4)	Metallo-beta-lactamase NDM-4 (NDM-4) (New Delhi metallo-beta-lactamase NDM-4)	Escherichia coli
ARO:3000510	mupB	AEY83581	H6WEN2	mupB	Isoleucine--tRNA ligase (EC 6.1.1.5) (Isoleucyl-tRNA synthetase) (IleRS)	Staphylococcus aureus
ARO:3000448	qepA	AEZ36150.1	H6WBK3	qepA3	Quinolone efflux pump	Enterobacter aerogenes (Aerobacter aerogenes)
ARO:3001982	CTX-M-123	AFA51701.1	H6V563	blaCTX-M-123	Beta-lactamase (EC 3.5.2.6)	Escherichia coli
ARO:3001981	CTX-M-122	AFA51700.1	H6V562	blaCTX-M-122	Beta-lactamase (EC 3.5.2.6)	Escherichia coli
ARO:3001980	CTX-M-121	AFA51699.1	H6V561	blaCTX-M-121	Beta-lactamase (EC 3.5.2.6)	Escherichia coli
ARO:3002081	CMY-68	AEZ49855.1	H6UZZ8	blaCMY-68	Beta-lactamase (EC 3.5.2.6)	Citrobacter freundii
ARO:3002079	CMY-66	AEZ49849.1	H6UZZ2	blaCMY-66	Beta-lactamase (EC 3.5.2.6)	Citrobacter freundii
ARO:3002302	VIM-32	AEZ49857.1	H6UQF5	blaVIM-32	VIM-32 metallo-beta-lactamase	Klebsiella oxytoca
ARO:3002349	GES-20	AEZ05108.1	H6U588	GES-20	Beta-lactamase (EC 3.5.2.6)	Escherichia coli
ARO:3002348	GES-19	AEZ05107.1	H6U587	GES-19	Beta-lactamase (EC 3.5.2.6)	Escherichia coli
ARO:3002587	AAC(6')-33	AEZ05106.1	H6U586	aac(6')-33	Aminoglycoside N-acetyltransferase AAC(6')-33 (Aminoglycoside acetyltransferase)	Escherichia coli
ARO:3003784	Mycobacterium tuberculosis intrinsic murA conferring resistance to fosfomycin	CCE36834.1	H6SBQ7	murA	murA	Mycobacterium tuberculosis UT205
ARO:3002100	CMY-87	BAL63057.1	H3K407	blaCMY-87	Beta-lactamase (EC 3.5.2.6) (Fragment)	Klebsiella pneumoniae
ARO:3003583	basS	AEX49906.1	H2FHA4	pmrB	PmrB (Two-component regulatory system sensor PmrB) (Two-component sensor histidine kinase)	Pseudomonas aeruginosa
ARO:3001184	SHV-142	AEX99752.1	H2ERK9	blaSHV-142	Beta-lactamase (EC 3.5.2.6)	Klebsiella pneumoniae
ARO:3002347	GES-18	AEX59144.1	H2ERK4	blaGES-18	Beta-lactamase (EC 3.5.2.6)	Pseudomonas aeruginosa
ARO:3003745	mefC	BAL43360	H1A9S5	mef(C)	Uncharacterized protein	Photobacterium damselae subsp. damselae (Listonella damsela)
ARO:3003742	mphG	BAL43359	H1A9S4	mph(G)	Uncharacterized protein	Photobacterium damselae subsp. damselae (Listonella damsela)
ARO:3003307	Salmonella serovars gyrB conferring resistance to fluoroquinolone	NP_462735.1	P0A2I3	gyrB	DNA gyrase subunit B (EC 5.99.1.3)	Salmonella typhimurium (strain LT2 / SGSC1412 / ATCC 700720)
ARO:3003459	Mycobacterium tuberculosis gyrB mutant conferring resistance to fluoroquinolone	CAA55486.1	A5TY73	gyrB	DNA gyrase subunit B (EC 5.99.1.3)	Mycobacterium tuberculosis (strain ATCC 25177 / H37Ra)
ARO:3003304	Mycobacterium leprae gyrB conferring resistance to fluoroquinolone	CAC29513.1	Q59533	gyrB	DNA gyrase subunit B (EC 5.99.1.3)	Mycobacterium leprae (strain TN)
ARO:3003303	Escherichia coli gyrB conferring resistance to aminocoumarin	BAE77595.1	P0AES6	gyrB	DNA gyrase subunit B (EC 5.99.1.3) (Type IIA topoisomerase subunit GyrB)	Escherichia coli (strain K12)
ARO:3003782	nybomycin resistant gyrA	CAG39034	Q6GKT9	gyrA	DNA gyrase subunit A (EC 5.99.1.3)	Staphylococcus aureus (strain MRSA252)
ARO:3003940	Shigella flexneri gyrA conferring resistance to fluoroquinolones	NP_708120.1	P0AES5	gyrA	DNA gyrase subunit A (EC 5.99.1.3)	Shigella flexneri
ARO:3003926	Salmonella enterica gyrA conferring resistance to fluoroquinolones	NP_461214.1	P37411	gyrA	DNA gyrase subunit A (EC 5.99.1.3)	Salmonella typhimurium (strain LT2 / SGSC1412 / ATCC 700720)
ARO:3003684	Pseudomonas aeruginosa gyrA conferring resistance to fluoroquinolones	NP_251858.1	P48372	gyrA	DNA gyrase subunit A (EC 5.99.1.3)	Pseudomonas aeruginosa (strain ATCC 15692 / DSM 22644 / CIP 104116 / JCM 14847 / LMG 12228 / 1C / PRS 101 / PAO1)
ARO:3003295	Mycobacterium tuberculosis gyrA conferring resistance to fluoroquinolones	CCP42728.1	P9WG47	gyrA	DNA gyrase subunit A (EC 5.99.1.3) (Type IIA topoisomerase subunit GyrA)	Mycobacterium tuberculosis (strain ATCC 25618 / H37Rv)
ARO:3003298	Mycobaterium leprae gyrA conferring resistance to fluoroquinolones	CAC29514.1	Q57532	gyrA	DNA gyrase subunit A (EC 5.99.1.3) [Cleaved into: Mle GyrA intein]	Mycobacterium leprae (strain TN)
ARO:3003294	Escherichia coli gyrA conferring resistance to fluoroquinolones	AAC75291.1	P0AES4	gyrA	DNA gyrase subunit A (EC 5.99.1.3)	Escherichia coli (strain K12)
ARO:3003789	Campylobacter jejuni gyrA conferring resistance to fluoroquinolones	YP_002344422.1	Q03470	gyrA	DNA gyrase subunit A (EC 5.99.1.3)	Campylobacter jejuni subsp. jejuni serotype O:2 (strain ATCC 700819 / NCTC 11168)
ARO:3003834	gadE	NP_417969.1	P63204	gadE	Transcriptional regulator GadE	Escherichia coli (strain K12)
ARO:3002356	NDM-6	AEX08599.1	G9JVE6	blaNDM-6	Metallo-beta-lactamase (NDM carbapenemase)	Escherichia coli
ARO:3001714	OXA-215	AEV91554.1	G9JKW1	blaOXA-215	Beta-lactamase (EC 3.5.2.6)	Acinetobacter haemolyticus
ARO:3001713	OXA-214	AEV91553.1	G9JKW0	blaOXA-214	Beta-lactamase (EC 3.5.2.6)	Acinetobacter haemolyticus
ARO:3001712	OXA-213	AEV91552.1	G9JKV9	blaOXA-213	Beta-lactamase OXA-213	Acinetobacter calcoaceticus
ARO:3001711	OXA-212	AEV91551.1	G9JKV8	blaOXA-212	Beta-lactamase OXA-212	Acinetobacter johnsonii
ARO:3001710	OXA-211	AEV91550.1	G9JKV7	blaOXA-211	Beta-lactamase OXA-211	Acinetobacter johnsonii
ARO:3002224	IMP-33	AEU17778.1	G9JKG5	blaIMP-33	Beta-lactamase (EC 3.5.2.6)	Pseudomonas aeruginosa
ARO:3001832	ACT-10	AEV91214.1	G9JKE9	ampC	Beta-lactamase (EC 3.5.2.6)	Serratia marcescens
ARO:3001977	CTX-M-117	AET99223.1	G9FYZ9	blaCTX-M-117	Beta-lactamase (EC 3.5.2.6)	Escherichia coli
ARO:3001046	TEM-186	AET99222.1	G9FYZ8	blaTEM-186	Beta-lactamase (EC 3.5.2.6)	Escherichia coli
ARO:3002076	CMY-63	AET07387.1	G9BNM1	CMY-63	Beta-lactamase (EC 3.5.2.6)	Citrobacter freundii
ARO:3001373	TEM-182	ADP20705.1	G9BBW8	blaTEM-182	Beta-lactamase (EC 3.5.2.6)	Haemophilus parainfluenzae
ARO:3001502	OXA-256	CCE94500.1	G9A0C1	blaOXA-10	Beta-lactamase (EC 3.5.2.6)	Enterobacter cloacae
ARO:3001503	OXA-258	CCE73593.2	G8ZKX1	bla-oxa258	Beta-lactamase (EC 3.5.2.6)	Achromobacter ruhlandii
ARO:3002757	QnrB42	AEQ94272.1	G8I093	qnrB42	QnrB42	Klebsiella pneumoniae
ARO:3001806	OXA-224	AEQ73521.1	G8HKR3	blaoxa-224	Beta-lactamase (EC 3.5.2.6)	Pseudomonas aeruginosa
ARO:3002300	VIM-30	AET05999.1	G8GER4	blaVIM-30	Metallo-beta-lactamase VIM-30	Pseudomonas aeruginosa
ARO:3002546	AAC(6')-Ib	AFJ11384.1	G8GB95	aacA4'-17	Aminoglycoside (6')-acetyltransferase (Aminoglycoside 6'-N-acetyl transferase type Ib) (Aminoglycoside 6'-N-acetyltransferase)	Klebsiella pneumoniae
ARO:3001500	OXA-251	AER57903.1	G8GB93	oxa-251	Beta-lactamase (EC 3.5.2.6)	Pseudomonas aeruginosa
ARO:3001777	OXA-347	AET35493.1	G8FXJ4	---	Beta-lactamase (EC 3.5.2.6)	uncultured bacterium
ARO:3001051	TEM-191	AEQ59621.1	G8ENQ4	blaTEM-1	Beta-lactamase (EC 3.5.2.6) (Fragment)	Escherichia coli
ARO:3001052	TEM-192	AEQ59620.1	G8ENQ3	blaTEM-1	Beta-lactamase (EC 3.5.2.6) (Fragment)	Klebsiella pneumoniae
ARO:3000854	SMB-1 beta-lactamase	BAL14456.1	G5ELM3	SMB-1	Metallo-beta-lactamase	Serratia marcescens
ARO:3001484	OXA-206	BAL15076.1	G5ELA7	blaOXA-206	Class D beta-lactamase OXA-206	Acinetobacter baumannii
ARO:3001493	OXA-225	AEP43731.1	G5DE28	blaOXA-225	Beta-lactamase OXA-225 (OXA-23 class D beta-lactamase)	Acinetobacter baumannii
ARO:3001784	OXA-181	AEP16366.1	G5CKK8	blaOXA-181	Beta-lactamase (EC 3.5.2.6)	Klebsiella pneumoniae
ARO:3002940	vanSN	AEP40504.1	G4XFL2	vanSN	VanSN	Enterococcus faecium (Streptococcus faecium)
ARO:3002929	vanRN	AEP40503.1	G4XFL1	vanRN	Response regulator (VanRN)	Enterococcus faecium (Streptococcus faecium)
ARO:3002975	vanTN	AEP40502.2	G4XFL0	vanTN	Alanine racemase (EC 5.1.1.1)	Enterococcus faecium (Streptococcus faecium)
ARO:3002969	vanXYN	AEP40501.1	G4XFK9	vanXYN	D,D-carboxypeptidase/D,D-dipeptidase (VanXYN)	Enterococcus faecium (Streptococcus faecium)
ARO:3002912	vanN	AEP40500.1	G4XFK8	vanN	D-alanine--D-alanine ligase (EC 6.3.2.4) (D-Ala-D-Ala ligase) (D-alanylalanine synthetase)	Enterococcus faecium (Streptococcus faecium)
ARO:3002219	IMP-28	AFG73659.1	G4WB26	blaIMP-28	Beta-lactamase (EC 3.5.2.6)	Klebsiella oxytoca
ARO:3002057	CMY-46	CBH19182.1	G4RJD5	blaCMY-46	Beta-lactamase (EC 3.5.2.6)	Escherichia coli
ARO:3002982	amrA	NP_250709.1	G3XD21	---	Resistance-Nodulation-Cell Division (RND) multidrug efflux membrane fusion protein	Pseudomonas aeruginosa (strain ATCC 15692 / DSM 22644 / CIP 104116 / JCM 14847 / LMG 12228 / 1C / PRS 101 / PAO1)
ARO:3002983	amrB	NP_250708.1	G3XCW2	---	Resistance-Nodulation-Cell Division (RND) multidrug efflux transporter	Pseudomonas aeruginosa (strain ATCC 15692 / DSM 22644 / CIP 104116 / JCM 14847 / LMG 12228 / 1C / PRS 101 / PAO1)
ARO:3003709	MexZ	NP_250710.1	G3XCU9	---	Probable transcriptional regulator	Pseudomonas aeruginosa (strain ATCC 15692 / DSM 22644 / CIP 104116 / JCM 14847 / LMG 12228 / 1C / PRS 101 / PAO1)
ARO:3003700	opmE	BAE06009.1	G3XCL7	opmE	Outer membrane protein OpmE (Putative outer membrane efflux protein)	Pseudomonas aeruginosa
ARO:3001489	OXA-217	AEO44980.1	G3M3N1	---	Beta-lactamase OXA-217	Acinetobacter baumannii
ARO:3002802	QnrVC5	AEM62764.1	G3LSF5	---	QnrVC-like protein	Vibrio fluvialis
ARO:3000467	NDM-5	AEN03071.1	G3K399	blaNDM-5	Beta-lactamase II (Class B carbapenemase NDM-5) (Class B metallo-beta-lactamase NDM-5) (Metallo-beta-lactamase NDM-5) (NDM-5) (NDM-5 metallo-beta-lactamase) (New Delhi Metallo carbapenemase protein) (New Delhi metallo beta lactamase 5) (New Delhi metallobetalactamase) (Subclass B1 metallo-beta-lactamase NDM-1)	Escherichia coli
ARO:3001205	determinant of bleomycin resistance	YP_007652797.1	G3GBT0	bleMBL	Ble (BleMBL) (Bleomycin resistance protein) (Bleomycin-resistance protein) (Putative uncharacterized protein)	Acinetobacter baumannii
ARO:3001483	OXA-205	AEO92079.1	G3G9W7	blaOXA-205	Beta-lactamase (EC 3.5.2.6)	Pseudomonas aeruginosa
ARO:3002075	CMY-62	AEM97674.1	G3F7H0	blaCMY-62	Beta-lactamase (EC 3.5.2.6)	Escherichia coli
ARO:3002074	CMY-61	AEM97673.1	G3F7G9	blaCMY-61	Beta-lactamase (EC 3.5.2.6)	Escherichia coli
ARO:3002073	CMY-60	AEM97672.1	G3F7G8	blaCMY-60	Beta-lactamase (EC 3.5.2.6)	Escherichia coli
ARO:3001969	CTX-M-109	AEM44654.1	G3EPW4	CTX-M-109	Beta-lactamase (EC 3.5.2.6) (Fragment)	Shigella sp. SH361
ARO:3001973	CTX-M-113	AEM44653.1	G3EPW3	CTX-M-113	Beta-lactamase (EC 3.5.2.6)	Shigella sp. SH284
ARO:3001972	CTX-M-112	AEM44652.1	G3EPW2	CTX-M-112	Beta-lactamase (EC 3.5.2.6)	Shigella sp. SH257
ARO:3001968	CTX-M-108	AEM44651.1	G3EPW1	CTX-M-108	Beta-lactamase (EC 3.5.2.6) (Fragment)	Shigella sp. SH223
ARO:3001967	CTX-M-107	AEM44650.1	G3EPW0	CTX-M-107	Beta-lactamase (EC 3.5.2.6) (Fragment)	Shigella sp. SH219
ARO:3001971	CTX-M-111	AEM44649.1	G3EPV9	CTX-M-111	Beta-lactamase (EC 3.5.2.6)	Shigella sp. SH202
ARO:3001970	CTX-M-110	AEM44648.1	G3EPV8	CTX-M-110	Beta-lactamase (EC 3.5.2.6) (Fragment)	Shigella sp. SH165
ARO:3001809	OXA-209	AEM66528.1	G3EN47	blaOXA-209	Beta-lactamase (EC 3.5.2.6)	Riemerella anatipestifer (Moraxella anatipestifer)
ARO:3002229	IMP-38	AEN75249.1	G3EJF2	blaIMP-38	Beta-lactamase (EC 3.5.2.6)	Klebsiella pneumoniae
ARO:3001050	TEM-190	AEL88240.1	G1JY45	tem-190	Beta-lactamase (EC 3.5.2.6)	Escherichia coli
ARO:3001049	TEM-189	AEL79515.1	G1FTI5	tem-189	Beta-lactamase (EC 3.5.2.6)	Escherichia coli
ARO:3001669	OXA-223	AEL88491.1	G1FNY4	blaOXA-223	Beta-lactamase OXA-223	Acinetobacter baumannii
ARO:3001668	OXA-219	AEL17179.1	G1FKB5	blaOXA-219	Beta-lactamase OXA-219	Acinetobacter baumannii
ARO:3001048	TEM-188	AEL17198.1	G1FK69	blaTEM-188	Beta-lactamase (EC 3.5.2.6)	Salmonella choleraesuis
ARO:3002753	QnrB38	AEL00461.1	G1FE80	qnrB38	Fluoroquinolone resistance protein (Pentapeptide repeat protein) (QnrB38)	Citrobacter freundii
ARO:3002752	QnrB37	AEL00459.1	G1FE78	qnrB37	Quinolone resistance protein QnrB37	Citrobacter freundii
ARO:3002751	QnrB36	AEL00458.1	G1FE77	qnrB36	Quinolone resistance protein QnrB36	Citrobacter freundii
ARO:3002750	QnrB35	AEL00456.1	G1FE75	qnrB35	Quinolone resistance protein QnrB35	Citrobacter freundii
ARO:3002749	QnrB34	AEL00452.1	G1FE71	qnrB34	Quinolone resistance protein QnrB34	Citrobacter werkmanii
ARO:3002748	QnrB33	AEL00451.1	G1FE70	qnrB33	Quinolone resistance protein QnrB33	Citrobacter braakii
ARO:3002747	QnrB32	AEL00450.1	G1FE69	qnrB32	Quinolone resistance protein QnrB32	Citrobacter freundii
ARO:3002756	QnrB41	AEL31272.1	G1FCF9	qnrB41	QnrB41 (Fragment)	Citrobacter freundii
ARO:3002755	QnrB40	AEL31271.1	G1FCF8	qnrB40	QnrB40 (Fragment)	Citrobacter braakii
ARO:3001182	SHV-140	AEK80394.1	G1EC65	blaSHV-140	Beta-lactamase (EC 3.5.2.6) (Fragment)	Klebsiella pneumoniae
ARO:3002163	FOX-9	AEK78851.1	G1CS20	bla(FOX-9)	Beta-lactamase (EC 3.5.2.6)	Klebsiella pneumoniae
ARO:3002138	DHA-5	AEL22919.1	G0ZGG7	blaDHA-5	Beta-lactamase (EC 3.5.2.6)	Morganella morganii (Proteus morganii)
ARO:3001766	OXA-192	ADZ54048.1	G0ZGG5	OXA-192	Class D beta-lactamase	Brachyspira pilosicoli
ARO:3001056	TEM-197	AEK48085.1	G0Z390	blaTEM-197	Beta-lactamase (EC 3.5.2.6)	Klebsiella pneumoniae
ARO:3001953	CTX-M-93	ADN26580.1	G0XMH2	blaCTX-M-93	Beta-lactamase (EC 3.5.2.6)	Escherichia coli
ARO:3001488	OXA-216	CCA94649.1	G0LXY6	oxa-216	Oxacillinase-216	Acinetobacter baumannii
ARO:3002833	vgaE	CBY88983.1	G0LNY2	vga(E)	ABC transporter	Staphylococcus aureus (strain MRSA ST398 / isolate S0385)
ARO:3000172	FosB	NP_831795.1	Q81EF2	fosB	Metallothiol transferase FosB (EC 2.5.1.-) (Fosfomycin resistance protein)	Bacillus cereus (strain ATCC 14579 / DSM 31 / JCM 2152 / NBRC 15305 / NCIMB 9373 / NRRL B-3711)
ARO:3000149	FosA	NP_249820.1	Q9I4K6	fosA	Glutathione transferase FosA (EC 2.5.1.18) (Fosfomycin resistance protein)	Pseudomonas aeruginosa (strain ATCC 15692 / DSM 22644 / CIP 104116 / JCM 14847 / LMG 12228 / 1C / PRS 101 / PAO1)
ARO:3004045	antibiotic resistant fabI	NP_415804.1	P0AEK4	fabI	Enoyl-[acyl-carrier-protein] reductase [NADH] FabI (ENR) (EC 1.3.1.9) (NADH-dependent enoyl-ACP reductase)	Escherichia coli (strain K12)
ARO:3004049	antibiotic resistant fabG	NP_415611.1	P0AEK2	fabG	3-oxoacyl-[acyl-carrier-protein] reductase FabG (EC 1.1.1.100) (3-ketoacyl-acyl carrier protein reductase) (Beta-Ketoacyl-acyl carrier protein reductase) (Beta-ketoacyl-ACP reductase)	Escherichia coli (strain K12)
ARO:3003463	Mycobacterium tuberculosis kasA mutant conferring resistance to isoniazid	CCP45025.1	P9WQD9	kasA	3-oxoacyl-[acyl-carrier-protein] synthase 1 (EC 2.3.1.41) (Beta-ketoacyl-ACP synthase 1) (KAS 1)	Mycobacterium tuberculosis (strain ATCC 25618 / H37Rv)
ARO:3000410	sul1	AEJ33969.1	F8UZ87	sul	Dihydropteroate synthase (DHPS) (EC 2.5.1.15) (Dihydropteroate pyrophosphorylase)	Vibrio fluvialis
ARO:3001976	CTX-M-116	AEI70324.1	F8UXB4	blaCTX-M-116	Beta-lactamase (EC 3.5.2.6)	Proteus mirabilis
ARO:3002298	VIM-28	AEI25539.1	F8UTU0	blaVIM-28	Metallo-beta-lactamase VIM-28	Pseudomonas aeruginosa
ARO:3002218	IMP-27	AEH41427.1	F8UQX1	---	Metallo-beta-lactamase IMP-27	Proteus mirabilis
ARO:3001109	SHV-52	AEJ08681.1	F8TCS6	blaSHV-52	Beta-lactamase (EC 3.5.2.6)	Klebsiella pneumoniae
ARO:3002369	PER-7	AEI54993.1	F8T7L4	blaPER-7	Beta-lactamase (EC 3.5.2.6)	Acinetobacter baumannii
ARO:3001826	ACT-9	AEI70575.1	F8SVM8	ampC	Beta-lactamase (EC 3.5.2.6)	Enterobacter agglomerans (Erwinia herbicola) (Pantoea agglomerans)
ARO:3001181	SHV-137	AEI83430.1	F8SQ10	---	Beta-lactamase (EC 3.5.2.6)	Klebsiella pneumoniae
ARO:3001486	OXA-208	CCA94644.1	F8KB04	oxa-208	Beta-lactamase oxa208 (Oxacillinase-208)	Acinetobacter baumannii
ARO:3001167	SHV-120	AEG79634.1	F6MFV3	blaSHV-120	Beta-lactamase (EC 3.5.2.6)	Escherichia coli
ARO:3001487	OXA-210	AEE61368.1	F6ME16	blaOXA-210	Beta-lactamase (EC 3.5.2.6)	Pseudomonas aeruginosa
ARO:3002297	VIM-27	ADX78234.1	F6L7B6	blaVIM-27	Metallo-beta-lactamase VIM-27	Klebsiella pneumoniae
ARO:3001783	OXA-163	ADY06444.1	F6KZJ2	blaOXA-163	Beta-lactamase (EC 3.5.2.6)	Enterobacter cloacae
ARO:3003878	ADC-56	WP_031973850.1	F6KX24	adc56	Beta-lactamase (EC 3.5.2.6)	Acinetobacter baumannii
ARO:3002794	QnrS5	AEG74319.1	F6KV46	---	Fluoroquinolone resistance protein	Aeromonas sobria
ARO:3002795	QnrS6	AEG74318.1	F6KV45	---	QnrS2 (Quinolone resistance protein)	Aeromonas hydrophila
ARO:3001047	TEM-187	ADM61585.1	F6K6C7	---	Beta-lactamase (EC 3.5.2.6)	Proteus mirabilis
ARO:3001805	OXA-198	ADT70779.1	F5B565	blaOXA-198	Beta-lactamase OXA-198	Pseudomonas aeruginosa
ARO:3002220	IMP-29	AFG25462.1	F5ANL2	blaIMP-29	Beta-lactamase (EC 3.5.2.6)	Pseudomonas aeruginosa
ARO:3001482	OXA-197	AEB98923.1	F5A8C3	blaOXA-197	Beta-lactamase OXA-197 (Fragment)	Acinetobacter nosocomialis
ARO:3001481	OXA-196	AEB98922.1	F5A8C2	blaOXA-196	Beta-lactamase OXA-196 (Fragment)	Acinetobacter nosocomialis
ARO:3001480	OXA-195	AEB98921.1	F5A8C1	blaOXA-195	Beta-lactamase OXA-195 (Fragment)	Acinetobacter nosocomialis
ARO:3001479	OXA-194	AEB98920.1	F5A8C0	blaOXA-194	Beta-lactamase OXA-194 (Fragment)	Acinetobacter nosocomialis
ARO:3001178	SHV-134	ADM25824.1	F4ZCJ5	blaSHV-134	Beta-lactamase (EC 3.5.2.6)	Klebsiella pneumoniae
ARO:3002053	CMY-42	ADM21467.1	F4YXC2	CMY-42	Beta-lactamase (EC 3.5.2.6)	Escherichia coli
ARO:3001209	mecC	WP_000725529.1	F4NA57	mecA	Alternate penicillin-binding protein (Beta-lactam-inducible penicillin-binding protein) (Penicillin binding protein 2a)	Staphylococcus aureus
ARO:3000590	NDM-2	AEA41876.1	F2YZ26	blaNDM-2	Metallo-beta-lactamase NDM-2 (NDM-2) (NDM-2 metallo-beta-lactamase) (New Delhi metallo-beta-lactamase)	Acinetobacter baumannii
ARO:3002346	GES-17	ADZ48685.1	F2YBS7	---	Beta-lactamase (EC 3.5.2.6)	Escherichia coli
ARO:3002323	KPC-13	AEA73284.1	F2X6V8	blaKPC-13	Beta-lactamase (EC 3.5.2.6)	Enterobacter cloacae
ARO:3003112	lsaC	AEA37904.1	F2WJM2	---	Lsa(C)	Streptococcus agalactiae
ARO:3001966	CTX-M-106	ADZ31262.1	F1DTB3	blaCTX-M-106	Beta-lactamase (EC 3.5.2.6) (Fragment)	Escherichia coli
ARO:3001965	CTX-M-105	ADY02554.1	F1DG66	blaCTX-M-105	Beta-lactamase (EC 3.5.2.6)	Escherichia coli
ARO:3001961	CTX-M-102	ADY02546.1	F1CLN0	blaCTX-M-98	Beta-lactamase (EC 3.5.2.6)	Escherichia coli
ARO:3001960	CTX-M-101	ADY02545.1	F1CLM9	blaCTX-M-101	Beta-lactamase (EC 3.5.2.6)	Escherichia coli
ARO:3002873	FosB3	ADX95999.1	F1C939	fosB	Metallothiol transferase FosB	Enterococcus faecium (Streptococcus faecium)
ARO:3002072	CMY-58	ADY19254.1	F1C3E3	blaCMY-58	Beta-lactamase (EC 3.5.2.6)	Escherichia coli
ARO:3000833	evgS	AAC75429.1	P30855	evgS	Sensor protein EvgS (EC 2.7.13.3)	Escherichia coli (strain K12)
ARO:3000832	evgA	NP_311275.1	P0ACZ6	evgA	DNA-binding transcriptional activator EvgA	Escherichia coli O157:H7
ARO:3003458	Mycobacterium tuberculosis ethA with mutation conferring resistance to ethionamide	AAK48336.1	P9WNF8	ethA	FAD-containing monooxygenase EthA (EC 1.14.13.-) (Baeyer-Villiger monooxygenase EtaA) (BVMO) (Prodrug activator EtaA)	Mycobacterium tuberculosis (strain CDC 1551 / Oshkosh)
ARO:3001304	ErmS	AAA26742.1	P45439	ermSF	rRNA adenine N-6-methyltransferase (EC 2.1.1.184) (Erythromycin resistance protein) (Macrolide-lincosamide-streptogramin B resistance protein)	Streptomyces fradiae (Streptomyces roseoflavus)
ARO:3000250	ErmC	AAA98296.1	P06572	ermM	rRNA adenine N-6-methyltransferase (EC 2.1.1.184) (Erythromycin resistance protein) (Macrolide-lincosamide-streptogramin B resistance protein)	Staphylococcus epidermidis
ARO:3000495	ErmD	AAA22597.1	Q04720	ermJ	rRNA adenine N-6-methyltransferase (EC 2.1.1.-) (Erythromycin resistance protein) (Macrolide-lincosamide-streptogramin B resistance protein)	Bacillus anthracis
ARO:3000522	ErmG	AAA22419.1	P06571	ermG	rRNA adenine N-6-methyltransferase (EC 2.1.1.-) (Erythromycin resistance protein) (Macrolide-lincosamide-streptogramin B resistance protein)	Lysinibacillus sphaericus (Bacillus sphaericus)
ARO:3000595	ErmT	AAA98096.1	Q00014	ermGT	rRNA adenine N-6-methyltransferase (EC 2.1.1.184) (Erythromycin resistance protein) (Macrolide-lincosamide-streptogramin B resistance protein)	Lactobacillus reuteri
ARO:3000498	ErmF	AAA88675.1	P10337	ermF	rRNA adenine N-6-methyltransferase (EC 2.1.1.-) (Erythromycin resistance protein) (Macrolide-lincosamide-streptogramin B resistance protein)	Bacteroides fragilis
ARO:3000326	ErmE	CAB60001.1	P07287	ermE	rRNA adenine N-6-methyltransferase (NMT) (EC 2.1.1.184) (Erythromycin resistance protein) (Macrolide-lincosamide-streptogramin B resistance protein)	Saccharopolyspora erythraea (strain ATCC 11635 / DSM 40517 / JCM 4748 / NBRC 13426 / NCIMB 8594 / NRRL 2338)
ARO:3000495	ErmD	AAA22599.1	Q03986	ermD	rRNA adenine N-6-methyltransferase (EC 2.1.1.-) (Erythromycin resistance protein) (Macrolide-lincosamide-streptogramin B resistance protein)	Bacillus licheniformis
ARO:3000250	ErmC	AAA20192.1	P13978	ermC	rRNA adenine N-6-methyltransferase (EC 2.1.1.184) (Erythromycin resistance protein) (Macrolide-lincosamide-streptogramin B resistance protein)	Staphylococcus aureus
ARO:3000250	ErmC	AAA98228.1	P13957	ermC	rRNA adenine N-6-methyltransferase (EC 2.1.1.184) (Erythromycin resistance protein) (Macrolide-lincosamide-streptogramin B resistance protein)	Staphylococcus aureus
ARO:3003576	PmrC	BAE78116.1	P30845	eptA	Phosphoethanolamine transferase EptA (EC 2.7.-.-) (Polymyxin resistance protein PmrC)	Escherichia coli (strain K12)
ARO:3000656	AcrS	AAC76296.1	P0ACT2	envR	Probable acrEF/envCD operon repressor	Escherichia coli (strain K12)
ARO:3000254	emrY	BAA11237.1	P52600	emrY	Probable multidrug resistance protein EmrY	Escherichia coli (strain K12)
ARO:3000206	emrK	BAA11236.1	P52599	emrK	Probable multidrug resistance protein EmrK	Escherichia coli (strain K12)
ARO:3004039	Escherichia coli emrE	CAA77936.1	P23895	emrE	Multidrug transporter EmrE (Efflux-multidrug resistance protein EmrE) (Ethidium resistance protein) (Methyl viologen resistance protein C)	Escherichia coli (strain K12)
ARO:3000074	emrB	AAC75733.1	P0AEJ0	emrB	Multidrug export protein EmrB	Escherichia coli (strain K12)
ARO:3000027	emrA	BAA16547.1	P27303	emrA	Multidrug export protein EmrA	Escherichia coli (strain K12)
ARO:3003455	Mycobacterium tuberculosis embR mutant conferring resistance to ethambutol	CCP44023.1	P9WGJ9	embR	Transcriptional regulatory protein EmbR	Mycobacterium tuberculosis (strain ATCC 25618 / H37Rv)
ARO:3003326	Mycobacterium tuberculosis embB mutations conferring resistance to ethambutol	CCP46624.1	P9WNL7	embB	Probable arabinosyltransferase B (EC 2.4.2.-)	Mycobacterium tuberculosis (strain ATCC 25618 / H37Rv)
ARO:3003465	Mycobacterium tuberculosis embB mutants conferring resistance to rifampicin	AAK48268.1	P9WNL6	embB	Probable arabinosyltransferase B (EC 2.4.2.-)	Mycobacterium tuberculosis (strain CDC 1551 / Oshkosh)
ARO:3003368	Escherichia coli EF-Tu mutants conferring resistance to kirromycin	AAA50993.1	P0CE47	tufA	Elongation factor Tu 1 (EF-Tu 1) (Bacteriophage Q beta RNA-directed RNA polymerase subunit III) (P-43)	Escherichia coli (strain K12)
ARO:3003370	Escherichia coli EF-Tu mutants conferring resistance to Enacyloxin IIa	NP_417798.1	P0CE47	tufA	Elongation factor Tu 1 (EF-Tu 1) (Bacteriophage Q beta RNA-directed RNA polymerase subunit III) (P-43)	Escherichia coli (strain K12)
ARO:3003359	Streptomyces cinnamoneus EF-Tu mutants conferring resistance to elfamycin	CAA67349.1	P95724	tuf	Elongation factor Tu (EF-Tu)	Streptomyces cinnamoneus (Streptoverticillium cinnamoneum)
ARO:3003361	Planobispora rosea EF-Tu mutants conferring resistance to inhibitor GE2270A	AAB39605.1	P72231	tuf	Elongation factor Tu (EF-Tu)	Planobispora rosea
ARO:3003369	Escherichia coli EF-Tu mutants conferring resistance to Pulvomycin	AAN82549.1	P0A6N2	tufA; tufB	Elongation factor Tu (EF-Tu) (P-43)	Escherichia coli O6:H1 (strain CFT073 / ATCC 700928 / UPEC)
ARO:3003735	Staphylococcus mutant fusA gene conferring resistance to fusidic acid	CAG39573	Q6GJC1	fusA	Elongation factor G (EF-G)	Staphylococcus aureus (strain MRSA252)
ARO:3001664	OXA-203	ADX07748.1	E9P784	blaOXA-203	Beta-lactamase OXA-203	Acinetobacter baumannii
ARO:3002077	CMY-64	ADW84690.1	E9NYS8	blaCMY-64	Beta-lactamase (EC 3.5.2.6)	Escherichia coli
ARO:3001667	OXA-202	ADX07747.1	E9NWK2	blaOXA-202	Beta-lactamase OXA-202	Acinetobacter baumannii
ARO:3001666	OXA-201	ADX07746.1	E9NWK1	blaOXA-201	Beta-lactamase OXA-201	Acinetobacter baumannii
ARO:3001665	OXA-200	ADX07745.1	E9NWK0	blaOXA-200	Beta-lactamase OXA-200	Acinetobacter baumannii
ARO:3002761	QnrB46	ADW54092.1	E9NSF4	qnrB53	QnrB53	Klebsiella pneumoniae
ARO:3002708	QnrA2	ADU33193.1	E7E021	qnrA2	QnrA2 (QnrB family quinolone resistance pentapeptide repeat protein)	Shewanella algae
ARO:3000813	MexS	ADT64081.1	E7DZ84	mexS	MexS (Oxidoreductase) (Quinone oxidoreductase 1) (EC 1.6.5.5)	Pseudomonas aeruginosa
ARO:3002067	CMY-56	ADT91162.1	E7DRN2	blaCMY-56	Beta-lactamase (EC 3.5.2.6)	Klebsiella pneumoniae
ARO:3002135	DHA-6	ADT91161.1	E7DRN1	blaDHA-6	Beta-lactamase (EC 3.5.2.6)	Escherichia coli
ARO:3001475	OXA-183	ADV41666.1	E7D4X6	oxa-183	Beta-lactamase (EC 3.5.2.6)	Pseudomonas aeruginosa
ARO:3001959	CTX-M-100	CBW46935.1	E7AXL5	blaCTX-M-100	Beta-lactamase (EC 3.5.2.6)	Escherichia coli
ARO:3002061	CMY-50	CBI75447.1	E6YFP2	blaCMY-50	Beta-lactamase (EC 3.5.2.6)	Escherichia coli
ARO:3001179	SHV-135	ADR66517.1	E5Q900	blaSHV-135	Beta-lactamase (EC 3.5.2.6)	Escherichia coli
ARO:3001045	TEM-183	ADR71220.1	E5LP65	TEM-183	Beta-lactamase (EC 3.5.2.6)	Klebsiella pneumoniae
ARO:3002136	DHA-7	ADQ00385.1	E5LMG2	blaDHA-7	Beta-lactamase (EC 3.5.2.6)	Enterobacter cloacae
ARO:3002646	APH(3')-IIc	ADQ43421.1	E5LCR3	aph(3')-IIc	Aminoglycoside 3'-phosphotransferase	Stenotrophomonas maltophilia (Pseudomonas maltophilia) (Xanthomonas maltophilia)
ARO:3002746	QnrB31	ADQ43424.1	E5LCN6	qnrB	QnrB31	Klebsiella pneumoniae
ARO:3002064	CMY-53	ADQ38362.1	E5L847	blaCMY-53	Beta-lactamase (EC 3.5.2.6)	Escherichia coli
ARO:3002295	VIM-25	ADO50679.1	E5G503	bla	Metallo-beta-lactamase VIM-25	Proteus mirabilis
ARO:3002296	VIM-26	CBY80143.1	E5BDC6	blaVIM-26	Metallo-beta-lactamase VIM-26 (VIM-26)	Klebsiella pneumoniae
ARO:3003106	Erm(42)	CBY77552.1	E5BDA4	erm(42)	Erm methyltransferase (rRNA methylase)	Pasteurella multocida
ARO:3002068	CMY-57	ADP37961.1	E3VW98	blaCMY-57	Beta-lactamase (EC 3.5.2.6)	Escherichia coli
ARO:3002322	KPC-12	ADZ75467.1	E3VVM7	blaKPC-12	Beta-lactamase (EC 3.5.2.6)	Klebsiella pneumoniae
ARO:3002059	CMY-48	ADP02979.1	E3UTA3	blaCMY-48	Beta-lactamase (EC 3.5.2.6)	Citrobacter freundii
ARO:3001955	CTX-M-95	CBL80615.1	E3PQJ5	bla	Beta-lactamase (EC 3.5.2.6)	Kluyvera ascorbata
ARO:3002740	QnrB25	ADN94685.1	E2JDQ8	qnrB25	QnrB25	Citrobacter freundii
ARO:3001957	CTX-M-98	ADO17948.1	E2IZP4	blaCTX-M-98	Beta-lactamase (EC 3.5.2.6)	Escherichia coli
ARO:3002161	FOX-8	ADK73994.1	E2IKQ7	blaFOX-8	Beta-lactamase (EC 3.5.2.6)	Escherichia coli
ARO:3002066	CMY-55	ADK55605.1	E2II01	---	Beta-lactamase (EC 3.5.2.6)	Escherichia coli
ARO:3002065	CMY-54	ADK55604.1	E2II00	---	Beta-lactamase (EC 3.5.2.6)	Escherichia coli
ARO:3001471	OXA-171	ADK35875.1	E2IGV3	---	Beta-lactamase OXA-171	Acinetobacter baumannii
ARO:3001470	OXA-170	ADK35874.1	E2IGV2	---	Beta-lactamase OXA-170	Acinetobacter baumannii
ARO:3001469	OXA-169	ADK35873.1	E2IGV1	---	Beta-lactamase OXA-169	Acinetobacter baumannii
ARO:3001468	OXA-168	ADK35872.1	E2IGV0	---	Beta-lactamase OXA-168	Acinetobacter baumannii
ARO:3001467	OXA-167	ADK35871.1	E2IGU9	---	Beta-lactamase OXA-167	Acinetobacter baumannii
ARO:3001466	OXA-166	ADK35870.1	E2IGU8	---	Beta-lactamase OXA-166	Acinetobacter baumannii
ARO:3001465	OXA-165	ADK35869.1	E2IGU7	---	Beta-lactamase OXA-165	Acinetobacter baumannii
ARO:3002269	IND-14	ADK38716.1	E2GLP7	blaIND-14	Class B carbapenemase IND-14	Chryseobacterium indologenes
ARO:3001662	OXA-164	ADK34116.1	E2EKF8	bla-OXA-164	Beta-lactamase (EC 3.5.2.6)	Acinetobacter baumannii
ARO:3003023	dfrB6	ADO00942.1	E2DND5	---	Dihydrofolate reductase B6	uncultured bacterium
ARO:3003924	Haemophilus parainfluenzae gyrA conferring resistance to fluoroquinolones	WP_014065640.1	E1W6N3	gyrA	DNA gyrase subunit A (EC 5.99.1.3)	Haemophilus parainfluenzae (strain T3T1)
ARO:3001695	OXA-134	ADM47435.1	E1B1P5	blaOXA-134a	Carbapenem-hydrolyzing class D beta-lactamase OXA-134a	Acinetobacter lwoffii
ARO:3001474	OXA-180	ADM26745.1	E1ABC3	blaOXA-180	Beta-lactamase OXA-180	Acinetobacter baumannii
ARO:3001473	OXA-179	ADM26744.1	E1ABC2	blaOXA-179	Beta-lactamase OXA-179	Acinetobacter baumannii
ARO:3000549	adeS	ADM92606.1	E1A0Z6	adeS	AdeS	Acinetobacter baumannii
ARO:3002745	QnrB30	ADM52194.1	E1A0X4	qnrB30	QnrB30	Citrobacter braakii
ARO:3002744	QnrB29	ADM52193.1	E1A0X3	qnrB29	QnrB29	Citrobacter freundii
ARO:3002743	QnrB28	ADM52188.1	E1A0W8	qnrB28	QnrB28	Citrobacter freundii
ARO:3002742	QnrB27	ADM52186.1	E1A0W6	qnrB27	QnrB27 (Quinolone resistance protein QnrB27)	Citrobacter braakii
ARO:3002405	OXY-2-10	ACV44456.1	E0WC50	blaOXY-2	Beta-lactamase (EC 3.5.2.6)	Klebsiella oxytoca
ARO:3002404	OXY-2-9	ACV44455.1	E0WC49	blaOXY-2	Beta-lactamase (EC 3.5.2.6)	Klebsiella oxytoca
ARO:3002069	CMY-59	BAJ17544.1	E0DAJ7	blaCMY-59	Beta-lactamase (EC 3.5.2.6) (Fragment)	Escherichia coli
ARO:3002294	VIM-24	ADL27533.1	E0AFT6	blaVIM-24	VIM-24	Klebsiella pneumoniae
ARO:3001958	CTX-M-99	ADL27532.1	E0AF02	blaCTX-M-99	Beta-lactamase (EC 3.5.2.6)	Klebsiella pneumoniae
ARO:3001709	OXA-182	ADK92148.1	E0ADX9	blaOXA-182	Beta-lactamase OXA-182 (OXA carbapenemase)	Acinetobacter baumannii
ARO:3002268	IND-12	ADK25051.1	E0A2V7	blaIND-12	Class B carbapenemase IND-12	Chryseobacterium indologenes
ARO:3002267	IND-11	ADK25050.1	E0A2V6	blaIND-11	Class B carbapenemase IND-11	Chryseobacterium indologenes
ARO:3003105	dfrA3	AAA25550.1	P12833	dhfrIII	Dihydrofolate reductase type 3 (EC 1.5.1.3) (Dihydrofolate reductase type III)	Salmonella typhimurium
ARO:3003012	dfrA13	CAA90683.1	Q59408	dfrA13	Dihydrofolate reductase type A13 (EC 1.5.1.3) (Dihydrofolate reductase type XIII) (DHFRXIII)	Escherichia coli
ARO:3002865	dfrC	AAO04716.1	P0C0P1	folA	Dihydrofolate reductase (DHFR) (EC 1.5.1.3)	Staphylococcus epidermidis (strain ATCC 12228)
ARO:3003389	Mycobacterium leprae folP with mutation conferring resistance to dapsone	CAC29732.1	P0C0X1	folP1	Dihydropteroate synthase (DHPS) (EC 2.5.1.15) (Dihydropteroate pyrophosphorylase)	Mycobacterium leprae (strain TN)
ARO:3003387	Streptococcus pyogenes folP with mutation conferring resistance to sulfonamides	AAL97684.1	Q8P152	folP	Dihydropteroate synthase (DHPS) (EC 2.5.1.15) (Dihydropteroate pyrophosphorylase)	Streptococcus pyogenes serotype M18 (strain MGAS8232)
ARO:3000903	TEM-33	ADL13944.1	D9Z4Z4	blaTEM-33	Beta-lactamase (EC 3.5.2.6)	Escherichia coli
ARO:3001042	TEM-177	CBJ06718.1	D9U8W0	blaTEM-177	Beta-lactamase (EC 3.5.2.6)	Proteus mirabilis
ARO:3002270	IND-15	BAJ14288.1	D9N4D1	blaIND-15	Metallo-beta-lactamase IND-15	Chryseobacterium indologenes
ARO:3002345	GES-16	ADJ94120.1	D9IR25	blaGES-16	Beta-lactamase (EC 3.5.2.6)	Serratia marcescens
ARO:3001954	CTX-M-94	ADK11041.1	D9IQH0	blaCTX-M-94	Beta-lactamase (EC 3.5.2.6)	Escherichia coli
ARO:3002800	QnrVC3	ADI81040.1	D9HP87	qnrVC3	QnrVC3	Vibrio cholerae non-O1/non-O139
ARO:3002629	ANT(6)-Ib	CBH51824.1	D8L9Z0	ant(6)-Ib	Streptomycin aminoglycoside adenylyltransferase ant(6)-Ib	Campylobacter fetus subsp. fetus
ARO:3000556	tet44	CBH51823.1	D8L9Y9	tet(44)	Ribosomal tetracycline resistance protein tet(44)	Campylobacter fetus subsp. fetus
ARO:3002872	FosA3	AEG78825.1	D7UQM0	fosA3	FosA3 (Fosfomycin resistance protein) (Fosfomycin resistance protein FosA) (Fosfomycin resistance protein FosA3) (Fosfomycin resistance protein, FosA3) (Glutathione transferase) (Glutathione transferase FosA)	Escherichia coli
ARO:3002874	FosC2	BAJ10053.1	D7UQL9	fosC2	Fosfomycin resistance protein FosC2	Escherichia coli
ARO:3002739	QnrB24	ADI46626.1	D7RYR7	qnrB24	QnrB24	Citrobacter freundii
ARO:3001472	OXA-178	ADI58622.1	D7RPF2	blaOXA-178	Carbapenem-hydrolyzing oxacillinase OXA-178	Acinetobacter baumannii
ARO:3001661	OXA-177	ADI58621.1	D7RPF1	blaOXA-177	Carbapenem-hydrolyzing oxacillinase OXA-177	Acinetobacter baumannii
ARO:3001660	OXA-176	ADI58620.1	D7RPF0	blaOXA-176	Carbapenem-hydrolyzing oxacillinase OXA-176	Acinetobacter baumannii
ARO:3001659	OXA-175	ADI58619.1	D7RPE9	blaOXA-175	Carbapenem-hydrolyzing oxacillinase OXA-175	Acinetobacter baumannii
ARO:3001658	OXA-174	ADI58618.1	D7RPE8	blaOXA-174	Carbapenem-hydrolyzing oxacillinase OXA-174	Acinetobacter baumannii
ARO:3001657	OXA-173	ADI58617.1	D7RPE7	blaOXA-173	Carbapenem-hydrolyzing oxacillinase OXA-173	Acinetobacter baumannii
ARO:3001656	OXA-172	ADI58616.1	D7RPE6	blaOXA-172	Carbapenem-hydrolyzing oxacillinase OXA-172	Acinetobacter baumannii
ARO:3002321	KPC-11	ADH95186.1	D7RIC6	blaKPC	Beta-lactamase (EC 3.5.2.6)	Klebsiella pneumoniae
ARO:3002058	CMY-47	ADH82410.1	D7RA71	blaCMY-47	Beta-lactamase (EC 3.5.2.6)	Citrobacter freundii
ARO:3000317	AAC(1)	ADH03009.1	D7R512	aac1	Aminoglycoside acetyltransferase	Acinetobacter baumannii
ARO:3002801	QnrVC4	ADI55014.1	D7P3C3	qnrVC4	QnrVC4 (Quinolone-resistance protein)	Aeromonas caviae (Aeromonas punctata)
ARO:3003046	qacA	BAJ09383.1	D6RVW4	qacA	Multidrug efflux pump	Staphylococcus aureus
ARO:3001776	OXA-162	ADG27454.1	D6QY24	blaOXA-162	Beta-lactamase (EC 3.5.2.6)	Klebsiella pneumoniae
ARO:3000573	tet(43)	ACS83748.1	D6MM08	tet43	Tet43	uncultured bacterium AOTet43
ARO:3001451	OXA-139	CAQ51348.1	D5SH02	bla-OXA-139	Beta-lactamase OXA-139 (EC 3.5.2.6)	Acinetobacter baumannii
ARO:3001175	SHV-128	ADE58494.1	D5LIR5	---	Beta-lactamase (EC 3.5.2.6)	Enterobacter cloacae
ARO:3001176	SHV-129	ADE08533.1	D5LGB4	blaSHV-129	Beta-lactamase (EC 3.5.2.6)	Escherichia coli
ARO:3003196	tet(45)	ADE08374.2	D5KLY6	tet45	Tetracycline resistance protein (Fragment)	Escherichia coli
ARO:3002368	PER-6	ADD80743.1	D5HSX5	blaPER-6	Beta-lactamase (EC 3.5.2.6)	Aeromonas allosaccharophila
ARO:3002869	dfrK	CBL80435.1	D5H463	dfrK	Dihydrofolate reductase (EC 1.5.1.3)	Staphylococcus aureus
ARO:3001177	SHV-133	BAI94487.1	D4QFM2	SHV-133	Beta-lactamase (EC 3.5.2.6)	Klebsiella pneumoniae
ARO:3003440	mecB	BAI83385.1	D4AH22	mecAm	MecA (Penicillin-binding protein 2' homolog MecAm)	Macrococcus caseolyticus
ARO:3000858	armA	ADC55560.1	D3Y5U0	armA	16S rRNA methylase	Pseudomonas aeruginosa
ARO:3002343	GES-14	ADC91899.1	D3X610	blaGES-14	Beta-lactamase (EC 3.5.2.6)	Acinetobacter baumannii
ARO:3001041	TEM-176	ADB90239.1	D3KDJ9	---	Beta-lactamase (EC 3.5.2.6)	Escherichia coli
ARO:3003907	cipA	WP_015735625.1	D3EIG6	cfr	Ribosomal RNA large subunit methyltransferase Cfr (EC 2.1.1.224) (23S rRNA (adenine(2503)-C(8))-methyltransferase) (23S rRNA m8A2503 methyltransferase)	Geobacillus sp. (strain Y412MC10)
ARO:3001663	OXA-160	ADB28891.1	D2XKK9	blaOXA-160	Class D beta-lactamase OXA-160	Acinetobacter baumannii
ARO:3002056	CMY-45	CBB16411.1	D2U4S1	blaCMY-45	Beta-lactamase (EC 3.5.2.6)	Proteus mirabilis
ARO:3002386	BEL-2	ACV69996.1	D2SSQ3	---	Beta-lactamase (EC 3.5.2.6)	Pseudomonas aeruginosa
ARO:3001963	CTX-M-104	ADY02555.1	D2KL97	blaCTX-M-104	Beta-lactamase (EC 3.5.2.6)	Escherichia coli
ARO:3002344	GES-15	ACZ98826.1	D2KFE7	blaGES-15	Beta-lactamase (EC 3.5.2.6)	Pseudomonas aeruginosa
ARO:3002266	IND-10	ADA13241.1	D2KCJ9	blaIND-10	Class B carbapenemase IND-10	Chryseobacterium indologenes
ARO:3002265	IND-9	ACZ65153.1	D2K7P0	blaIND-9	Metallo-beta-lactamase IND-9	Chryseobacterium indologenes
ARO:3002264	IND-8	ACZ65152.1	D2K7N9	blaIND-8	Metallo-beta-lactamase IND-8	Chryseobacterium indologenes
ARO:3001037	TEM-171	ADA79630.1	D2I9G2	---	Beta-lactamase (EC 3.5.2.6)	Escherichia coli
ARO:3002289	VIM-19	ACY29468.1	D2D9J0	blaVIM-19	Metallo-beta-lactamase VIM-19 (Metallo-betalactamase VIM-19)	Escherichia coli
ARO:3002342	GES-13	ACZ54536.1	D1MIX9	blaGES-13	Beta-lactamase (EC 3.5.2.6)	Pseudomonas aeruginosa
ARO:3001952	CTX-M-92	ACY74743.1	D1MAH3	---	Beta-lactamase (EC 3.5.2.6)	Escherichia coli
ARO:3001169	SHV-122	ACY70943.1	D1KRK6	blaSHV-122	Beta-lactamase (EC 3.5.2.6) (Fragment)	Escherichia coli
ARO:3002217	IMP-26	ACY01749.1	D0V558	blaIMP-26	Beta-lactamase (EC 3.5.2.6)	Pseudomonas aeruginosa
ARO:3001860	IMI-3	ACX71212.1	D0V475	blaIMI-3	Beta-lactamase (EC 3.5.2.6)	Enterobacter cloacae
ARO:3001654	OXA-143	ACX70402.1	D0UHC8	bla-OXA-143	Beta-lactamase OXA-143	Acinetobacter baumannii
ARO:3002845	vatH	ACX92987.1	D0U1S8	vatG	Streptogramin A acetyltransferase	Enterococcus faecium (Streptococcus faecium)
ARO:3002832	vgaD	ACX92986.2	D0U1S7	vgaD	ABC transporter	Enterococcus faecium (Streptococcus faecium)
ARO:3002480	OXA-144	ACY56711.1	D0QX42	bla-OXA-144	Beta-lactamase (EC 3.5.2.6) (Beta-lactamase OXA-144)	Acinetobacter baumannii
ARO:3001951	CTX-M-91	ACX34099.1	D0ES28	---	Beta-lactamase (EC 3.5.2.6)	Proteus mirabilis
ARO:3001455	OXA-150	ACX31142.1	D0ELI0	---	Beta-lactamase OXA-150	Acinetobacter baumannii
ARO:3001454	OXA-149	ACX31141.1	D0ELH9	---	Beta-lactamase OXA-149	Acinetobacter baumannii
ARO:3001453	OXA-148	ACX31140.1	D0ELH8	---	Beta-lactamase OXA-148	Acinetobacter baumannii
ARO:3004089	ANT(3'')-IIa	EEX02086	D0CEM6	---	Nucleotidyltransferase domain protein	Acinetobacter baumannii (strain ATCC 19606 / DSM 30007 / CIP 70.34 / JCM 6841 / NBRC 109757 / NCIMB 12457 / NCTC 12156 / 81)
ARO:3000518	CRP	BAE77933.1	P0ACJ8	crp	cAMP-activated global transcriptional regulator CRP (Catabolite activator protein) (CAP) (Catabolite gene activator) (cAMP receptor protein) (CRP) (cAMP regulatory protein)	Escherichia coli (strain K12)
ARO:3000830	cpxA	NP_312864.1	P0AE84	cpxA	Sensor protein CpxA (EC 2.7.13.3)	Escherichia coli O157:H7
ARO:3002690	Streptomyces lividans cml	CAA42594.1	P31141	cmlR	Chloramphenicol resistance protein	Streptomyces lividans
ARO:3003441	cfrA	CAL64019.1	A2AXI2	cfr	Ribosomal RNA large subunit methyltransferase Cfr (EC 2.1.1.224) (23S rRNA (adenine(2503)-C(8))-methyltransferase) (23S rRNA m8A2503 methyltransferase)	Staphylococcus warneri
ARO:3002670	cat	AAA16529.1	P36883	---	Chloramphenicol acetyltransferase (CAT) (EC 2.3.1.28)	Staphylococcus aureus
ARO:3002670	cat	CAA43218.1	P36882	cat	Chloramphenicol acetyltransferase (CAT) (EC 2.3.1.28)	Staphylococcus aureus
ARO:3002679	catB7	NP_249397.1	P26841	cat	Chloramphenicol acetyltransferase (EC 2.3.1.28) (Xenobiotic acetyltransferase) (XAT)	Pseudomonas aeruginosa (strain ATCC 15692 / DSM 22644 / CIP 104116 / JCM 14847 / LMG 12228 / 1C / PRS 101 / PAO1)
ARO:3002670	cat	AAA22081.1	P23364	cat	Chloramphenicol acetyltransferase (EC 2.3.1.28)	Agrobacterium fabrum (strain C58 / ATCC 33970) (Agrobacterium tumefaciens (strain C58))
ARO:3002685	catIII	CAA30695.1	P00484	cat3	Chloramphenicol acetyltransferase 3 (EC 2.3.1.28) (Chloramphenicol acetyltransferase III) (CAT-III)	Escherichia coli
ARO:3002684	catII	CAA37806.1	P22616	cat-IIH	Chloramphenicol acetyltransferase 2 (EC 2.3.1.28) (Chloramphenicol acetyltransferase II) (CAT-II)	Haemophilus influenzae
ARO:3002686	catP	AAB51421.1	P26826	catP	Chloramphenicol acetyltransferase (CAT) (EC 2.3.1.28)	Clostridium perfringens
ARO:3002687	catQ	AAA23215.1	P26825	catQ	Chloramphenicol acetyltransferase (CAT) (EC 2.3.1.28)	Clostridium perfringens
ARO:3002670	cat	AAB23649.1	P49417	cat	Chloramphenicol acetyltransferase (CAT) (EC 2.3.1.28)	Vibrio anguillarum (Listonella anguillarum)
ARO:3002670	cat	AAA26615.1	P25309	cat	Chloramphenicol acetyltransferase (CAT) (EC 2.3.1.28)	Staphylococcus intermedius
ARO:3002670	cat	AAA25655.1	P07641	cat	Chloramphenicol acetyltransferase (CAT) (EC 2.3.1.28)	Proteus mirabilis
ARO:3002683	catI	CAA23899.1	P62577	cat	Chloramphenicol acetyltransferase (CAT) (EC 2.3.1.28)	Escherichia coli
ARO:3002674	catB	AAA73865.1	Q02736	catB	Chloramphenicol acetyltransferase (CAT) (EC 2.3.1.28)	Clostridium butyricum
ARO:3002670	cat	AAA23018.1	P22782	---	Chloramphenicol acetyltransferase (CAT) (EC 2.3.1.28)	Campylobacter coli
ARO:3002672	cat86	AAA22289.1	P00487	cat86	Chloramphenicol acetyltransferase (CAT) (EC 2.3.1.28) (Cat-86)	Bacillus pumilus (Bacillus mesentericus)
ARO:3002823	ErmH	AAC32026.1	P13079	carB	rRNA methyltransferase (EC 2.1.1.-) (Carbomycin-resistance protein)	Streptomyces thermotolerans
ARO:3003788	Bacillus subtilis pgsA mutations conferring resistance to daptomycin	BAA85265	P96738	capA	PGA biosynthesis protein CapA	Bacillus subtilis (strain 168)
ARO:3002713	QnrA7	ACV83303.2	C9E6H4	qnrA7	QnrA7	Shewanella algae
ARO:3001168	SHV-121	AEI83429.1	C9DT08	blaSHV-121	Beta-lactamase (EC 3.5.2.6)	Klebsiella pneumoniae
ARO:3002341	GES-12	CBG22732.1	C8ZLL4	BlaGES-12	Beta-lactamase (EC 3.5.2.6)	Acinetobacter baumannii
ARO:3001932	CTX-M-71	ACV92002.1	C8YUV9	blaCTX-M-71	Beta-lactamase (EC 3.5.2.6)	Klebsiella pneumoniae
ARO:3002290	VIM-20	ACV13198.1	C8CK73	blaVIM-20	Class B carbapenemase	Pseudomonas aeruginosa
ARO:3002060	CMY-49	ACV32310.1	C8CHH7	cmy-49	Beta-lactamase (EC 3.5.2.6)	Citrobacter freundii
ARO:3001174	SHV-127	ACV32637.1	C8CE60	---	Beta-lactamase (EC 3.5.2.6) (Fragment)	Klebsiella pneumoniae
ARO:3001173	SHV-126	ACV32636.1	C8CE59	---	Beta-lactamase (EC 3.5.2.6) (Fragment)	Escherichia coli
ARO:3001172	SHV-125	ACV32635.1	C8CE58	---	Beta-lactamase (EC 3.5.2.6) (Fragment)	Klebsiella pneumoniae
ARO:3001171	SHV-124	ACV32634.1	C8CE57	---	Beta-lactamase (EC 3.5.2.6) (Fragment)	Klebsiella pneumoniae
ARO:3001170	SHV-123	ACV32633.1	C8CE56	---	Beta-lactamase (EC 3.5.2.6) (Fragment)	Klebsiella pneumoniae
ARO:3002999	CblA-1	ACT97415.1	C8C0I2	---	Beta-lactamase (EC 3.5.2.6)	mixed culture bacterium AX_gF3SD01_15
ARO:3003097	CfxA6	ACT97371.1	C8C0D8	---	CfxA6 beta-lactamase	uncultured organism
ARO:3001974	CTX-M-114	ACU00153.1	C7FE03	blaCTX-M-114	Beta-lactamase (EC 3.5.2.6)	Providencia rettgeri
ARO:3002086	CMY-73	ACU00152.1	C7FE02	blaCMY-73	Beta-lactamase (EC 3.5.2.6)	Citrobacter freundii
ARO:3002293	VIM-23	ACT33323.1	C7E2Z7	blaVIM-23	Metallo-beta-lactamase VIM-23	Enterobacter cloacae
ARO:3002387	BEL-3	ACT09140.1	C6KFE1	blaBEL-3	BEL-3	Pseudomonas aeruginosa
ARO:3001799	OXA-161	ACT09125.1	C6KFD9	blaOXA-161	Beta-lactamase (EC 3.5.2.6)	Pseudomonas aeruginosa
ARO:3002189	MOX-7	ACS44785.1	C6K2V7	blaMOX-7	AmpC beta-lactamase MOX-7	Aeromonas caviae (Aeromonas punctata)
ARO:3002185	MOX-6	ACS44784.1	C6K2V6	blaMOX-6	AmpC beta-lactamase MOX-6	Aeromonas caviae (Aeromonas punctata)
ARO:3002188	MOX-5	ACS44783.1	C6K2V5	blaMOX-5	AmpC beta-lactamase MOX-5	Aeromonas caviae (Aeromonas punctata)
ARO:3002320	KPC-10	ACS35345.1	C6JUP9	KPC-10	Beta-lactamase KPC-10	Acinetobacter baumannii
ARO:3002738	QnrB23	ACS71747.1	C6GJP9	qnrB23	QnrB23	Citrobacter freundii
ARO:3002737	QnrB22	ACS71746.1	C6GJP8	qnrB22	QnrB22	Citrobacter werkmanii
ARO:3002339	GES-10	ACS73598.1	C6GC02	---	Beta-lactamase GES10	uncultured bacterium
ARO:3003022	dfrB3	ACR57831.1	C5MRP4	dfrB3	Dihydrofolate reductase (EC 1.5.1.3)	Klebsiella oxytoca
ARO:3001936	CTX-M-75	ACS32294.1	C5MRF6	blaCTX-M-75	Extended spectrum beta-lactamase CTX-M-75 (Fragment)	Providencia stuartii
ARO:3001935	CTX-M-74	ACS32293.1	C5MRF5	blaCTX-M-74	Extended spectrum beta-lactamase CTX-M-74 (Fragment)	Enterobacter cloacae
ARO:3002852	arr-7	CAZ48628.1	C5J9N8	arr-7	ADP-ribosyltransferase	Pseudomonas aeruginosa
ARO:3001949	CTX-M-89	ACR56321.1	C5IXH9	---	Beta-lactamase (EC 3.5.2.6)	Proteus mirabilis
ARO:3002340	GES-11	ACS44714.1	C5HUY1	blaGES-11	Beta-lactamase (EC 3.5.2.6)	Acinetobacter baumannii
ARO:3002574	AAC(6')-Iaf	BAH66386.1	C4TGI5	aac(6')-Iaf	Aminoglycoside 6'-N-acetyltransferase	Pseudomonas aeruginosa
ARO:3001034	TEM-168	ACR22829.1	C4PE86	blaTEM-168	Beta-lactamase (EC 3.5.2.6)	Escherichia coli
ARO:3001950	CTX-M-90	ACQ99521.1	C4P9N4	blaCTX-M-90	Beta-lactamase (EC 3.5.2.6)	Salmonella sp. YLD3
ARO:3002509	PDC-10	ACQ82815.1	C4NY34	---	Beta-lactamase (EC 3.5.2.6)	Pseudomonas aeruginosa
ARO:3002508	PDC-9	ACQ82814.1	C4NY33	---	Beta-lactamase (EC 3.5.2.6)	Pseudomonas aeruginosa
ARO:3002507	PDC-8	ACQ82813.1	C4NY32	---	Beta-lactamase (EC 3.5.2.6)	Pseudomonas aeruginosa
ARO:3002506	PDC-7	ACQ82812.1	C4NY31	---	Beta-lactamase (EC 3.5.2.6)	Pseudomonas aeruginosa
ARO:3002505	PDC-6	ACQ82811.1	C4NY30	---	Beta-lactamase (EC 3.5.2.6)	Pseudomonas aeruginosa
ARO:3002501	PDC-4	ACQ82809.1	C4NY28	---	Beta-lactamase (EC 3.5.2.6)	Pseudomonas aeruginosa
ARO:3002498	PDC-2	ACQ82806.1	C4NY25	---	Beta-lactamase (EC 3.5.2.6)	Pseudomonas aeruginosa
ARO:3001035	TEM-169	ACP18864.1	C3VMN0	TEM	Beta-lactamase (EC 3.5.2.6) (Fragment)	Salmonella infantis
ARO:3001948	CTX-M-88	ACP18863.1	C3VMM9	blaCTX-M	Beta-lactamase (EC 3.5.2.6) (Fragment)	Salmonella infantis
ARO:3001801	OXA-147	ACO72579.1	C3V8R2	bla	Beta-lactamase (EC 3.5.2.6)	Pseudomonas aeruginosa
ARO:3002934	vanSD	ACM47284	C3TSE3	vanSD	Histidine protein kinase VanSD	Enterococcus faecium (Streptococcus faecium)
ARO:3003072	Bacillus Cluster A intrinsic mph	EEL41021.1	C2V9N3	---	Macrolide 2'-phosphotransferase II	Bacillus cereus Rock3-29
ARO:3003931	Capnocytophaga gingivalis gyrA conferring resistance to fluoroquinolones	EEK14408.1	C2M5D1	gyrA	DNA gyrase subunit A (EC 5.99.1.3)	Capnocytophaga gingivalis
ARO:3002376	VEB-7	ACO56763.1	C1KGB9	---	Beta-lactamase (EC 3.5.2.6)	Acinetobacter baumannii
ARO:3001020	TEM-154	ACO07310.1	C1KAC8	blaTEM-154	Beta-lactamase (EC 3.5.2.6)	Escherichia coli
ARO:3002676	catB3	YP_006965431.1	C1IUN4	catB3	CatB3 (CatB3 chloramphenicol acetyltransferase) (Chloramphenicol acetyltransferase) (EC 2.3.1.28)	Enterobacter cloacae
ARO:3001804	OXA-145	ACN85419.1	C0LZL5	oxa145	Beta-lactamase (EC 3.5.2.6)	Pseudomonas aeruginosa
ARO:3000237	TolC	ACN32294.1	C0LTR9	tolC	Outer membrane channel (Outer membrane channel TolC) (TolC)	Escherichia coli
ARO:3002432	OKP-A-15	ACN65419.1	C0LSK3	---	Beta-lactamase (EC 3.5.2.6)	Klebsiella pneumoniae
ARO:3002433	OKP-A-16	ACN65418.1	C0LSK2	---	Beta-lactamase (EC 3.5.2.6)	Klebsiella pneumoniae
ARO:3003876	ADC-44	WP_063857804.1	C0LMI7	adc-44	Beta-lactamase (EC 3.5.2.6)	Acinetobacter pittii (Acinetobacter genomosp. 3)
ARO:3003873	ADC-42	WP_063857803.1	C0LMI5	adc-42	Beta-lactamase (EC 3.5.2.6)	Acinetobacter pittii (Acinetobacter genomosp. 3)
ARO:3003872	ADC-41	WP_063857802.1	C0LMI4	adc-41	Beta-lactamase (EC 3.5.2.6)	Acinetobacter pittii (Acinetobacter genomosp. 3)
ARO:3002367	PER-5	ACN22483.1	C0KTK2	blaPER-5	Beta-lactamase (EC 3.5.2.6) (Fragment)	Providencia rettgeri
ARO:3002319	KPC-9	ACM91559.1	C0KTA5	blaKPC	Beta-lactamase (EC 3.5.2.6) (Fragment)	Escherichia coli
ARO:3002787	QnrC	ACK75961.1	C0J7J6	qnrC	QnrC	Proteus mirabilis
ARO:3003006	blt	AAC36944.1	P39843	blt	Multidrug resistance protein 2 (Multidrug-efflux transporter 2)	Bacillus subtilis (strain 168)
ARO:3003007	bmr	AAA22277.1	P33449	bmr	Multidrug resistance protein 1 (Multidrug-efflux transporter 1)	Bacillus subtilis (strain 168)
ARO:3001907	CTX-M-45	BAA28282.1	O69395	bla	Beta-lactamase Toho-2 (EC 3.5.2.6)	Escherichia coli
ARO:3001906	CTX-M-44	BAA07082.1	Q47066	bla	Beta-lactamase Toho-1 (EC 3.5.2.6)	Escherichia coli
ARO:3001402	OXA-7	CAA53242.1	P35695	bla	Beta-lactamase OXA-7 (EC 3.5.2.6)	Escherichia coli
ARO:3001400	OXA-5	CAA41211.1	Q00982	bla	Beta-lactamase OXA-5 (EC 3.5.2.6)	Pseudomonas aeruginosa
ARO:3001398	OXA-3	AAC41449.1	Q51429	bla	Beta-lactamase OXA-3 (EC 3.5.2.6) (Penicillinase)	Pseudomonas aeruginosa
ARO:3001397	OXA-2	AAB59082.1	P0A1V9	bla	Beta-lactamase OXA-2 (EC 3.5.2.6) (Penicillinase)	Escherichia coli
ARO:3001414	OXA-19	AAD02245.1	Q9R976	bla	Beta-lactamase OXA-19 (EC 3.5.2.6) (Penicillinase)	Pseudomonas aeruginosa
ARO:3001413	OXA-18	AAB58555.1	O07293	bla	Beta-lactamase OXA-18 (EC 3.5.2.6) (Penicillinase)	Pseudomonas aeruginosa
ARO:3001410	OXA-15	AAB05874.1	Q51574	bla	Beta-lactamase OXA-15 (EC 3.5.2.6)	Pseudomonas aeruginosa
ARO:3001406	OXA-11	CAA80304.1	Q06778	bla	Beta-lactamase OXA-11 (EC 3.5.2.6)	Pseudomonas aeruginosa
ARO:3002997	LCR-1	CAA40146.1	Q00983	lcr1	Beta-lactamase LCR-1 (EC 3.5.2.6)	Pseudomonas aeruginosa
ARO:3002363	PER-1	CAA79968.1	P37321	per1	Extended-spectrum beta-lactamase PER-1 (EC 3.5.2.6)	Pseudomonas aeruginosa
ARO:3002245	CARB-6	AAD19217.1	P81781	carB6	Beta-lactamase CARB-6 (EC 3.5.2.6) (Carbenicillinase 6)	Vibrio cholerae
ARO:3001870	CTX-M-7	CAA06312.1	O65976	bla	Beta-lactamase CTX-M-6 (EC 3.5.2.6) (Cefotaximase 6)	Salmonella typhimurium
ARO:3001869	CTX-M-6	CAA06311.1	O65975	bla	Beta-lactamase CTX-M-5 (EC 3.5.2.6) (Cefotaximase 5)	Salmonella typhimurium
ARO:3001867	CTX-M-4	CAA74573.1	O33807	bla	Beta-lactamase CTX-M-4 (EC 3.5.2.6) (Cefotaximase 4)	Salmonella typhimurium
ARO:3002243	CARB-4	AAC09012.1	Q51355	carB4	Beta-lactamase CARB-4 (EC 3.5.2.6) (Carbenicillinase 4)	Pseudomonas aeruginosa
ARO:3002242	CARB-3	AAB19430.2	P37322	carB3	Beta-lactamase CARB-3 (EC 3.5.2.6) (Carbenicillinase 3)	Pseudomonas aeruginosa
ARO:3001864	CTX-M-1	CAA63262.1	P28585	bla	Beta-lactamase CTX-M-1 (EC 3.5.2.6) (Beta-lactamase MEN-1) (Cefotaximase 1)	Escherichia coli
ARO:3000873	TEM-1	CAD09800.1	P62594	bla	Beta-lactamase TEM (EC 3.5.2.6) (Penicillinase)	Salmonella typhi
ARO:3000884	TEM-12	AAA25053.1	Q48406	blaT-12b	Beta-lactamase TEM-12 (EC 3.5.2.6)	Klebsiella oxytoca
ARO:3000887	TEM-16	CAA46346.1	P62593	bla	Beta-lactamase TEM (EC 3.5.2.6) (IRT-4) (Penicillinase) (TEM-1) (TEM-16/CAZ-7) (TEM-2) (TEM-24/CAZ-6) (TEM-3) (TEM-4) (TEM-5) (TEM-6) (TEM-8/CAZ-2)	Escherichia coli
ARO:3000894	TEM-24	CAA46345.1	P62593	blaT-3	Beta-lactamase TEM (EC 3.5.2.6) (IRT-4) (Penicillinase) (TEM-1) (TEM-16/CAZ-7) (TEM-2) (TEM-24/CAZ-6) (TEM-3) (TEM-4) (TEM-5) (TEM-6) (TEM-8/CAZ-2)	Escherichia coli
ARO:3000875	TEM-3	CAA45828.1	P62593	blaT-4	Beta-lactamase TEM (EC 3.5.2.6) (IRT-4) (Penicillinase) (TEM-1) (TEM-16/CAZ-7) (TEM-2) (TEM-24/CAZ-6) (TEM-3) (TEM-4) (TEM-5) (TEM-6) (TEM-8/CAZ-2)	Escherichia coli
ARO:3000878	TEM-6	CAA41038.1	P62593	blaT-5	Beta-lactamase TEM (EC 3.5.2.6) (IRT-4) (Penicillinase) (TEM-1) (TEM-16/CAZ-7) (TEM-2) (TEM-24/CAZ-6) (TEM-3) (TEM-4) (TEM-5) (TEM-6) (TEM-8/CAZ-2)	Escherichia coli
ARO:3000880	TEM-8	CAA46344.1	P62593	blaT-6	Beta-lactamase TEM (EC 3.5.2.6) (IRT-4) (Penicillinase) (TEM-1) (TEM-16/CAZ-7) (TEM-2) (TEM-24/CAZ-6) (TEM-3) (TEM-4) (TEM-5) (TEM-6) (TEM-8/CAZ-2)	Escherichia coli
ARO:3000589	NDM-1	CAZ39946.1	C7C422	blaNDM-1	Metallo-beta-lactamase type 2 (EC 3.5.2.6) (B2 metallo-beta-lactamase) (Beta-lactamase type II) (Metallo-beta-lactamase NDM-1) (Metallo-beta-lactamase type II) (New Delhi metallo-beta-lactamase-1) (NDM-1)	Klebsiella pneumoniae
ARO:3002379	SME-1	CAA82281.1	P52682	smeA	Carbapenem-hydrolyzing beta-lactamase Sme-1 (EC 3.5.2.6)	Serratia marcescens
ARO:3003589	NmcA beta-lactamase	CAA79967.1	P52663	nmcA	Imipenem-hydrolyzing beta-lactamase (EC 3.5.2.6) (Carbapenemase) (NMC-A)	Enterobacter cloacae
ARO:3003562	TLE beta-lactamase	AAA19882.1	Q59517	blaF	Beta-lactamase (EC 3.5.2.6) (Penicillinase)	Mycobacterium fortuitum
ARO:3003564	EXO beta-lactamase	AAA26775.1	P14559	---	Beta-lactamase (EC 3.5.2.6) (Penicillinase)	Streptomyces albus G
ARO:3003563	NPS beta-lactamase	CAA33795.1	P14171	---	Beta-lactamase (EC 3.5.2.6) (Penicillinase)	Rhodobacter capsulatus (Rhodopseudomonas capsulata)
ARO:3002454	LEN-1	CAA28198.1	P05192	---	Beta-lactamase (EC 3.5.2.6) (Penicillinase)	Klebsiella pneumoniae
ARO:3003001	CfxA	AAB17891.1	P30899	cfxA	Beta-lactamase (EC 3.5.2.6)	Bacteroides vulgatus
ARO:3002877	BcI	CAA29819.1	P00809	blaY	Beta-lactamase 1 (EC 3.5.2.6) (Beta-lactamase I) (Penicillinase)	Bacillus cereus
ARO:3000578	CcrA beta-lactamase	AAA22904.1	P25910	ccrA	Metallo-beta-lactamase type 2 (EC 3.5.2.6) (B2 metallo-beta-lactamase) (Beta-lactamase II) (Carbapenem and cephamycin resistance) (CCRA) (Cephalosporinase) (Imipenem-cefoxitin hydrolyzing enzyme) (Metallo-beta-lactamase type II) (Penicillinase) (Zinc-requiring beta-lactamase)	Bacteroides fragilis
ARO:3002878	BcII	AAA22562.1	P14488	---	Metallo-beta-lactamase type 2 (EC 3.5.2.6) (B2 metallo-beta-lactamase) (Beta-lactamase II) (Cephalosporinase) (Metallo-beta-lactamase type II) (Metallothioprotein beta-lactamase II) (Penicillinase) (Zinc-requiring beta-lactamase II)	Bacillus cereus
ARO:3003103	cphA7	CAA40386.1	P26918	cphA	Metallo-beta-lactamase type 2 (EC 3.5.2.6) (B2 metallo-beta-lactamase) (Beta-lactamase II) (Carbapenem-hydrolyzing metallo-beta-lactamase) (Metallo-beta-lactamase type II)	Aeromonas hydrophila
ARO:3001067	SHV-8	AAB51384.1	O08337	bla	Beta-lactamase SHV-8 (EC 3.5.2.6)	Escherichia coli
ARO:3001065	SHV-6	CAA71948.1	P96348	bla	Beta-lactamase SHV-6 (EC 3.5.2.6) (Fragment)	Klebsiella pneumoniae
ARO:3001064	SHV-5	CAA39164.1	P0A3M1	bla	Beta-lactamase SHV-5 (EC 3.5.2.6)	Klebsiella pneumoniae
ARO:3001104	SHV-46	AAO53445.1	Q848S4	bla	Beta-lactamase SHV-46 (EC 3.5.2.6)	Klebsiella oxytoca
ARO:3001092	SHV-34	AAK64187.1	Q93LM8	bla	Beta-lactamase SHV-34 (EC 3.5.2.6)	Escherichia coli
ARO:3001087	SHV-29	AAG49894.1	Q9AHN9	bla	Beta-lactamase SHV-29 (EC 3.5.2.6)	Klebsiella pneumoniae
ARO:3001082	SHV-24	BAA84973.1	Q9S169	bla	Beta-lactamase SHV-24 (EC 3.5.2.6)	Escherichia coli
ARO:3001061	SHV-2A	CAA66730.1	P0A9Z8	bla	Beta-lactamase SHV-2 (EC 3.5.2.6) (SHV-2A)	Klebsiella pneumoniae
ARO:3001060	SHV-2	AAD37413.1	P0A9Z7	bla	Beta-lactamase SHV-2 (EC 3.5.2.6) (SHV-2A)	Escherichia coli
ARO:3001072	SHV-13	AAD43815.1	Q9S424	bla	Beta-lactamase SHV-13 (EC 3.5.2.6)	Klebsiella pneumoniae
ARO:3002995	ROB-1	CAA37052.1	P67919	rob1	Beta-lactamase ROB-1 (EC 3.5.2.6)	Mannheimia haemolytica (Pasteurella haemolytica)
ARO:3002481	AER-1	AAC09015.1	Q44056	aer1	Beta-lactamase AER-1 (EC 3.5.2.6) (Penicillinase)	Aeromonas hydrophila
ARO:3001702	OXA-133	ACE63186.1	B3U538	blaOXA-133	Beta-lactamase OXA-133 (EC 3.5.2.6) (BlaOXA-23-like protein)	Acinetobacter radioresistens
ARO:3003250	bcrC	AAA99503.1	P42334	bcrC	Bacitracin transport permease protein BcrC	Bacillus licheniformis
ARO:3002988	bcrB	AAA99505.1	P42333	bcrB	Bacitracin transport permease protein BCRB	Bacillus licheniformis
ARO:3002987	bcrA	AAA99504.1	P42332	bcrA	Bacitracin transport ATP-binding protein BcrA	Bacillus licheniformis
ARO:3000829	baeS	BAA15934.1	P30847	baeS	Signal transduction histidine-protein kinase BaeS (EC 2.7.13.3)	Escherichia coli (strain K12)
ARO:3001800	OXA-226	ACM67635.1	B9VXW8	blaOXA-226	Beta-lactamase (EC 3.5.2.6)	Pseudomonas aeruginosa
ARO:3002736	QnrB21	ACM50952.1	B9VWG9	qnrB21	QnrB21	Escherichia coli
ARO:3002249	CARB-10	ACJ61335.1	B9UN52	---	Beta-lactamase (EC 3.5.2.6)	Acinetobacter baumannii
ARO:3001158	SHV-109	ACM04459.1	B9U2I6	blaSHV-109	Beta-lactamase (EC 3.5.2.6)	Klebsiella pneumoniae
ARO:3001022	TEM-156	CAQ00120.1	B9DR46	blaTEM	Beta-lactamase (EC 3.5.2.6)	Proteus mirabilis
ARO:3003018	dfrA22	CAX16467.1	B8ZX83	dfrA22	Dihydrofolate reductase (EC 1.5.1.3)	uncultured bacterium
ARO:3002430	OKP-A-13	ACL68096.1	B8YHZ8	blaOKP-A	Beta-lactamase (EC 3.5.2.6)	Klebsiella pneumoniae
ARO:3002431	OKP-A-14	ACL68095.1	B8YHZ7	blaOKP-A	Beta-lactamase (EC 3.5.2.6)	Klebsiella pneumoniae
ARO:3002592	AAC(6')-Ib-Hangzhou	ACL37342.1	B8Y9I3	aac(6')-Ib-Hangzhou	Aminoglycoside acetyltransferase (Fragment)	Acinetobacter baumannii
ARO:3000926	TEM-57	ACJ43254.1	B8XLJ7	TEM-57	Beta-lactamase (EC 3.5.2.6)	Escherichia coli
ARO:3002953	vanXM	ACL82962.1	B8XGS4	vanXM	D-alanyl-D-alanine dipeptidase (D-Ala-D-Ala dipeptidase) (EC 3.4.13.22)	Enterococcus faecium (Streptococcus faecium)
ARO:3002911	vanM	ACL82961.1	B8XGS3	vanM	D-alanine--D-alanine ligase (EC 6.3.2.4) (D-Ala-D-Ala ligase) (D-alanylalanine synthetase)	Enterococcus faecium (Streptococcus faecium)
ARO:3002947	vanHM	ACL82960.1	B8XGS2	vanHM	VanHM	Enterococcus faecium (Streptococcus faecium)
ARO:3002961	vanYM	ACL82959.1	B8XGS1	vanYM	VanYM	Enterococcus faecium (Streptococcus faecium)
ARO:3002939	vanSM	ACL82958.1	B8XGS0	vanSM	VanSM	Enterococcus faecium (Streptococcus faecium)
ARO:3002928	vanRM	ACL82957.1	B8XGR9	vanRM	VanRM	Enterococcus faecium (Streptococcus faecium)
ARO:3002788	QnrD1	ACG70184.1	B8QSJ0	qnrD	QnrD	Salmonella enterica subsp. enterica serovar Bovismorbificans
ARO:3002546	AAC(6')-Ib	ACL36604.1	B8PWH7	aacA4	AacA4 (AacA4 aminoglycoside (6') acetyltransferase)	Proteus mirabilis
ARO:3003725	vanXI	WP_015943580.1	B8FPP3	---	D-alanyl-D-alanine dipeptidase (D-Ala-D-Ala dipeptidase) (EC 3.4.13.22)	Desulfitobacterium hafniense (strain DCB-2 / DSM 10664)
ARO:3002617	aadA17	ACK43806.1	B7U9E7	aadA17	Streptomycin 3''-adenylyltransferase (EC 2.7.7.47)	Aeromonas media
ARO:3002055	CMY-44	ACJ65711.1	B7U670	---	Beta-lactamase (EC 3.5.2.6)	Escherichia coli
ARO:3002793	QnrS4	ACJ24509.1	B7TZ43	qnrS	QnrS	Salmonella enterica subsp. enterica serovar Stanley
ARO:3003107	mefB	ACJ63262.1	B7TCK2	mef(B)	Macrolide efflux pump (MefB)	Escherichia coli
ARO:3001161	SHV-112	ACC99191.1	B7SNI7	---	Beta-lactamase (EC 3.5.2.6) (Fragment)	Klebsiella pneumoniae
ARO:3001157	SHV-108	ADR80606.1	B7FDE2	blaSHV-108	Beta-lactamase (EC 3.5.2.6)	Klebsiella pneumoniae
ARO:3001156	SHV-107	CAQ03507.1	B7FDE1	blaSHV-107	Beta-lactamase (EC 3.5.2.6)	Klebsiella pneumoniae
ARO:3001155	SHV-106	CAQ03506.1	B7FDE0	blaSHV-106	Beta-lactamase (EC 3.5.2.6)	Klebsiella pneumoniae
ARO:3001338	SHV-100	CAQ03505.1	B7FDD9	blaSHV-100	Beta-lactamase (EC 3.5.2.6)	Klebsiella pneumoniae
ARO:3001337	SHV-99	CAQ03504.1	B7FDD8	blaSHV-99	Beta-lactamase (EC 3.5.2.6)	Klebsiella pneumoniae
ARO:3001336	SHV-98	CAQ03503.1	B7FDD7	blaSHV-98	Beta-lactamase (EC 3.5.2.6)	Klebsiella pneumoniae
ARO:3001033	TEM-167	ACJ04051.1	B6VB30	blaTEM-167	Beta-lactamase (EC 3.5.2.6)	Escherichia coli
ARO:3002054	CMY-43	ACJ05361.1	B6VAZ4	AmpC	Beta-lactamase (EC 3.5.2.6)	Escherichia coli
ARO:3002184	MOX-4	ACI89425.1	B6V743	---	Beta-lactamase (EC 3.5.2.6)	Aeromonas caviae (Aeromonas punctata)
ARO:3001824	ACT-5	ACJ05689.1	B6V6L4	---	Beta-lactamase (EC 3.5.2.6)	Escherichia coli
ARO:3001830	ACT-7	ACJ05688.1	B6V6L3	---	Beta-lactamase (EC 3.5.2.6)	Klebsiella pneumoniae
ARO:3002173	MIR-8	ACJ05687.1	B6V6L2	---	Beta-lactamase (EC 3.5.2.6)	Klebsiella pneumoniae
ARO:3001825	ACT-6	ACJ05686.1	B6V6L1	---	Beta-lactamase (EC 3.5.2.6)	Klebsiella pneumoniae
ARO:3002318	KPC-8	ACI95258.1	B6V684	blaKPC-8	Beta-lactamase (EC 3.5.2.6)	Klebsiella pneumoniae
ARO:3002859	dfrA14	ACI32877.1	B6SCG1	dfrA14	DfrA14, trimethoprim-insensitive class A dihydrofolate reductase (Dihydrofolate reductase) (Dihydrofolate reductase A14) (Dihydrofolate reductase type 5) (EC 1.5.1.3)	Escherichia coli
ARO:3003954	efmA	BAG75524.1	B6F255	efmA	MFS transporter permease (Multidrug efflux pump)	Enterococcus faecium (Streptococcus faecium)
ARO:3001946	CTX-M-86	ACI29348.1	B6E9S0	---	Beta-lactamase (EC 3.5.2.6)	Salmonella enterica subsp. enterica serovar Agona
ARO:3002495	CTX-M-85	ACI29347.1	B6E9R9	---	Beta-lactamase (EC 3.5.2.6)	Salmonella enterica subsp. enterica serovar Albany
ARO:3001945	CTX-M-84	ACI29346.1	B6E9R8	---	Beta-lactamase (EC 3.5.2.6)	Salmonella derby
ARO:3001944	CTX-M-83	ACI29345.1	B6E9R7	---	Beta-lactamase (EC 3.5.2.6)	Salmonella derby
ARO:3001032	TEM-166	ACI25375.1	B6E296	---	Beta-lactamase (EC 3.5.2.6)	Escherichia coli
ARO:3001154	SHV-105	ACI22621.1	B6E133	blaSHV-105	Beta-lactamase (EC 3.5.2.6)	Klebsiella pneumoniae
ARO:3001779	OXA-146	ACI28281.1	B6E129	blaOXA-146	OXA-146 carbapenemase (OXA-23 beta-lactamase) (EC 3.5.2.6)	Acinetobacter baumannii
ARO:3001807	OXA-246	AHC31001.1	B6D9D4	oxa-10a	Beta-lactamase (EC 3.5.2.6)	Pseudomonas aeruginosa
ARO:3002575	AAC(6')-Iai	ACI28880.1	B6D9B6	aac(6')-Iai	AAC(6')-Iai	Pseudomonas aeruginosa
ARO:3002513	LRA-19	ACH59005.1	B5L5X0	blaLRA-19	LRA-19	uncultured bacterium BLR19
ARO:3002483	LRA-5	ACH59002.1	B5L5W7	blaLRA-5	Beta-lactamase (EC 3.5.2.6)	uncultured bacterium BLR5
ARO:3002489	LRA-10	ACH58999.1	B5L5W4	blaLRA-10	Beta-lactamase (EC 3.5.2.6)	uncultured bacterium BLR10
ARO:3002486	LRA-7	ACH58998.1	B5L5W3	blaLRA-7	LRA-7	uncultured bacterium BLR7
ARO:3002492	LRA-18	ACH58997.1	B5L5W2	blaLRA-18	LRA-18	uncultured bacterium BLR18
ARO:3002512	LRA-17	ACH58994.1	B5L5V9	blaLRA-17	LRA-17	uncultured bacterium BLR17
ARO:3002484	LRA-13	ACH58991.1	B5L5V6	blaLRA-13	Beta-lactamase (EC 3.5.2.6)	uncultured bacterium BLR13
ARO:3002511	LRA-12	ACH58990.1	B5L5V5	blaLRA-12	LRA-12	uncultured bacterium BLR12
ARO:3002488	LRA-9	ACH58989.1	B5L5V4	blaLRA-9	LRA-9	uncultured bacterium BLR9
ARO:3002487	LRA-8	ACH58988.1	B5L5V3	blaLRA-8	LRA-8	uncultured bacterium BLR8
ARO:3002510	LRA-3	ACH58987.1	B5L5V2	blaLRA-3	LRA-3	uncultured bacterium BLR3
ARO:3002485	LRA-2	ACH58985.1	B5L5V0	blaLRA-2	LRA-2	uncultured bacterium BLR2
ARO:3002482	LRA-1	ACH58980.1	B5L5U5	---	Beta-lactamase (EC 3.5.2.6)	uncultured bacterium BLR1
ARO:3002287	VIM-17	ABW90721.1	B5KVR9	blaVIM-17	Metallo-beta-lactamase VIM-17	Pseudomonas aeruginosa
ARO:3003379	Salmonella enterica ramR mutants	ACH50230.1	B5EYH1	---	Transcriptional regulator, TetR family	Salmonella agona (strain SL483)
ARO:3000853	AIM-1	CAQ53840.1	B5DCA0	blaAIM-1	Metallo-beta-lactamase AIM-1	Pseudomonas aeruginosa
ARO:3002453	OKP-B-20	CAP12360.2	B5D626	blaOKP-B	Beta-lactamase (EC 3.5.2.6)	Klebsiella pneumoniae
ARO:3002452	OKP-B-19	CAP12359.2	B5D625	blaOKP-B	Beta-lactamase (EC 3.5.2.6)	Klebsiella pneumoniae
ARO:3002451	OKP-B-18	CAP12358.1	B5D624	blaOKP-B	Beta-lactamase (EC 3.5.2.6)	Klebsiella pneumoniae
ARO:3002450	OKP-B-17	CAP12357.2	B5D623	blaOKP-B	Beta-lactamase (EC 3.5.2.6)	Klebsiella pneumoniae
ARO:3002429	OKP-A-12	CAP12354.2	B5D620	blaOKP-A	Beta-lactamase (EC 3.5.2.6)	Klebsiella pneumoniae
ARO:3002428	OKP-A-11	CAP12353.2	B5D619	blaOKP-A	Beta-lactamase (EC 3.5.2.6)	Klebsiella pneumoniae
ARO:3002471	LEN-24	CAP12352.2	B5D618	blaLEN	Beta-lactamase (EC 3.5.2.6)	Klebsiella pneumoniae
ARO:3002470	LEN-23	CAP12351.2	B5D617	blaLEN	Beta-lactamase (EC 3.5.2.6)	Klebsiella pneumoniae
ARO:3002469	LEN-22	CAP12350.2	B5D616	blaLEN	Beta-lactamase (EC 3.5.2.6)	Klebsiella pneumoniae
ARO:3002468	LEN-21	CAP12349.2	B5D615	blaLEN	Beta-lactamase (EC 3.5.2.6)	Klebsiella pneumoniae
ARO:3002467	LEN-20	CAP12348.2	B5D614	blaLEN	Beta-lactamase (EC 3.5.2.6)	Klebsiella pneumoniae
ARO:3002466	LEN-19	CAP12347.2	B5D613	blaLEN	Beta-lactamase (EC 3.5.2.6)	Klebsiella pneumoniae
ARO:3002465	LEN-18	CAP12346.2	B5D612	blaLEN	Beta-lactamase (EC 3.5.2.6)	Klebsiella pneumoniae
ARO:3001029	TEM-163	ACF32746.1	B5A5T0	---	Beta-lactamase (EC 3.5.2.6)	Escherichia coli
ARO:3002286	VIM-16	ACB54703.1	B4YAJ7	blaVIM-16	Metallo-beta-lactamase VIM-16	Pseudomonas aeruginosa
ARO:3002285	VIM-15	ACB54702.1	B4YAJ6	blaVIM-15	Metallo-beta-lactamase VIM-15	Pseudomonas aeruginosa
ARO:3001767	OXA-137	ABW76138.1	B4XT39	OXA-137	Class D beta-lactamase	Brachyspira pilosicoli
ARO:3001765	OXA-136	ABW76134.1	B4XT35	OXA-136	Class D beta-lactamase	Brachyspira pilosicoli
ARO:3002735	QnrB20	BAG55487.1	B3Y022	qnrB20	Pentapeptide repeat protein	Escherichia coli
ARO:3002366	PER-4	ACE77058.1	B3VI32	---	Beta-lactamase (EC 3.5.2.6)	Proteus vulgaris
ARO:3002616	aadA16	ACF17980.1	B3V3X6	aadA16	Aminoglycoside-(3'')(9)-adenylyltransferase	Escherichia coli
ARO:3002804	FosA2	ACC85616.1	B3U1G9	fosA2	FosA2	Enterobacter cloacae
ARO:3001939	CTX-M-78	CAQ42481.2	B3LE91	blaCTX-M-78	Beta-lactamase (EC 3.5.2.6)	Kluyvera georgiana
ARO:3001938	CTX-M-77	CAQ42480.1	B3LE90	bla	Beta-lactamase (EC 3.5.2.6)	Kluyvera ascorbata
ARO:3001937	CTX-M-76	CAQ42486.1	B3LE88	bla	Beta-lactamase (EC 3.5.2.6)	Kluyvera ascorbata
ARO:3002049	CMY-38	CAP60699.1	B3LDH1	blaCMY-38	Beta-lactamase (EC 3.5.2.6)	Proteus mirabilis
ARO:3002317	KPC-7	ACE62798.1	B3GS81	---	Beta-lactamase (EC 3.5.2.6)	Klebsiella pneumoniae
ARO:3001653	OXA-132	ACD84990.1	B3FYG9	---	Beta-lactamase OXA-132	Acinetobacter baumannii
ARO:3001652	OXA-131	ACD84989.1	B3FYG8	---	Beta-lactamase OXA-131	Acinetobacter baumannii
ARO:3001651	OXA-130	ACD84988.1	B3FYG7	---	Beta-lactamase OXA-130	Acinetobacter baumannii
ARO:3002799	QnrVC1	ACC54440.2	B3FVC6	qnrVC1	QnrVC1	Vibrio cholerae
ARO:3001609	OXA-114a	ABX38721.1	B3FIE3	---	Beta-lactamase (EC 3.5.2.6)	Alcaligenes xylosoxydans xylosoxydans (Achromobacter xylosoxidans)
ARO:3000846	SIM-1 beta-lactamase	ACT66697.1	B2ZTD9	blaSIM-1	Metallo-beta-lactamase SIM-1	Acinetobacter bereziniae (Acinetobacter genomosp. 10)
ARO:3001655	OXA-138	ACD45467.1	B2ZIF8	blaOXA-138	Beta-lactamase OXA-138	Acinetobacter nosocomialis
ARO:3000572	tet(42)	ACD35503.1	B2YGG2	tetA42	Tetracycline resistance protein	Micrococcus sp. SMCC G887
ARO:3003871	ADC-39	WP_063857800.1	B2MWW4	blaADC	Beta-lactamase (EC 3.5.2.6)	Acinetobacter baumannii
ARO:3001112	SHV-56	ACB73258.1	B2LUM6	blaSHV-56	Beta-lactamase (EC 3.5.2.6)	Klebsiella pneumoniae
ARO:3002850	arr-5	ABV26707.1	B2KPA6	arr-5	Arr-5	Klebsiella pneumoniae
ARO:3002849	arr-4	ABV26705.1	B2KPA4	arr-4	Arr-4	Pseudomonas aeruginosa
ARO:3002316	KPC-6	ACB71165.1	B2CYF2	blaKPC-6	Beta-lactamase (EC 3.5.2.6)	Klebsiella pneumoniae
ARO:3001947	CTX-M-87	ACB41777.1	B2CR57	---	Beta-lactamase (EC 3.5.2.6)	Escherichia coli
ARO:3002216	IMP-25	ACB41775.1	B2CPV4	blaIMP-25	Beta-lactamase (EC 3.5.2.6)	Pseudomonas aeruginosa
ARO:3003305	Ureaplasma urealyticum gyrB conferring resistance to fluoroquinolone	WP_004025678.1	B1RXC2	gyrB	DNA gyrase subunit B (EC 5.99.1.3)	Ureaplasma urealyticum serovar 13 str. ATCC 33698
ARO:3002052	CMY-41	BAG14343.1	B1Q4R9	blaCMY-41	Beta-lactamase (EC 3.5.2.6)	Citrobacter freundii
ARO:3002734	QnrB19	AGK90303.1	B1Q0X5	qnrB19	QnrB19 (Quinolone resistance protein) (Quinolone resistance protein B19)	Escherichia coli
ARO:3002051	CMY-40	ACA30422.1	B1PZ97	blaCMY-40	Beta-lactamase (EC 3.5.2.6)	Escherichia coli
ARO:3002038	CMY-27	ACA30421.1	B1PZ96	blaCMY-27	Beta-lactamase (EC 3.5.2.6)	Escherichia coli
ARO:3002036	CMY-25	ACA30420.1	B1PZ95	blaCMY-25	Beta-lactamase (EC 3.5.2.6)	Klebsiella pneumoniae
ARO:3002186	MOX-3	ACA30419.1	B1PZ94	blaMOX-3	Beta-lactamase (EC 3.5.2.6)	Aeromonas sp. HCUZ 2422275
ARO:3002044	CMY-33	ACA97847.1	B1PVT2	---	Beta-lactamase (EC 3.5.2.6)	Escherichia coli
ARO:3002043	CMY-32	ACA97846.1	B1PVT1	---	Beta-lactamase (EC 3.5.2.6)	Escherichia coli
ARO:3002374	VEB-6	ACA34904.1	B1P2H7	blaVEB-6	Beta-lactamase (EC 3.5.2.6)	Proteus mirabilis
ARO:3000172	FosB	YP_001715981.1	B1B3L7	fosD	Metallothiol transferase FosB (EC 2.5.1.-) (Fosfomycin resistance protein)	Staphylococcus aureus
ARO:3000194	tetW	ACA23185.1	B1AA36	tetW	TetW	Bifidobacterium longum
ARO:3001829	ACT-4	ABZ81086.1	B1A607	ampC	Beta-lactamase (EC 3.5.2.6)	Enterobacter asburiae
ARO:3001930	CTX-M-69	ABY91281.1	B0ZTA3	---	Beta-lactamase (EC 3.5.2.6)	Escherichia coli
ARO:3002315	KPC-5	ABY91240.1	B0ZSP4	blaKPC-5	Beta-lactamase (EC 3.5.2.6)	Pseudomonas aeruginosa
ARO:3001438	OXA-100	CAJ77817.2	B0R1P6	blaOXA-100	Beta-lactamase OXA-100 (Beta-lactamase OXA-89) (BlaOXA-100 class D beta-lactamase)	Acinetobacter baumannii
ARO:3001650	OXA-90	CAJ77809.1	B0R1P5	blaOXA-90	Beta-lactamase OXA-90 (Class D beta lactamase) (EC 3.5.2.6)	Acinetobacter baumannii
ARO:3001399	OXA-4	AET05998.1	B0LVG3	blaOXA-4	Beta-lactamase (EC 3.5.2.6)	Pseudomonas aeruginosa
ARO:3001648	OXA-128	ABY77907.1	B0LUU7	---	Beta-lactamase OXA-128	Acinetobacter baumannii
ARO:3001803	OXA-142	ABY79006.1	B0LQJ4	blaOXA-142	Beta-lactamase (EC 3.5.2.6)	Pseudomonas aeruginosa
ARO:3001017	TEM-150	CAJ66089.1	B0JD04	blaTEM-150	Beta-lactamase (EC 3.5.2.6)	Escherichia coli
ARO:3002236	IMP-45	AIA58910.1	B0FWK3	bla IMP-25	Beta-lactamase (EC 3.5.2.6)	Pseudomonas aeruginosa
ARO:3001118	SHV-63	ABY56290.1	B0FP98	blaSHV-63	Beta-lactamase (EC 3.5.2.6)	Klebsiella pneumoniae
ARO:3002862	dfrA7	ACS44716.1	B0FND5	dfrVII	Dihydrofolate reductase (Dihydrofolate reductase type A7)	Acinetobacter baumannii
ARO:3002667	rmtD	ABY64751.1	B0F9V0	rmtD	RmtD (RmtD1)	Klebsiella pneumoniae
ARO:3001811	OXA-129	CAP69660.1	B0BKZ9	blaOXA-129	Beta-lactamase (EC 3.5.2.6)	Salmonella enterica subsp. enterica serovar Bredeney
ARO:3003017	dfrA21	CAP69659.1	B0BKZ8	dfrA21	Dihydrofolate reductase (EC 1.5.1.3)	Salmonella enterica subsp. enterica serovar Bredeney
ARO:3003578	PmrF	AAC75314.1	P77757	arnC	Undecaprenyl-phosphate 4-deoxy-4-formamido-L-arabinose transferase (EC 2.4.2.53) (Polymyxin resistance protein PmrF) (Undecaprenyl-phosphate Ara4FN transferase) (Ara4FN transferase)	Escherichia coli (strain K12)
ARO:3002985	arnA	NP_252244	Q9HY63	arnA	Bifunctional polymyxin resistance protein ArnA [Includes: UDP-4-amino-4-deoxy-L-arabinose formyltransferase (EC 2.1.2.13) (ArnAFT) (UDP-L-Ara4N formyltransferase); UDP-glucuronic acid oxidase, UDP-4-keto-hexauronic acid decarboxylating (EC 1.1.1.305) (ArnADH) (UDP-GlcUA decarboxylase) (UDP-glucuronic acid dehydrogenase)]	Pseudomonas aeruginosa (strain ATCC 15692 / DSM 22644 / CIP 104116 / JCM 14847 / LMG 12228 / 1C / PRS 101 / PAO1)
ARO:3002985	arnA	AAC75315.1	P77398	arnA	Bifunctional polymyxin resistance protein ArnA (Polymyxin resistance protein PmrI) [Includes: UDP-4-amino-4-deoxy-L-arabinose formyltransferase (EC 2.1.2.13) (ArnAFT) (UDP-L-Ara4N formyltransferase); UDP-glucuronic acid oxidase, UDP-4-keto-hexauronic acid decarboxylating (EC 1.1.1.305) (ArnADH) (UDP-GlcUA decarboxylase) (UDP-glucuronic acid dehydrogenase)]	Escherichia coli (strain K12)
ARO:3000839	arlS	YP_499945.1	Q9KJN3	arlS	Signal transduction histidine-protein kinase ArlS (EC 2.7.13.3)	Staphylococcus aureus (strain NCTC 8325)
ARO:3002638	APH(3'')-Ia	CAA37605.1	P18150	aphE	Streptomycin 3''-kinase (EC 2.7.1.87) (Streptomycin 3''-phosphotransferase) (Streptomycin 6-kinase) (Streptomycin 6-phosphotransferase)	Streptomyces griseus
ARO:3003803	Staphylococcus aureus agrA with mutation conferring daptomycin resistance	CAG41107	Q6GF33	agrA	Accessory gene regulator protein A	Staphylococcus aureus (strain MRSA252)
ARO:3003807	Escherichia coli acrR with mutation conferring multidrug antibiotic resistance	NP_414997.1	P0ACS9	acrR	HTH-type transcriptional regulator AcrR (Potential acrAB operon repressor)	Escherichia coli (strain K12)
ARO:3000502	AcrF	AAC76298.1	P24181	acrF	Multidrug export protein AcrF (Acriflavine resistance protein F) (Protein EnvD)	Escherichia coli (strain K12)
ARO:3000499	AcrE	AAC76297.1	P24180	acrE	Multidrug export protein AcrE (Acriflavine resistance protein E) (Protein EnvC)	Escherichia coli (strain K12)
ARO:3000216	acrB	NP_414995.1	P31224	acrB	Multidrug efflux pump subunit AcrB (AcrAB-TolC multidrug efflux pump subunit AcrB) (Acridine resistance protein B)	Escherichia coli (strain K12)
ARO:3004043	Escherichia coli acrA	NP_414996.1	P0AE06	acrA	Multidrug efflux pump subunit AcrA (AcrAB-TolC multidrug efflux pump subunit AcrA) (Acridine resistance protein A)	Escherichia coli (strain K12)
ARO:3002627	aadK	CAB14620.1	P17585	aadK	Aminoglycoside 6-adenylyltransferase (EC 2.7.7.-) (AAD(6))	Bacillus subtilis (strain 168)
ARO:3002543	AAC(3)-IXa	AAA25334.1	P29810	aacC9	Aminoglycoside N(3)-acetyltransferase IX (EC 2.3.1.81) (ACC(3)-IX) (Aminocyclitol 3-N-acetyltransferase type IX)	Micromonospora chalcea
ARO:3002542	AAC(3)-VIIIa	AAA26685.1	P29809	aacC8	Aminoglycoside N(3)-acetyltransferase VIII (EC 2.3.1.81) (ACC(3)-VIII) (Aminocyclitol 3-N-acetyltransferase type VIII)	Streptomyces fradiae (Streptomyces roseoflavus)
ARO:3002541	AAC(3)-VIIa	AAA88552.1	P30180	aacC7	Aminoglycoside N(3)-acetyltransferase VII (EC 2.3.1.81) (ACC(3)-VII) (Aminocyclitol 3-N-acetyltransferase type VII)	Streptomyces rimosus subsp. paromomycinus
ARO:3002536	AAC(3)-IIIa	CAA39184.1	P29808	aacC3	Aminoglycoside N(3)-acetyltransferase III (EC 2.3.1.81) (ACC(3)-III) (Aminocyclitol 3-N-acetyltransferase type III) (Gentamicin-(3)-N-acetyl-transferase)	Pseudomonas aeruginosa
ARO:3002597	AAC(6')-Ie-APH(2'')-Ia	NP_863643.1	P0A0C1	aacA-aphD	Bifunctional AAC/APH [Includes: 6'-aminoglycoside N-acetyltransferase (EC 2.3.1.-) (AAC(6')); Aminoglycoside 2''-phosphotransferase (2''-aminoglycoside phosphotransferase) (EC 2.7.1.190) (APH(2''))]	Staphylococcus aureus
ARO:3002549	AAC(6')-Ic	AAA26549.1	Q54441	---	Aminoglycoside N(6')-acetyltransferase type 1 (EC 2.3.1.82) (AAC(6')-Ic) (Aminoglycoside resistance protein)	Serratia marcescens
ARO:3002570	AAC(6')-Iz	AAD52985.1	Q9RBW7	---	Aminoglycoside N(6')-acetyltransferase type 1 (EC 2.3.1.82) (AAC(6')-Iz) (Aminoglycoside resistance protein)	Stenotrophomonas maltophilia (Pseudomonas maltophilia) (Xanthomonas maltophilia)
ARO:3002546	AAC(6')-Ib	AAA26550.1	P20092	aacA4	Aminoglycoside N(6')-acetyltransferase type 1 (EC 2.3.1.82) (AAC(6')-I) (Aminoglycoside resistance protein)	Serratia marcescens
ARO:3002571	AAC(6')-Iaa	NP_460578.1	Q8ZPB6	---	Aminoglycoside N(6')-acetyltransferase type 1 (EC 2.3.1.82) (AAC(6')-I) (Aminoglycoside resistance protein)	Salmonella typhimurium (strain LT2 / SGSC1412 / ATCC 700720)
ARO:3002569	AAC(6')-Iy	AAF03531.1	Q9R381	---	Aminoglycoside N(6')-acetyltransferase type 1 (EC 2.3.1.82) (AAC(6')-Iy) (Aminoglycoside resistance protein)	Salmonella enteritidis
ARO:3002545	AAC(6')-Ia	AAA98298.1	P10051	aacA1	Aminoglycoside N(6')-acetyltransferase type 1 (EC 2.3.1.82) (AAC(6')-I) (Aminoglycoside resistance protein)	Citrobacter koseri (Citrobacter diversus)
ARO:3002554	AAC(6')-Ig	AAA21889.1	Q44057	---	Aminoglycoside N(6')-acetyltransferase type 1 (EC 2.3.1.82) (AAC(6')-Ig) (Aminoglycoside resistance protein)	Acinetobacter haemolyticus
ARO:3002557	AAC(6')-Ij	AAC41392.1	Q44245	---	Aminoglycoside N(6')-acetyltransferase type 1 (EC 2.3.1.82) (AAC(6')-Ij) (Aminoglycoside resistance protein)	Acinetobacter genomosp. 13
ARO:3002555	AAC(6')-Ih	AAC41391.1	Q43899	---	Aminoglycoside N(6')-acetyltransferase type 1 (EC 2.3.1.82) (AAC(6')-Ih) (Aminoglycoside resistance protein)	Acinetobacter baumannii
ARO:3002534	AAC(3)-IIb	AAA26548.1	Q01515	aac3-Vb	Aminoglycoside N(3)-acetyltransferase III (EC 2.3.1.81) (ACC(3)-III) (Aminocyclitol 3-N-acetyltransferase type III) (Gentamicin-(3)-N-acetyl-transferase)	Serratia marcescens
ARO:3002523	AAC(2')-Ia	AAA03550.1	Q52424	aac	Aminoglycoside 2'-N-acetyltransferase (EC 2.3.1.59) (AAC(2')-Ia)	Providencia stuartii
ARO:3002525	AAC(2')-Ic	CCP42991.1	P9WQG9	aac	Aminoglycoside 2'-N-acetyltransferase (EC 2.3.1.-) (AAC(2')-Ic)	Mycobacterium tuberculosis (strain ATCC 25618 / H37Rv)
ARO:3002526	AAC(2')-Id	AAB41701.1	P94968	aac	Aminoglycoside 2'-N-acetyltransferase (EC 2.3.1.-) (AAC(2')-Id)	Mycobacterium smegmatis (strain ATCC 700084 / mc(2)155)
ARO:3002524	AAC(2')-Ib	AAC44793.1	Q49157	aac	Aminoglycoside 2'-N-acetyltransferase (EC 2.3.1.-) (AAC(2')-Ib)	Mycobacterium fortuitum
ARO:3001159	SHV-110	AEK48094.1	A9ZTC6	blaSHV	Beta-lactamase (EC 3.5.2.6)	Klebsiella pneumoniae
ARO:3001923	CTX-M-62	ABP04245.1	A9XG17	blaCTX-M-62	Beta-lactamase (EC 3.5.2.6)	Klebsiella pneumoniae
ARO:3002730	QnrB15	ABX72227.1	A9QXW6	qnrB15	QnrB15	Citrobacter freundii
ARO:3001153	SHV-104	ABX71158.1	A9QW44	---	Beta-lactamase (EC 3.5.2.6)	Klebsiella pneumoniae
ARO:3001030	TEM-164	ABX71157.1	A9QW43	---	Beta-lactamase (EC 3.5.2.6)	Klebsiella pneumoniae
ARO:3002728	QnrB14	ABX72044.1	A9QW08	qnrB14	QnrB14	Citrobacter freundii
ARO:3002727	QnrB13	ABX72042.1	A9QW06	qnrB12	QnrB12	Citrobacter freundii
ARO:3001443	OXA-121	AGU69248.1	A9LS13	bla-oxa-121	Beta-lactamase OXA-121 (Beta-lactamase OXA-51-like protein)	Acinetobacter baumannii
ARO:3001672	OXA-120	CCJ32595.1	A9LS12	blaOXA-120	Beta-lactamase (Beta-lactamase OXA-120) (Beta-lactamase OXA-51-like protein)	Acinetobacter baumannii
ARO:3001646	OXA-98	CAK50801.1	A9LS11	oxa98	Beta-lactamase OXA-51-like protein (Beta-lactamase oxa98) (Class D beta-lactamase) (OXA-98 beta-lactamase) (EC 3.5.2.6)	Acinetobacter baumannii
ARO:3002938	vanSL	ABX54692.1	A9LN40	vanSL	Sensor histidine kinase	Enterococcus faecalis (Streptococcus faecalis)
ARO:3002927	vanRL	ABX54691.1	A9LN39	vanRL	Response regulator	Enterococcus faecalis (Streptococcus faecalis)
ARO:3002974	vanTrL	ABX54690.1	A9LN38	vanTrL	Alanine racemase (EC 5.1.1.1)	Enterococcus faecalis (Streptococcus faecalis)
ARO:3002973	vanTmL	ABX54689.1	A9LN37	vanTmL	Serine racemase	Enterococcus faecalis (Streptococcus faecalis)
ARO:3002968	vanXYL	ABX54688.1	A9LN36	vanXYL	D,D-carboxypeptidase/D,D-dipeptidase	Enterococcus faecalis (Streptococcus faecalis)
ARO:3002910	vanL	ABX54687.1	A9LN35	vanL	D-alanine--D-alanine ligase (EC 6.3.2.4) (D-Ala-D-Ala ligase) (D-alanylalanine synthetase)	Enterococcus faecalis (Streptococcus faecalis)
ARO:3002733	QnrB18	CAP45903.1	A9J7N3	qnrB18	Quinolone resistance protein B18	Citrobacter freundii
ARO:3002732	QnrB17	CAP45902.1	A9J7N2	qnrB17	Quinolone resistance protein B17	Citrobacter freundii
ARO:3000886	TEM-15	CAO98721.1	A9J5X3	blaTEM-15	Beta-lactamase (EC 3.5.2.6)	Haemophilus parainfluenzae
ARO:3001160	SHV-111	BAF95849.1	A9CSQ3	blaSHV	Beta-lactamase (EC 3.5.2.6)	Klebsiella pneumoniae
ARO:3002050	CMY-39	BAF95726.1	A9CSF7	blaCMY-39	Beta-lactamase (EC 3.5.2.6)	Citrobacter freundii
ARO:3001442	OXA-117	ABW95048.1	A8WCG7	bla-oxa-117	Carbapenem-hydrolyzing beta-lactamase OXA-117 (Fragment)	Acinetobacter baumannii
ARO:3001441	OXA-116	ABW95047.1	A8WCG6	bla-oxa-116	Carbapenem-hydrolyzing beta-lactamase OXA-116 (Fragment)	Acinetobacter baumannii
ARO:3001941	CTX-M-80	ABW86620.2	A8W9A7	---	Beta-lactamase (EC 3.5.2.6)	Klebsiella pneumoniae
ARO:3001644	OXA-113	ABW70410.1	A8STK0	oxa-113	Beta-lactamase OXA-113 (Beta-lactamase oxa113)	Acinetobacter baumannii
ARO:3000217	blaR1	ABU39979.1	A8RR43	blaR1	Penicillin-binding protein	Bacillus clausii
ARO:3000160	blaI	ABU39978.1	A8RR40	blaI	Penicillinase repressor	Bacillus clausii
ARO:3000847	KHM-1 beta-lactamase	BAF91108.1	A8R403	blaKHM-1	Beta-lactamase (EC 3.5.2.6)	Citrobacter freundii
[truncated: 385 more rows]

## Sheet: README-AR genes
SUPPLEMENTARY TABLE 2 - Compilation of antibiotic-resistance genes from CARD database
ReadMe: AR genes
Column header	Description
ARO accession	Antibiotic Resistance Ontology (ARO) accession identifiers from the CARD database
ARO name	ARO name of the antibiotic-resistant gene
Protein accession	NCBI protein accession ID of the antibiotic-resistant gene
UniProt entry	UniProt accession ID of the antibiotic-resistant gene
Primary gene name	Primary gene name of the antibiotic-resistant gene
Protein names	Description of the antibiotic-resistant gene
Organism	Organism name
